# Supplementary material
Source: PubMed Central journal article supplement (PMC2823299)

## Supporting Information

### Interplay of Structure, Hydration and Thermal Stability in Formacetal Modified Oligonucleotides: RNA May Tolerate Nonionic Modifications Better than DNA

Andrej Kolarovic,<sup>†</sup> Emma Schweizer,<sup>‡</sup> Emmily Greene,<sup>‡</sup> Marc Gironda,<sup>‡</sup> Pradeep S. Pallan,<sup>§</sup>  
Martin Egli<sup>§</sup> and Eriks Rozners<sup>\*,†,‡</sup>

<sup>‡</sup> Department of Chemistry, Binghamton University, State University of New York, Binghamton, New York 13902, <sup>†</sup> Department of Chemistry and Chemical Biology, Northeastern University, Boston, Massachusetts 02115 and <sup>§</sup> Department of Biochemistry, School of Medicine, Vanderbilt University, Nashville, Tennessee 37232.

#### Table of contents

|                                                          |         |
|----------------------------------------------------------|---------|
| Experimental Procedures                                  | Pg. S2  |
| UV melting data                                          | Pg. S10 |
| Modeled duplex [d(TfApTfApTfApTfApTfApTfA)] <sub>2</sub> | Pg. S12 |
| Copies of <sup>1</sup> H and <sup>13</sup> C NMR spectra | Pg. S14 |

## Experimental Procedures

Methylene chloride, pyridine, acetonitrile, and toluene were dried by refluxing with CaH<sub>2</sub> followed by distillation. Tetrahydrofuran was distilled from sodium/ benzophenone ketyl. Reactions were carried out in oven (150 °C) dried glassware under an atmosphere of dry nitrogen. NMR spectra were recorded either on a Varian Mercury 300 MHz or on a Bruker AM360 spectrometer at ambient temperature. Thin layer chromatography (TLC) was performed on Silacycle 0.25 mm 60 Å silica gel F<sub>254</sub> plates. Column chromatography was done on SiliaFlash® P60 230-400 mesh silica gel (Silacycle).

**Dimer 3** was prepared following the procedure by He and Bischofberger.<sup>1</sup> Uridine donor **1**<sup>2</sup> (399 mg, 586 μmol, 2.0 eq.) and adenosine acceptor **2**<sup>3</sup> (176 mg, 293 μmol, 1.0 eq.) were coevaporated with dry THF (3 × 2.5 mL). *N*-iodosuccinimide (198 mg, 1.88 mmol, 3.0 eq.) was dried under oil pump vacuum (<0.1 mmHg) for 40 minutes, dissolved in dry THF (5 mL) and added to **1** and **2** under nitrogen atmosphere. The solution was cooled to -40 °C and triflic acid (2.0 eq., 586 μmol, 88 mg, 52 μl) was added dropwise. The mixture was stirred for 1.5 h allowing the temperature to gradually rise to -25 °C. Diisopropylethylamine (0.1 ml) was added and the reaction was quenched by addition of saturated aqueous NaHCO<sub>3</sub> (50 mL), saturated aqueous Na<sub>2</sub>S<sub>2</sub>O<sub>3</sub> (50 mL) and CH<sub>2</sub>Cl<sub>2</sub> (100 mL). After extraction the aqueous phase was washed again with CH<sub>2</sub>Cl<sub>2</sub> (30 mL). The organic phases were combined, dried over Na<sub>2</sub>SO<sub>4</sub> and concentrated. The light-brown foam purified by silica gel column chromatography (toluene/ethyl acetate, stepwise 1:1) to give 260 mg of dimer **3**, 72% yield. MS (FAB+) *m/z* (M+H) 1332.4 (calc. 1332.5). <sup>1</sup>H-NMR (CDCl<sub>3</sub>, 300 MHz) δ: 9.54 (s, 1H), 9.43 (s, 1H), 8.78 (s, 1H), 8.23 (s, 1H), 8.04 (d, 2H, *J* = 7.5 Hz), 7.90 (d, 1H, *J* = 7.2 Hz), 7.69-7.29 (m, 17 H), 6.26 (d, 1H, *J* = 5.1 Hz), 5.96 (d, 1H, *J* = 3.9 Hz), 5.46 (t, 1H, *J* = 5.1 Hz), 5.35 (dd, 1H, *J*<sub>A</sub> = 2.1 Hz, *J*<sub>B</sub> = 8.4 Hz), 4.82-4.70 (m, 3H), 4.58 (t, 1H, *J* = 5.1 Hz), 4.26 (t, 1H, *J* = 4.5 Hz), 4.21 (m, 1H), 4.13 (dd, 1H, *J*<sub>A</sub> = 4.2 Hz, *J*<sub>B</sub> = 8.7 Hz), 3.92-3.72 (m, 4H), 1.10 (s, 9H), 0.89 (s, 9H), 0.83 (s, 9H), 0.05 (s, 3H), 0.02 (s, 3H), -0.02 (s, 3H), -0.14 (s, 3H). <sup>13</sup>C-NMR (CDCl<sub>3</sub>) δ: 164.9, 164.2, 162.9, 152.4, 151.6, 150.2, 149.7, 142.2, 139.6, 135.6, 135.3, 134.2, 133.5, 133.2, 132.7, 132.0, 131.3, 130.2, 130.1, 128.7, 128.1, 128.0, 126.8, 123.9, 102.9, 96.4, 89.4, 86.7, 83.6, 83.1, 75.6, 74.9, 71.6, 67.6, 63.1, 27.0, 25.8, 25.7, 19.3, 18.0, 17.9, -4.4, -4.7, -4.8.

<sup>1</sup> He, G. X.; Bischofberger, N. *Tetrahedron Lett.* **1997**, *38*, 945-948.

<sup>2</sup> Rozners, E.; Strömberg, R. *J.Org.Chem.* **1997**, *62*, 1846-1850.

<sup>3</sup> Zhu, X. F.; Williams, H. J.; Scott, A. I. *Perkin I* **2000**, 2305-2306.

**Dimer 4.** Dimer **3** (1.05 g, 0.852 mmol) was dissolved in 1M tetrabutylammonium fluoride (TBAF, 10 mL). The reaction was monitored by TLC (MeOH/CH<sub>2</sub>Cl<sub>2</sub>, 1:9). After 18 h the reaction was quenched with CH<sub>2</sub>Cl<sub>2</sub> (180 mL) and water (100 mL). The aqueous phase was extracted with CH<sub>2</sub>Cl<sub>2</sub> (50 mL). Sticky solids formed during work-up (remaining on the surface of separation funnel) were dissolved in 30% MeOH in CH<sub>2</sub>Cl<sub>2</sub> and added to the organic solutions. Concentration resulted in a dark-brown residue, which was purified by preparative TLC (10% MeOH/CH<sub>2</sub>Cl<sub>2</sub>) to give 514 mg of dimer **4** as pale-brown solid, which was contaminated with TBAF in molar ratio ca. 1:1 (estimated yield ca. 0.50 mmol, 59%). Further purification was inefficient and resulted in loss of material. However, the crude product could be used directly in the next step. MS (FAB+) *m/z* (M+H) 765.5 (calc. 766.2). <sup>1</sup>H-NMR (d<sub>6</sub>-DMSO, 300 MHz) δ: 8.73 (s, 1H), 8.62 (s, 1H), 8.03 (d, 2H, *J* = 7.2 Hz), 7.93 (d, 1H, *J* = 8.1 Hz), 7.83 (d, 1H, *J* = 7.5 Hz), 7.66-7.42 (m, 6H), 6.06 (d, 1H, *J* = 5.1 Hz), 6.03 (d, 1H, *J* = 5.7 Hz), 5.68 (d, 1H, *J* = 8.1 Hz), 5.51 (t, 1H, *J* = 5.3 Hz), 4.77-4.66 (m, 3H), 4.48 (t, 1H, *J* = 4.8 Hz), 4.16 (t, 1H, *J* = 4.2 Hz), 4.07 (m, 2H), 3.77 (dd, 1H, *J*<sub>A</sub> = 5.4 Hz, *J*<sub>B</sub> = 11.1 Hz), 3.69 (dd, 1H, *J*<sub>A</sub> = 3.9 Hz, *J*<sub>B</sub> = 11.1 Hz), 3.57 (m, 2H).

**Dimer 5.** Crude dimer **4** (490 mg, 0.48 mmol) was coevaporated with dry pyridine (10 mL). *para*-Methoxytrityl chloride (294 mg, 0.95 mmol, 2 eq.) was added in three equal portions each in dry pyridine (20 mL). After each addition the mixture was evaporated and coevaporated twice with dry pyridine (20 mL). Each evaporation took ca. 10 minutes at 35 °C (water bath). The residue was dissolved in CH<sub>2</sub>Cl<sub>2</sub> (150 mL) and extracted with saturated aqueous NaHCO<sub>3</sub> (50 mL), aqueous phase extracted with CH<sub>2</sub>Cl<sub>2</sub> (50 mL), organic phases were dried over Na<sub>2</sub>SO<sub>4</sub> and concentrated. Silica gel column chromatography (CH<sub>2</sub>Cl<sub>2</sub>/MeOH/Et<sub>3</sub>N, 94:5:1) yielded 328 mg (0.316 mmol, ca. 66%) of dimer **5**, the overall yield starting from dimer **3** is 39%. MS (FAB+) *m/z* (M+H) 1036.7 (calc. 1038.3). <sup>1</sup>H-NMR (CDCl<sub>3</sub>, 300 MHz) δ: 10.32 (bs, 1H), 9.58 (bs, 1H), 8.62 (s, 1H), 8.22 (s, 1H), 7.99 (d, 2H, *J* = 7.2 Hz), 7.80 (t, 2H, *J* = 8.7 Hz), 7.52-7.17 (m, 18H), 6.82 (d, 2H, *J* = 9.0 Hz), 6.04 (m, 2H), 5.67 (t, 1H, *J* = 3.0 Hz), 5.35 (dd, 1H, *J*<sub>A</sub> = 1.2 Hz, *J*<sub>B</sub> = 8.1 Hz), 4.72-4.55 (m, 4H), 4.27 (m, 2H), 4.13 (d, 1H, *J* = 3.0 Hz), 3.73 (s, 3H), 3.64-3.39 (m, 4H).

**H-phosphonate dimer 6.** Dimer **5** (265 mg, 255 μmol) was coevaporated with dry pyridine (3 × 5 mL), the residue was dissolved in a mixture of THF (5 mL) and pyridine (2 mL) and cooled to -78 °C. 2-Chlorobenzoyl chloride (37.8 μL of 95% purity, 282 μmol, 1.125 eq.) in THF (0.9 mL) was added dropwise. The reaction mixture was stirred for 90 minutes (TLC MeOH/CH<sub>2</sub>Cl<sub>2</sub> 1:9) and transferred

via syringe into a pre-cooled (-78 °C) mixture of imidazole (208 mg, 3.06 mmol, 12.0 eq.), PCl<sub>3</sub> (89 μL, 1.02 mmol, 4.0 eq.) and Et<sub>3</sub>N (427 μL, 3.06 mmol, 12.0 eq.) in CH<sub>2</sub>Cl<sub>2</sub> (5 mL). After 30 minutes the reaction mixture was poured into 2 M triethylammonium bicarbonate (pH <8, 60 mL) and extracted with CH<sub>2</sub>Cl<sub>2</sub> (100 mL). The aqueous phase was extracted with CH<sub>2</sub>Cl<sub>2</sub> (50 mL), organic solutions were dried and concentrated to give a pale-brown solid. The residue was purified by silica gel column chromatography using a stepwise gradient (10% to 16%) of MeOH in CH<sub>2</sub>Cl<sub>2</sub> containing 0.2% of Et<sub>3</sub>N. To remove remaining triethylammonium salts the final product was dissolved in CH<sub>2</sub>Cl<sub>2</sub> (50 mL) and washed twice with water (10 mL). Evaporation of the organic phase gave 250 mg of H-phosphonate dimer **6**, 73%. MS (FAB+) *m/z* (M+H) 1240.6 (calc. 1240.2). <sup>1</sup>H-NMR (CDCl<sub>3</sub>, 300 MHz) δ: 9.59 (bs, 1H), 9.32 (bs, 1H), 8.78 (s, 1H), 8.28 (s, 1H), 8.02-7.85 (m, 4H), 7.72 (d, 1H, *J* = 8.1 Hz), 7.57-7.16 (m, 21H), 6.83 (d, 2H, *J* = 9.0 Hz), 6.42 (d, 1H, *J* = 4.8 Hz), 6.19 (d, 1H, *J* = 4.5 Hz), 5.93 (t, 1H, *J* = 5.1 Hz), 5.85 (s, 0.5H), 5.67 (t, 1H, *J* = 4.8 Hz), 5.34 (d, 1H, *J* = 8.4 Hz), 5.26 (p, 1H, *J* = 5.1 Hz), 4.79-4.70 (m, 3H), 4.46 (dd, 1H, *J*<sub>A</sub> = 4.2 Hz, *J*<sub>B</sub> = 6.9 Hz), 4.27 (m, 1H), 3.93 (dd, 1H, *J*<sub>A</sub> = 2.7 Hz, *J*<sub>B</sub> = 11.4 Hz), 3.80 (dd, 1H, *J*<sub>A</sub> = 4.2 Hz, *J*<sub>B</sub> = 11.4 Hz), 3.74 (s, 3H), 3.49 (m, 2H), 2.94 (m, 6H), 1.20 (t, 9H, *J* = 7.5 Hz).

**Preparation of solid support for synthesis of formacetal modified RNA.** Dimer **5** was converted into mixture of 2' and 3'-O-succinates following our previously reported procedures.<sup>4</sup> Long Chain Alkyl Amino Controlled Pore Glass (LCAA CPG, 100 mg, 6-8 μmol of free amino groups) was placed in a 2.5 mL syringe fitted with glass frit filter and washed twice with dry DMF (1 mL). The succinate mixture (15 mg, 11.8 μmol) was evaporated with dry pyridine (3 × 1 mL) and dissolved in dry DMF (0.8 mL), diisopropylethylamine (100 μL, 575 μmol) and HBTU (4.2 mg 11.2 μmol) were added and the mixture was stirred for 40 min. The mixture was taken in the syringe with LCAA CPG and the syringe was agitated at room temperature for 22 h. The reaction mixture was discarded and the solid support was washed with CH<sub>2</sub>Cl<sub>2</sub> (3 × 1 mL) and DMF (3 × 1 mL). Remaining free amino groups were capped with acetic anhydride (0.1 mL) and 2,6-lutidine (0.1 mL) in DMF (0.5 mL) for 30 min. The capping mixture was discarded, the solid support was washed with DMF (3 × 1 mL), methanol (2 × 1 mL), CH<sub>2</sub>Cl<sub>2</sub> (3 × 1 mL) and diethyl ether (2 × 1 mL) and finally dried in vacuum. Treatment of small aliquot with 5% dichloroacetic acid in CH<sub>2</sub>Cl<sub>2</sub> followed by spectrometric evaluation of the yellow trityl color indicated that the support was loaded with formacetal-linked succinate at 28 μmol/g.

<sup>4</sup> Sigurdsson, S.; Rozners, E.; Westner, E.; Bizdena, E.; Strömberg, R. *Nucleosides Nucleotides* **1995**, *14*, 875-878.

**Synthesis of formacetal modified RNA (UfA)<sub>6</sub>** was done following our previously reported procedures.<sup>5,6</sup> Long chain alkylamino controlled pore glass support derivatized with dimer **5** (~40 mg, 28 μmol/g, ~1.12 mmol) was placed in a gastight glass syringe (1 mL) equipped with a porous glass filter. All reactions and washings were done by manual intake of an appropriate solvent or reagent as shown in Table S1.

**Table S1.** Solid phase synthesis protocol

| Step         | Reagent or solvent                                        | Volume     | Time  |
|--------------|-----------------------------------------------------------|------------|-------|
| Coupling     | 0.1 M H-phosphonate in pyridine, mix with                 | 0.1 mL     | 3 min |
|              | 0.5 M pivaloyl chloride in MeCN                           | 0.1 mL     |       |
| Washing      | MeCN                                                      | 4 × 0.5 mL | 4 min |
|              | CH <sub>2</sub> Cl <sub>2</sub>                           | 4 × 0.5 mL |       |
| Deprotection | 3% dichloroacetic acid in CH <sub>2</sub> Cl <sub>2</sub> | 5 × 0.5 mL | 2 min |
| Washing      | CH <sub>2</sub> Cl <sub>2</sub>                           | 4 × 0.5 mL | 4 min |
|              | MeCN                                                      | 4 × 0.5 mL |       |

After the assembly of the desired sequence was complete, the support was treated with 2% I<sub>2</sub> in pyridine/water (98:2, 30 min, rt), washed with acetonitrile (5 × 1 mL) and CH<sub>2</sub>Cl<sub>2</sub> (4 × 1 mL) and dried. Oligoribonucleotides were cleaved from the support and deprotected using concentrated aqueous ammonia/ethanol (3:1, 8 h, rt) to cleave *N*-benzoyl and 2'-*O*-(2-chlorobenzoyl) groups. Oligonucleotides were purified by reverse phase HPLC as described previously (Figure S1).<sup>7</sup> The composition of the synthesized (UfA)<sub>6</sub> was confirmed by MALDI-TOF mass spectroscopy *m/z* calculated (M-1) 3453.8, *m/z* obtained 3453.5.

<sup>5</sup> Westman, E.; Sigurdsson, S.; Stawinski, J.; Strömberg, R. *Nucleic Acids Sym Ser.* **1994**, *31*, 25. Strömberg, R., Stawinski, J. *Current Protocols in Nucleic Acid Chemistry*, unit 3.4. John Wiley & Sons, Inc.: New York, 2000. Rozners, E.; Renhofa, R.; Petrova, M.; Popelis, Y.; Kumpins, V.; Bizdena, E. *Nucleosides Nucleotides* **1992**, *11*, 1579-1593.

<sup>6</sup> Rozners, E.; Strömberg, R. *J. Org. Chem.* **1997**, *62*, 1846-1850. Rozners, E.; Katkevica, D.; Strömberg, R. *ChemBioChem* **2007**, *8*, 537-545.

<sup>7</sup> Rozners, E.; Moulder, J. *Nucleic Acids Res.* **2004**, *32*, 248-254.

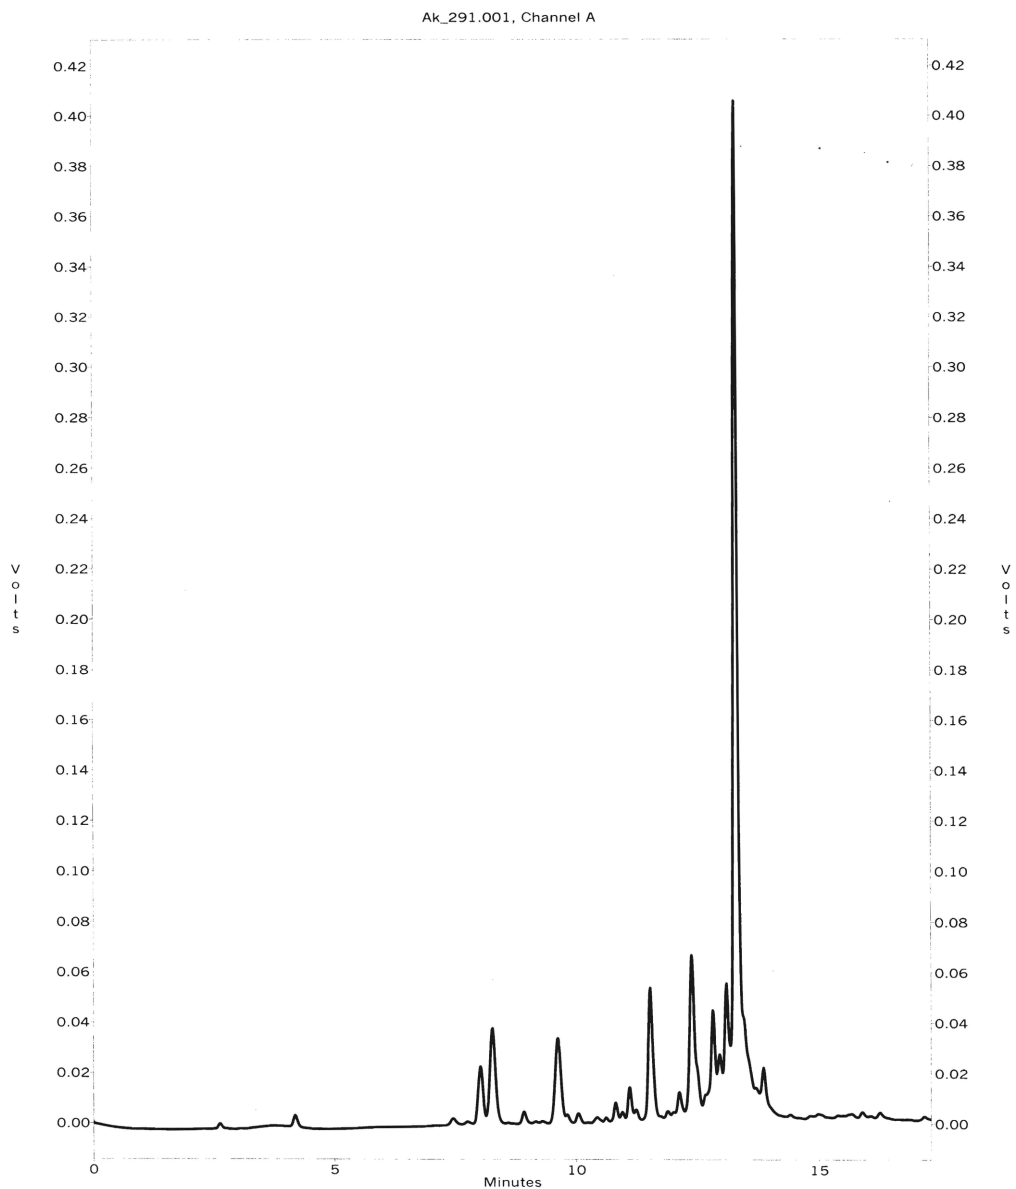

**Figure S1.** RP HPLC trace of crude synthesis mixture of (UfA)<sub>6</sub>. Conditions: Discovery® HS C18 column (4.6 × 250 mm, 3 μm) at 50 °C, linear gradient of acetonitrile (2-40 % in 40 min) in 50 mM triethylammonium acetate buffer (pH 6.5), flow rate 1 mL/min.

**5'-O-(*tert*-Butyldiphenylsilyl)-3'-O-methylthiomethylthymidine** was prepared following the procedure described by Quaedflieg et al.<sup>8</sup> Purification by silica gel column chromatography (hexanes/ethyl acetate, stepwise 9:1 to 4:6) gave the title compound in 76% yield. TLC  $R_f$  = 0.56 (hexanes/ethyl acetate, 1:1). <sup>1</sup>H NMR (CDCl<sub>3</sub>, 300 MHz)  $\delta$  9.57 (bs, 1H), 7.69-7.36 (m, 11H), 6.34 (q, 1H), 4.60 (m, 3H), 4.09-3.80 (m, 3H), 2.45 (m, 1H), 2.16-2.04 (m, 1H), 2.11 (s, 3H), 1.66 (s, 3H), 1.10 (s, 9H). <sup>13</sup>C NMR (CDCl<sub>3</sub>, 75.4 MHz)  $\delta$  170.7, 164.4, 135.8, 135.6, 135.5, 130.4, 130.3, 128.2, 111.4, 85.2, 85.1, 76.3, 73.9, 64.3, 38.1, 27.2, 19.6, 14.0, 12.3.

**Thymidine dibutylphosphate 7** was prepared from 5'-O-(*tert*-butyldiphenylsilyl)-3'-O-methylthiomethylthymidine following the procedure described by Quaedflieg et al.<sup>5</sup> Purification by silica gel column chromatography (methanol in dichloromethane, stepwise 0 to 3%, containing 0.1% of triethylamine) gave **7** in 81% yield. TLC  $R_f$  = 0.56 (dichloromethane/methanol, 19:1). <sup>1</sup>H NMR (CDCl<sub>3</sub>, 300 MHz)  $\delta$  9.32 (bs, 1H), 7.70-7.35 (m, 11H), 6.32 (q, 1H), 5.18 (m, 2H), 4.55 (d, 1H), 4.15-3.83 (m, 7H), 2.52 (m, 1H), 2.15 (m, 1H), 1.62 (m, 4H), 1.59 (s, 3H), 1.37 (m, 4H), 1.08 (s, 9H), 0.90 (t, 6H). <sup>13</sup>C NMR (CDCl<sub>3</sub>, 75.4 MHz)  $\delta$  160.1, 150.6, 135.7, 135.5, 133.3, 132.5, 130.3, 128.2, 111.5, 91.5, 85.1, 84.7, 79.6, 67.9, 64.2, 38.5, 32.5, 32.4, 27.2, 19.6, 18.8, 13.7, 12.2.

**Dimer 9** was prepared by coupling thymidine dibutylphosphate (**7**) with *N*-benzoyl-3'-O-*tert*-butyldimethylsilyldeoxyadenosine (**8**, prepared as described by Zhu et al.<sup>3</sup>) following the procedures by Quaedflieg et al.<sup>5</sup> Purification by silica gel column chromatography (methanol in dichloromethane, stepwise 0 to 3%) gave dimer **9** in 43% yield. TLC  $R_f$  = 0.49 (dichloromethane/methanol, 19:1). MS (ESI+)  $m/z$  (M+H) 962.0 (calc. 962.4). <sup>1</sup>H NMR (CDCl<sub>3</sub>, 300 MHz)  $\delta$  9.74 (bs, 1H), 9.59 (bs, 1H), 8.79 (s, 1H), 8.29 (s, 1H), 8.05 (d, 2H), 7.65-7.33 (m, 14H), 6.47 (t, 1H), 6.25 (q, 1H), 4.73 (s, 2H), 4.60 (q, 1H), 4.33 (m, 1H), 4.10 (q, 1H), 4.02 (m, 1H), 3.94-3.68 (m, 4H), 2.77 (m, 1H), 2.45 (m, 2H), 2.06 (m, 1H), 1.55 (s, 3H), 1.06 (m, 9H), 0.90 (s, 9H), 0.08 (2s, 6H). <sup>13</sup>C NMR (CDCl<sub>3</sub>, 75.4 MHz)  $\delta$  165.4, 164.2, 152.7, 151.9, 150.7, 150.0, 142.1, 35.7, 135.5, 135.4, 133.8, 133.1, 132.8, 132.6, 130.3, 128.8, 128.5, 128.2, 124.0, 111.3, 95.8, 86.3, 85.4, 84.8, 84.7, 78.7, 72.1, 68.2, 64.2, 40.9, 38.9, 27.2, 25.9, 19.6, 18.2, 12.1, -4.4, -4.6.

**Dimer 10.** Dimer **9** (475 mg, 0.49 mmol) was dissolved in dry THF (8 mL) and TBAF (2 mL) was added. The mixture was stirred for 1 h (TLC MeOH/CH<sub>2</sub>Cl<sub>2</sub> 1:19) and quenched with saturated aqueous NaHCO<sub>3</sub> (1 mL). The mixture was evaporated, dissolved in water (50 mL) and extracted with

<sup>8</sup> Quaedflieg, P. J. L. M.; Timmers, C. M.; van der Marel, G. A.; Kuyl-Yeheskiely, E.; van Boom, J. H. *Synthesis* **1993**, 627.

CH<sub>2</sub>Cl<sub>2</sub> (50 mL) and ethyl acetate (50 mL). The aqueous layer was evaporated until 10 mL and purified on C18 reverse-phase silica gel column (27 × 50 mm) eluting with stepwise gradient of methanol (0 to 60 % in 10 % steps) in water. The fractions containing the product were evaporated and purified using silica gel column chromatography (methanol in dichloromethane, stepwise 0 to 12%) to give dimer **10** (150 mg, 50%). TLC R<sub>f</sub> = 0.14 (dichloromethane/methanol, 19:1). MS (ESI+) *m/z* (M+H) 609.8 (calc. 610.2). <sup>1</sup>H NMR (CDCl<sub>3</sub>, 360 MHz) δ 11.2 (bs, 2H), 8.75 (s, 1H), 8.63 (s, 1H), 8.05 (m, 2H), 7.96-7.52 (m, 4H), 6.51 (t, 1H), 6.12 (m, 1H), 5.47 (d, 1H), 5.06 (m, 1H), 4.72 (s, 2H), 4.49 (m, 1H), 4.28, (m, 1H), 4.04 (m, 1H), 3.88, (m, 1H), 3.78-3.66 (m, 2H), 3.53 (m, 2H), 2.89 (m, 1H), 2.41 (m, 1H), 2.25-2.06 (m, 2H), 1.76 (s, 3H). <sup>13</sup>C NMR (CDCl<sub>3</sub>, 90.5 MHz) δ 165.7, 163.7, 152.0, 151.6, 150.4, 150.3, 143.0, 135.9, 133.4, 132.4, 128.5, 125.8, 109.5, 94.0, 85.7, 85.0, 83.8, 83.5, 76.8, 70.9, 68.0, 61.2, 36.8, 12.2.

**Dimer 11** was prepared using the standard tritylation procedure. Dimer **10** (208 mg, 0.34 mmol) was coevaporated with dry pyridine (3 × 25 mL) and dissolved in dry pyridine (20 mL). Dimethoxytritylchloride (128 mg, 0.38 mmol) was added and the reaction mixture was stirred overnight. Ethanol (2 mL) was added and the mixture was evaporated to syrup. The residue was dissolved in methylene chloride (50 mL) and extracted with saturated aqueous NaHCO<sub>3</sub> (50 mL), the organic phase was dried over Na<sub>2</sub>SO<sub>4</sub> and concentrated. Silica gel column chromatography (stepwise gradient of MeOH in CH<sub>2</sub>Cl<sub>2</sub> containing 0.2% of NEt<sub>3</sub>, 0 to 7% in 1% steps) yielded 232 mg (0.255 mmol, 75%) of dimer **11**. MS (ESI+) *m/z* (M+H) 911.9 (calc. 912.4). <sup>1</sup>H NMR (CDCl<sub>3</sub>, 360 MHz) δ 9.62 (bs, 1H), 8.75 (s, 1H), 8.29 (s, 1H), 8.02 (m, 2H), 7.57-7.16 (m, 13H), 6.80 (m, 4H), 6.50 (t, 1H), 6.27 (m, 1H), 4.73 (m, 2H), 4.57 (m, 1H), 4.35 (m, 1H), 4.22-4.10 (m, 3H), 3.86 and 3.72 (m, 2H), 3.74 (s, 6H), 3.46 and 3.27 (m, 2H), 2.76 (m, 1H), 2.54 (m, 2H), 2.20 (m, 1H), 1.42 (s, 3H).

**Dimer 12** was prepared from dimer **11** following the literature procedure<sup>9</sup> and purified by silica gel column chromatography (stepwise gradient of methanol 0 to 5% in dichloromethane containing 2% of triethylamine) gave **12** as a mixture of two diastereomers in 50% yield. TLC R<sub>f</sub> = 0.57 and 0.50 (dichloromethane/methanol/triethylamine, 93:5:2). MS (ESI+) did not give the molecular peak of **12**, instead we observed the hydrolysis product (loss of diisopropylamine) *m/z* (M+H) 1028.8 (calc. 1029.4). <sup>1</sup>H NMR (CD<sub>3</sub>CN, 360 MHz, mixture of diastereomers) δ 9.18 (bs, 1H), 7.98 (2s, 1H), 7.66 (2s, 1H), 7.34 (d, 2H), 7.08 (m, 1H), 6.98-6.94 (m, 2H), 6.85 (m, 2H), 6.76 (m, 3H), 6.65-6.52 (m, 6H),

<sup>9</sup> de Koning, M. C.; Ghisaidoobe, A. B. T.; Duynstee, H. I.; Ten Kortenaar, P. B. W.; Filippov, D. V.; van der Marel, G. A. *Org. Process Res. Dev.* **2006**, *10*, 1238-1245.



6.19 (d, 4H), 5.83 (m, 1H), 5.47 (m, 1H), 4.16-4.06 (m, 3H), 3.77 (m, 1H), 3.63 (m, 1H), 3.60-3.51 (m, 7H), 3.33 (m, 1H), 3.07 (s, 6H), 3.20-2.98 (m, 6H), 2.57 (m, 2H), 2.33-2.23 (m, 1H), 2.02 (t, 3H), 2.02-1.90 (m, 1H), 1.72-1.53 (m, 2H), 1.31 (m, 2H), 0.56 (m, 12 H).  $^{31}\text{P}$  NMR ( $\text{CD}_3\text{CN}$ , 121 MHz)  $\delta$  149.6 and 149.5.

**Synthesis of formacetal modified DNA** was done on Expedite 8909 DNA synthesizer following the standard DNA coupling protocol. The coupling yield for dimer **12** was ca. 95%. The modified DNA was cleaved from support and deprotected using standard DNA procedures and purified by reverse-phase HPLC as described above. The composition of the synthesized DNA was confirmed by MALDI-TOF mass spectroscopy: **OL4**  $m/z$  calculated (M-1) 3345.6,  $m/z$  obtained 3345.0 and **OL6**  $m/z$  calculated (M-1) 4013.8,  $m/z$  obtained 4013.7. The control all DNA **OL5** was purchased from Thermo-Fisher.

**Circular Dichroism Spectra** were collected on a Jasco 810 spectropolarimeter at room temperature. Oligonucleotide concentrations were 8  $\mu\text{M}$  in 10 mM sodium phosphate (pH 7.4) and 300 mM NaCl. The result is an average of 10 scans.

**Table S2.** Experimental  $t_m$  and thermodynamic data for melting of r(UfA)<sub>6</sub> OL2.

| Experiment             | 0%          | 5%          | 10%         | 15%         | 20%         | $\Delta H$              | $\Delta S(\text{eu})$ | T1    | T2    | $\Delta H$                             | $\Delta G$ |
|------------------------|-------------|-------------|-------------|-------------|-------------|-------------------------|-----------------------|-------|-------|----------------------------------------|------------|
|                        |             |             |             |             |             | van't Hoff<br>(cal/mol) |                       |       |       | $\delta\alpha/\delta T_m$<br>(cal/mol) |            |
| <b>Ethylene glycol</b> |             |             |             |             |             |                         |                       |       |       |                                        |            |
| er233A                 | 38.5        | 37.0        | 35.7        | 34.5        | 32.9        | 84500                   | 245                   | 32.18 | 44.72 | 78480                                  | 8.5        |
| er233B                 | 38.1        | 36.9        | 35.7        | 34.4        |             | 78700                   | 227                   | 31.82 | 44.64 | 76656                                  | 8.3        |
| er233C                 | 38.2        | 36.7        | 36.0        | 34.8        | 33.1        | 84000                   | 244                   | 32.03 | 44.67 | 77809                                  | 8.3        |
| er233C                 | 38.3        | 36.8        | 35.8        | 34.7        | 33.1        | 81800                   | 237                   | 32.06 | 44.91 | 76602                                  | 8.3        |
| er233D                 | 38.3        | 36.9        | 35.9        | 34.8        | 33.0        | 81100                   | 234                   | 31.94 | 44.91 | 75864                                  | 8.5        |
| er233E                 | 38.3        | 36.9        | 35.8        | 34.5        | 33.3        | 82200                   | 238                   | 32.03 | 44.80 | 77048                                  | 8.4        |
| er233E                 | 38.4        | 36.7        | 35.8        | 34.6        | 33.2        | 83800                   | 243                   | 32.19 | 44.92 | 77360                                  | 8.4        |
| er233E                 | 38.4        | 37.0        | 35.8        | 34.6        | 33.2        | 82600                   | 239                   | 32.10 | 44.82 | 77374                                  | 8.5        |
| er233F                 | 38.3        |             | 36.0        |             | 32.9        | 82400                   | 238                   | 32.05 | 44.79 | 77232                                  | 8.6        |
| <b>Average</b>         |             | <b>36.9</b> | <b>35.8</b> | <b>34.6</b> | <b>33.1</b> |                         |                       |       |       |                                        |            |
| <b>St deviation</b>    |             | <b>0.1</b>  | <b>0.1</b>  | <b>0.1</b>  | <b>0.1</b>  |                         |                       |       |       |                                        |            |
| <b>Glycerol</b>        |             |             |             |             |             |                         |                       |       |       |                                        |            |
| er234A                 | 38.1        | 36.8        |             | 35.1        | 34.3        | 84500                   | 245                   | 31.89 | 44.59 | 77386                                  | 8.5        |
| er234B                 | 38.3        | 36.7        | 36.2        | 35.1        | 34.4        | 81900                   | 237                   | 32.12 | 44.71 | 78151                                  | 8.4        |
| er234B                 | 38.3        | 37.0        |             | 35.1        | 34.5        | 81500                   | 236                   | 31.92 | 44.85 | 76079                                  | 8.3        |
| er234B                 | 38.4        | 36.9        | 36.3        | 35.1        | 34.2        | 80500                   | 232                   | 31.98 | 44.92 | 76052                                  | 8.5        |
| er234C                 | 38.2        | 37.0        | 36.3        | 35          | 34.6        | 81800                   | 237                   | 31.85 | 44.62 | 76959                                  | 8.3        |
| er234D                 | 38.2        | 36.8        | 36.3        | 35.1        | 34.1        | 81300                   | 235                   | 31.96 | 44.59 | 77833                                  | 8.4        |
| er234D                 | 38.1        | 37.0        | 36.0        |             | 34.5        | 85100                   | 247                   | 31.97 | 44.61 | 77779                                  | 8.5        |
| er234E                 |             |             | 36.2        | 35.1        | 34.2        |                         |                       |       |       |                                        |            |
| er234E                 |             |             | 36.4        |             | 34.4        |                         |                       |       |       |                                        |            |
| er234E                 |             | 37.1        |             | 35.0        | 34.1        |                         |                       |       |       |                                        |            |
| er234F                 |             | 36.9        |             |             | 34.2        |                         |                       |       |       |                                        |            |
| er234F                 |             | 37.2        | 36.1        | 34.9        | 34.4        |                         |                       |       |       |                                        |            |
| <b>Average</b>         |             | <b>36.9</b> | <b>36.2</b> | <b>35.1</b> | <b>34.3</b> |                         |                       |       |       |                                        |            |
| <b>St deviation</b>    |             | <b>0.2</b>  | <b>0.1</b>  | <b>0.1</b>  | <b>0.2</b>  |                         |                       |       |       |                                        |            |
| <b>Acetamide</b>       |             |             |             |             |             |                         |                       |       |       |                                        |            |
| er235A/E               | 38.2        | 33.6        | 31.2        | 28.2        | 23.7        | 81600                   | 236                   | 31.83 | 44.64 | 76719                                  | 8.4        |
| er235A/E               | 38.1        | 33.9        | 31.3        | 28.2        | 23.4        | 81700                   | 236                   | 31.83 | 44.58 | 77065                                  | 8.5        |
| er235A/E               | 38.2        | 33.7        | 31.3        | 28.2        | 23.6        | 82500                   | 239                   | 31.85 | 44.71 | 76442                                  | 8.4        |
| er235B/G               | 38.4        | 33.6        | 31.3        | 28.2        | 23.5        | 79200                   | 228                   | 32.02 | 44.86 | 76640                                  | 8.5        |
| er235B/G               | 38.1        | 33.5        | 31.4        | 28.1        | 23.4        | 83900                   | 243                   | 31.91 | 44.74 | 76643                                  | 8.5        |
| er235B/G               | 38.2        | 33.6        | 31.4        | 28.1        |             | 82700                   | 240                   | 31.87 | 44.77 | 76224                                  | 8.3        |
| er235C                 | 38.4        | 33.7        | 31.1        |             | 23.6        | 80700                   | 233                   | 32.05 | 44.82 | 77058                                  | 8.4        |
| er235D                 | 38.3        | 33.6        | 31.4        |             |             | 83500                   | 242                   | 32.07 | 44.81 | 77242                                  | 8.4        |
| er235D                 | 38.4        | 33.7        | 30.8        |             |             | 82000                   | 237                   | 32.24 | 44.79 | 78450                                  | 8.5        |
| er235D                 | 38.4        |             | 30.8        |             |             | 81500                   | 235                   | 32.08 | 44.78 | 77481                                  | 8.6        |
| er235F                 |             |             | 31.3        | 28.2        |             |                         |                       |       |       |                                        |            |
| <b>Average</b>         | <b>38.3</b> | <b>33.7</b> | <b>31.2</b> | <b>28.2</b> | <b>23.5</b> | <b>82192</b>            | <b>238</b>            |       |       | <b>77101</b>                           | <b>8.4</b> |
| <b>St deviation</b>    | <b>0.1</b>  | <b>0.1</b>  | <b>0.2</b>  | <b>0.05</b> | <b>0.1</b>  | <b>1554</b>             | <b>5</b>              |       |       | <b>711</b>                             | <b>0.1</b> |

**Table S3.** Experimental  $t_m$  and thermodynamic data for melting of dCG(TA)<sub>5</sub>CG OL5.

| Experiment             | 0%          | 5%          | 10%         | 15%         | 20%         | $\Delta H$              | $\Delta S(\text{eu})$ | T1    | T2    | $\Delta H$                             | $\Delta G$ |
|------------------------|-------------|-------------|-------------|-------------|-------------|-------------------------|-----------------------|-------|-------|----------------------------------------|------------|
|                        |             |             |             |             |             | van't Hoff<br>(cal/mol) |                       |       |       | $\delta\alpha/\delta T_m$<br>(cal/mol) |            |
| <b>Ethylene glycol</b> |             |             |             |             |             |                         |                       |       |       |                                        |            |
| es063A/062C            | 46.2        | 45.5        | 44.2        | 42.9        | 40.9        | 40900                   | 101.2                 | 27.92 | 61.65 | 30302                                  | 9.5        |
| es063A/062D            | 46.7        | 46.0        | 44.5        | 42.9        | 40.5        | 35200                   | 84.0                  | 27.96 | 63.65 | 28813                                  | 9.1        |
| es063A/062E            | 45.4        | 44.3        |             | 40.9        |             |                         |                       |       |       |                                        |            |
| es063A/062E            |             | 44.3        |             | 40.4        |             |                         |                       |       |       |                                        |            |
| es063B/062E            | 45.4        | 43.8        | 42.9        | 40.2        |             |                         |                       |       |       |                                        |            |
| es063C/062E            | 44.9        | 43.8        | 42.6        | 40.1        |             |                         |                       |       |       |                                        |            |
| es063D/062F            | 44.8        | 44.0        | 42.5        | 40.5        |             |                         |                       |       |       |                                        |            |
| es063D/062F            | 45.0        | 44.0        |             | 41.0        |             |                         |                       |       |       |                                        |            |
| es063D/062F            | 44.7        | 44.0        |             | 40.7        |             |                         |                       |       |       |                                        |            |
| es063D                 |             |             | 43.6        |             |             |                         |                       |       |       |                                        |            |
| es063E                 |             | 44.8        | 44.1        |             |             |                         |                       |       |       |                                        |            |
| <b>Average</b>         |             | <b>45.2</b> | <b>44.1</b> | <b>42.8</b> | <b>40.6</b> |                         |                       |       |       |                                        |            |
| <b>St deviation</b>    |             | <b>0.4</b>  | <b>0.3</b>  | <b>0.2</b>  | <b>0.3</b>  |                         |                       |       |       |                                        |            |
| <b>Glycerol</b>        |             |             |             |             |             |                         |                       |       |       |                                        |            |
| es062C/063A            | 46.2        | 45.6        | 44.0        | 43.2        |             | 40600                   | 101.0                 | 28.25 | 60.49 | 31627                                  | 9.3        |
| es062D/063A/C          | 45.4        | 45.5        | 42.6        |             |             | 38700                   | 95.6                  | 28.46 | 60.55 | 31803                                  | 9.0        |
| es062E/G/063D          | 44.9        | 42.5        | 43.2        | 40.1        |             |                         |                       |       |       |                                        |            |
| es062E/G/063D          | 45.6        | 43.5        | 43.7        | 40.7        |             |                         |                       |       |       |                                        |            |
| es062E/G/064A          | 45.6        | 43.9        | 43.7        | 40.2        |             |                         |                       |       |       |                                        |            |
| es062E/G/064A          | 45.2        | 42.8        | 43.2        | 40.1        |             |                         |                       |       |       |                                        |            |
| es062F/064A            | 46.0        |             | 43.6        | 43.0        | 40.1        | 37100                   | 90.3                  | 28.03 | 61.68 | 30388                                  | 9.1        |
| es062F/064B            | 46.8        |             | 43.6        | 42.9        | 40.4        | 36300                   | 87.4                  | 28.81 | 63.71 | 29554                                  | 9.2        |
| es062F/064C            |             | 43.7        | 42.9        | 40.5        |             |                         |                       |       |       |                                        |            |
| <b>Average</b>         |             | <b>45.4</b> | <b>43.4</b> | <b>43.2</b> | <b>40.3</b> |                         |                       |       |       |                                        |            |
| <b>St deviation</b>    |             | <b>0.3</b>  | <b>0.6</b>  | <b>0.3</b>  | <b>0.2</b>  |                         |                       |       |       |                                        |            |
| <b>Acetamide</b>       |             |             |             |             |             |                         |                       |       |       |                                        |            |
| es064A                 |             | 44.3        |             | 37.2        | 34.1        |                         |                       |       |       |                                        |            |
| es064A                 | 46.2        | 44.0        | 39.0        | 36.8        | 33.8        | 36500                   | 88.3                  | 28.41 | 62.82 | 29856                                  | 9.1        |
| es064A                 | 46.0        | 44.1        | 40.6        | 37.5        | 33.3        | 36700                   | 88.9                  | 28.24 | 61.56 | 30699                                  | 9.1        |
| es064A                 |             | 43.9        |             | 37.1        | 33.2        |                         |                       |       |       |                                        |            |
| es064B                 | 46.3        | 43.3        | 39.1        | 36.6        | 34.0        | 39400                   | 97.1                  | 28.84 | 60.53 | 32243                                  | 9.3        |
| es064C                 |             | 43.8        | 40.1        | 37.2        | 33.3        |                         |                       |       |       |                                        |            |
| es064C                 |             | 43.8        | 40.2        | 37.5        | 33.6        |                         |                       |       |       |                                        |            |
| es064C                 |             | 43.6        | 40.4        | 37.7        | 33.4        |                         |                       |       |       |                                        |            |
| es064C                 |             | 43.4        | 40.2        | 37.7        | 33.7        |                         |                       |       |       |                                        |            |
| <b>Average</b>         | <b>46.2</b> | <b>43.8</b> | <b>39.9</b> | <b>37.3</b> | <b>33.6</b> | <b>37933</b>            | <b>93</b>             |       |       | <b>30587</b>                           | <b>9.2</b> |
| <b>St deviation</b>    | <b>0.4</b>  | <b>0.3</b>  | <b>0.6</b>  | <b>0.4</b>  | <b>0.3</b>  | <b>2033</b>             | <b>6</b>              |       |       | <b>1128</b>                            | <b>0.1</b> |

**Table S4.** Experimental  $t_m$  and thermodynamic data for melting of dCG(TfA)<sub>5</sub>CG OL6.

| Experiment             | 0%          | 5%          | 10%         | 15%         | 20%         | $\Delta H$              | $\Delta S(\text{eu})$ | T1    | T2    | $\Delta H$                             | $\Delta G$ |
|------------------------|-------------|-------------|-------------|-------------|-------------|-------------------------|-----------------------|-------|-------|----------------------------------------|------------|
|                        |             |             |             |             |             | van't Hoff<br>(cal/mol) |                       |       |       | $\delta\alpha/\delta T_m$<br>(cal/mol) |            |
| <b>Ethylene glycol</b> |             |             |             |             |             |                         |                       |       |       |                                        |            |
| er289A                 | 30.2        | 30.3        | 29.2        | 27.5        | 26.8        | 32300                   | 80.6                  | 16.45 | 43.68 | 34168                                  | 7.3        |
| er289B                 |             | 30.1        | 29.1        | 27.7        |             |                         |                       |       |       |                                        |            |
| er289B                 |             | 29.9        | 28.9        | 27.7        |             |                         |                       |       |       |                                        |            |
| er289B                 |             | 30.0        | 28.7        | 27.6        |             |                         |                       |       |       |                                        |            |
| er289B                 |             | 30.2        | 29.3        | 27.8        |             |                         |                       |       |       |                                        |            |
| er289C                 | 30.8        | 30.7        | 29.6        | 28.0        | 27.0        | 33800                   | 85.3                  |       |       |                                        | 7.3        |
| er289C                 | 30.4        | 30.7        | 29.6        | 28          |             | 33200                   | 83.3                  | 16.17 | 43.56 | 33922                                  | 7.4        |
| er289D                 | 30.8        | 29.7        | 29          | 27.2        | 26.5        | 30900                   | 75.6                  | 16.27 | 43.54 | 34081                                  | 7.5        |
| er289D                 |             | 30.5        | 28.7        | 28.1        | 26.9        |                         |                       |       |       |                                        |            |
| <b>Average</b>         |             | <b>30.2</b> | <b>29.1</b> | <b>27.7</b> | <b>26.8</b> |                         |                       |       |       |                                        |            |
| <b>St deviation</b>    |             | <b>0.4</b>  | <b>0.3</b>  | <b>0.3</b>  | <b>0.2</b>  |                         |                       |       |       |                                        |            |
| <b>Glycerol</b>        |             |             |             |             |             |                         |                       |       |       |                                        |            |
| egmg011A               | 30.3        | 30.4        | 30.2        |             |             | 37000                   | 95.8                  | 16.83 | 43.17 | 35312                                  | 7.3        |
| egmg011A               |             | 30.3        |             |             |             |                         |                       |       |       |                                        |            |
| egmg011B               | 30.0        | 30.7        | 29.2        |             |             | 33300                   | 83.7                  | 16.29 | 43.32 | 34362                                  | 7.3        |
| egmg011B               | 30.5        | 30.8        | 30.1        |             |             | 32000                   | 79.4                  | 16.45 | 43.47 | 34410                                  | 7.4        |
| egmg011B               | 30.6        | 30.7        | 29.9        |             | 28.8        | 32700                   | 81.7                  | 16.42 | 45.39 | 32285                                  | 7.4        |
| egmg011B               |             | 30.1        |             | 28.7        |             |                         |                       |       |       |                                        |            |
| egmg011C               | 30.7        | 30.1        | 29.6        |             | 28.4        | 31000                   | 76                    | 16.48 | 43.15 | 34830                                  | 7.4        |
| egmg011D               |             | 29.6        |             | 28.3        |             |                         |                       |       |       |                                        |            |
| egmg011E               |             | 30.1        | 28.8        | 29          |             |                         |                       |       |       |                                        |            |
| egmg011E               |             |             | 29.5        | 28.3        |             |                         |                       |       |       |                                        |            |
| egmg011F               | 30.0        | 30.3        | 29.7        | 29.0        | 28.2        | 32400                   | 81.0                  | 16.51 | 42.46 | 35722                                  | 7.3        |
| egmg011G               |             | 30.0        | 28.4        | 28.2        |             |                         |                       |       |       |                                        |            |
| egmg011G               |             | 30.2        | 28.6        | 28.6        |             |                         |                       |       |       |                                        |            |
| egmg011G               |             | 30.2        | 28.8        | 28.4        |             |                         |                       |       |       |                                        |            |
| egmg011G               |             | 29.7        | 28.3        | 28.3        |             |                         |                       |       |       |                                        |            |
| <b>Average</b>         |             | <b>30.5</b> | <b>29.9</b> | <b>28.8</b> | <b>28.5</b> |                         |                       |       |       |                                        |            |
| <b>St deviation</b>    |             | <b>0.3</b>  | <b>0.3</b>  | <b>0.4</b>  | <b>0.3</b>  |                         |                       |       |       |                                        |            |
| <b>Acetamide</b>       |             |             |             |             |             |                         |                       |       |       |                                        |            |
| er288A/289A            | 30.1        |             | 27.9        |             | 24.7        | 33300                   | 83.8                  |       |       |                                        | 7.3        |
| er288A/289B            |             | 27.8        |             | 24.9        |             |                         |                       |       |       |                                        |            |
| er288A/289B            | 30.3        |             | 27.5        |             | 25.2        | 34200                   | 86.9                  |       |       |                                        | 7.2        |
| er288B/289B            | 30.8        | 30.6        |             |             | 25          | 31300                   | 77                    |       |       |                                        | 7.4        |
| er288B/289B            | 30.4        | 27.6        |             | 24.8        |             |                         |                       |       |       |                                        |            |
| er288C                 | 30.5        | 29.9        | 27.3        | 26.5        | 25.4        | 33100                   | 82.9                  | 16.26 | 44.5  | 33009                                  | 7.4        |
| er288C/289C            | 30.7        | 29.8        | 27.2        | 26.3        | 24.5        | 31800                   | 78.7                  | 16.25 | 44.24 | 33276                                  | 7.4        |
| er288D                 |             | 29.6        | 27.1        | 26.7        | 25.1        |                         |                       |       |       |                                        |            |
| er288D                 |             | 30.2        | 27.3        | 26.4        | 24.8        |                         |                       |       |       |                                        |            |
| er288D                 |             | 30.1        | 27.2        | 26          | 24.9        |                         |                       |       |       |                                        |            |
| er288D                 |             | 30.5        | 26.9        | 26.1        |             |                         |                       |       |       |                                        |            |
| er288E                 |             |             | 27.1        | 26.3        |             |                         |                       |       |       |                                        |            |
| <b>Average</b>         | <b>30.4</b> | <b>30.1</b> | <b>27.4</b> | <b>26.3</b> | <b>24.9</b> | <b>32820</b>            | <b>82</b>             |       |       | <b>34125</b>                           | <b>7.4</b> |
| <b>St deviation</b>    | <b>0.3</b>  | <b>0.4</b>  | <b>0.3</b>  | <b>0.2</b>  | <b>0.3</b>  | <b>1524</b>             | <b>5</b>              |       |       | <b>999</b>                             | <b>0.1</b> |

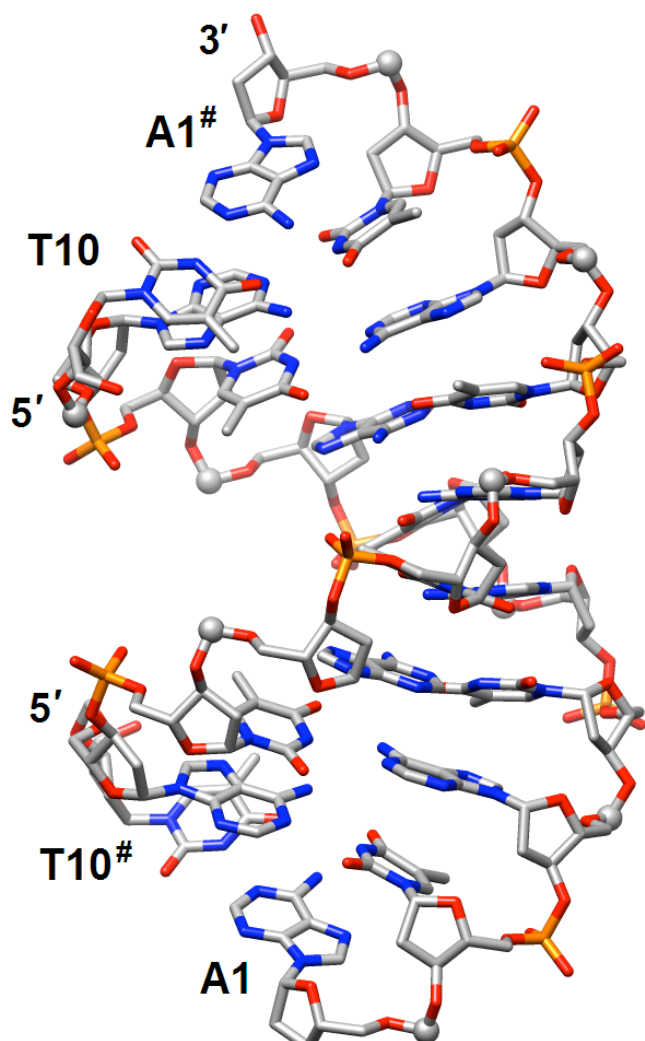

**Figure S2.** Modeled duplex  $[d(\text{TfApTfApTfApTfApTfApTfA})_2]$  (**OL4**). The formacetal carbon is highlighted with a sphere and the hash symbol indicates the complementary strand. The model was built manually in Turbo-Frodo using the T4fA5 dimer co-ordinates from the crystal structure of the sequence **OL7**. The energy minimization was carried out using the program MOE (MOE 2008.10; The Chemical Computing Group Inc.) with parameters from the *AMBER* force-field.

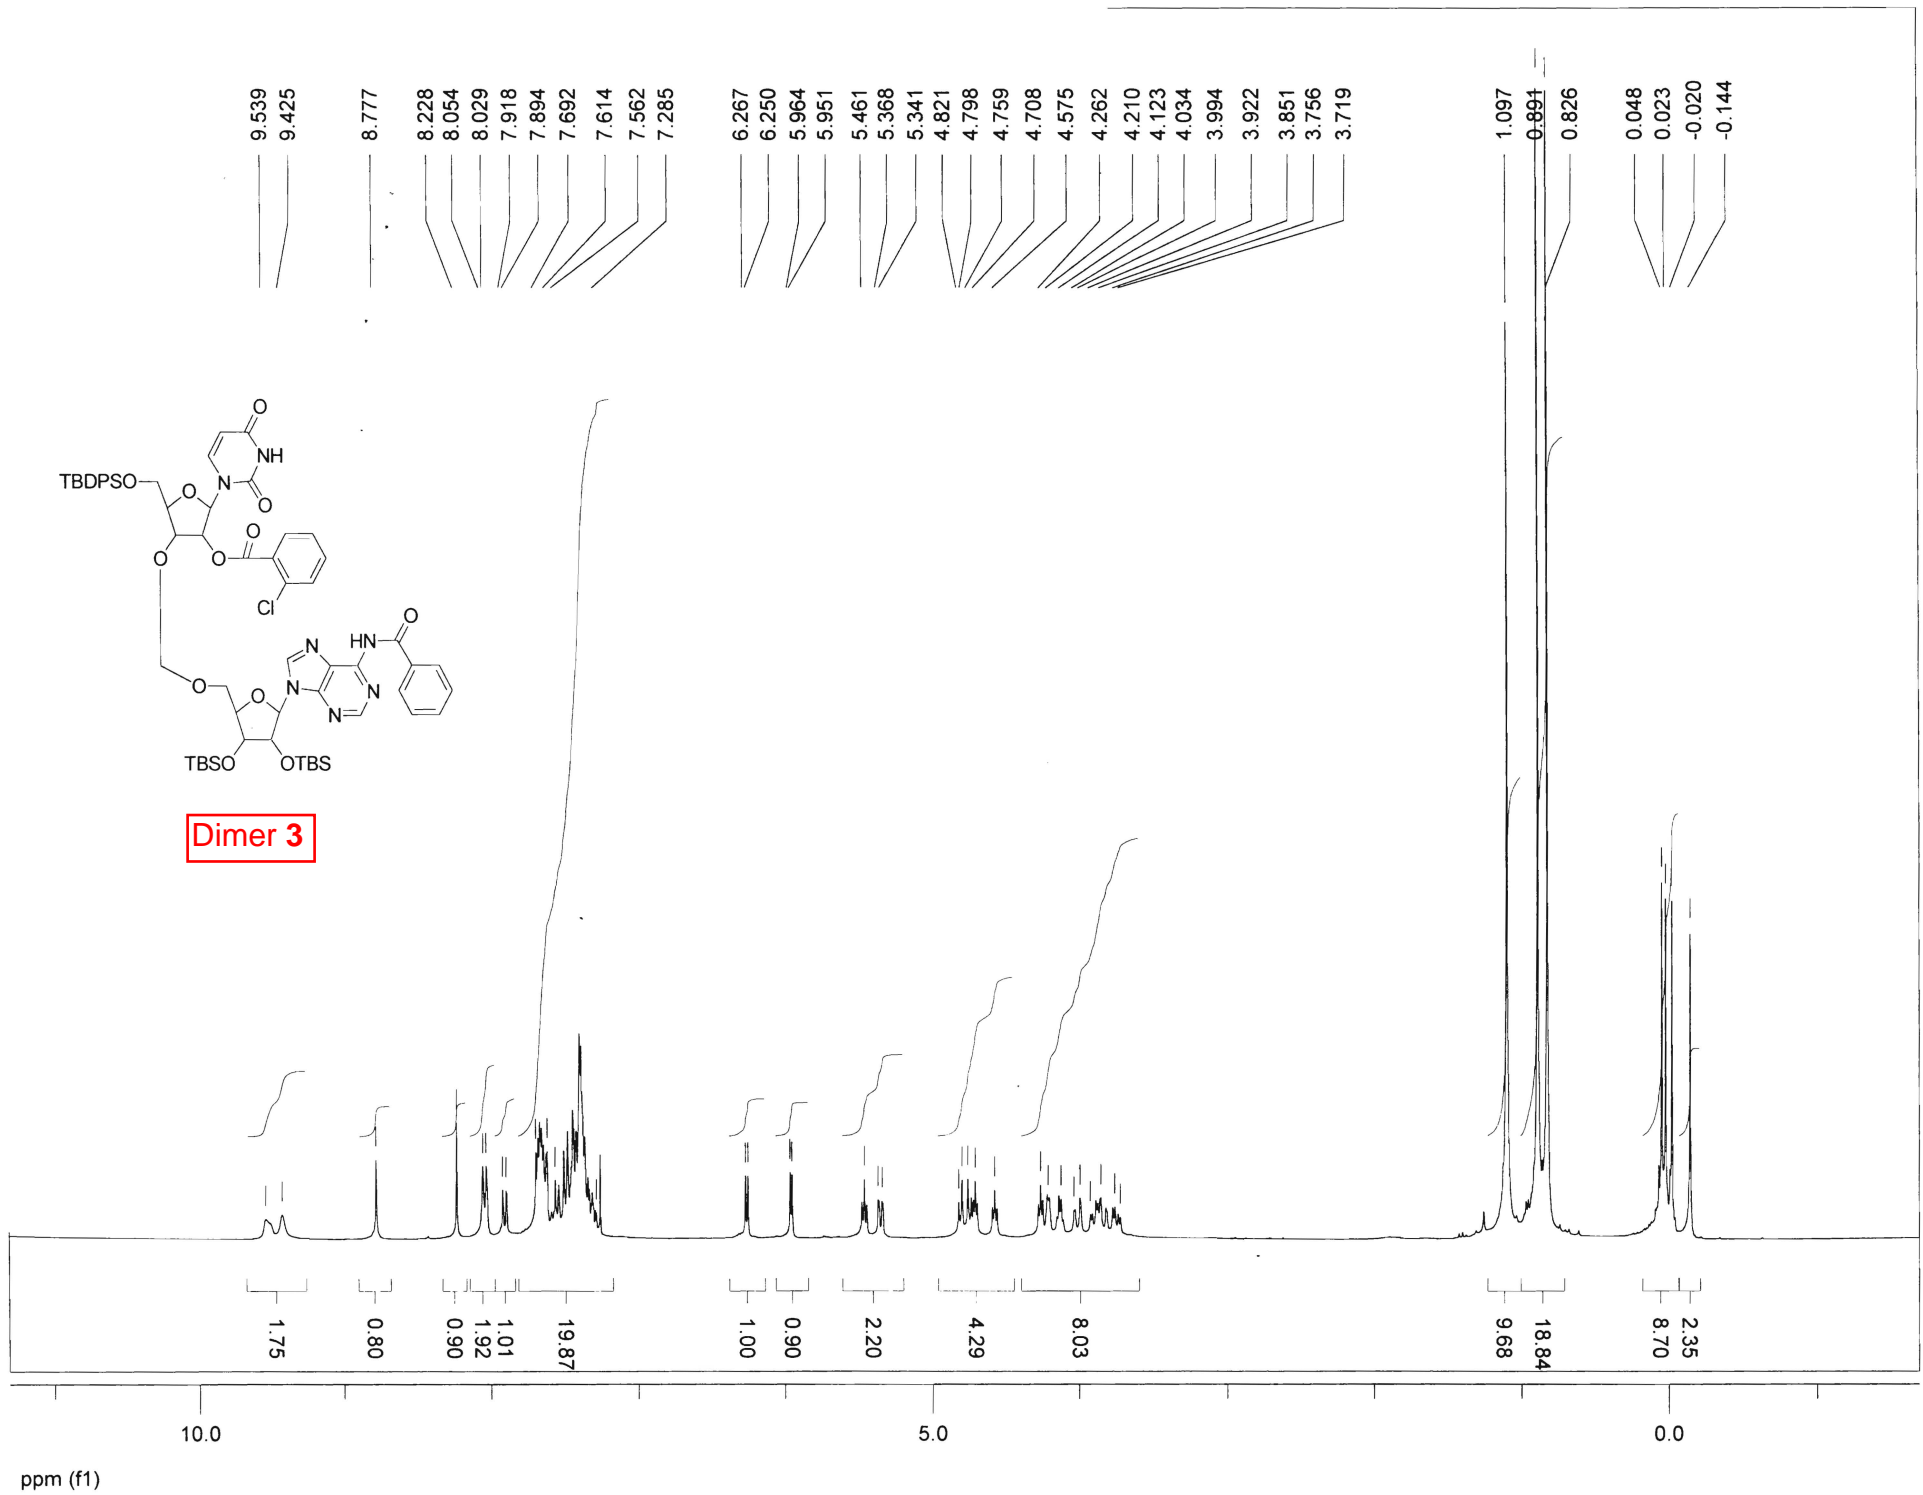

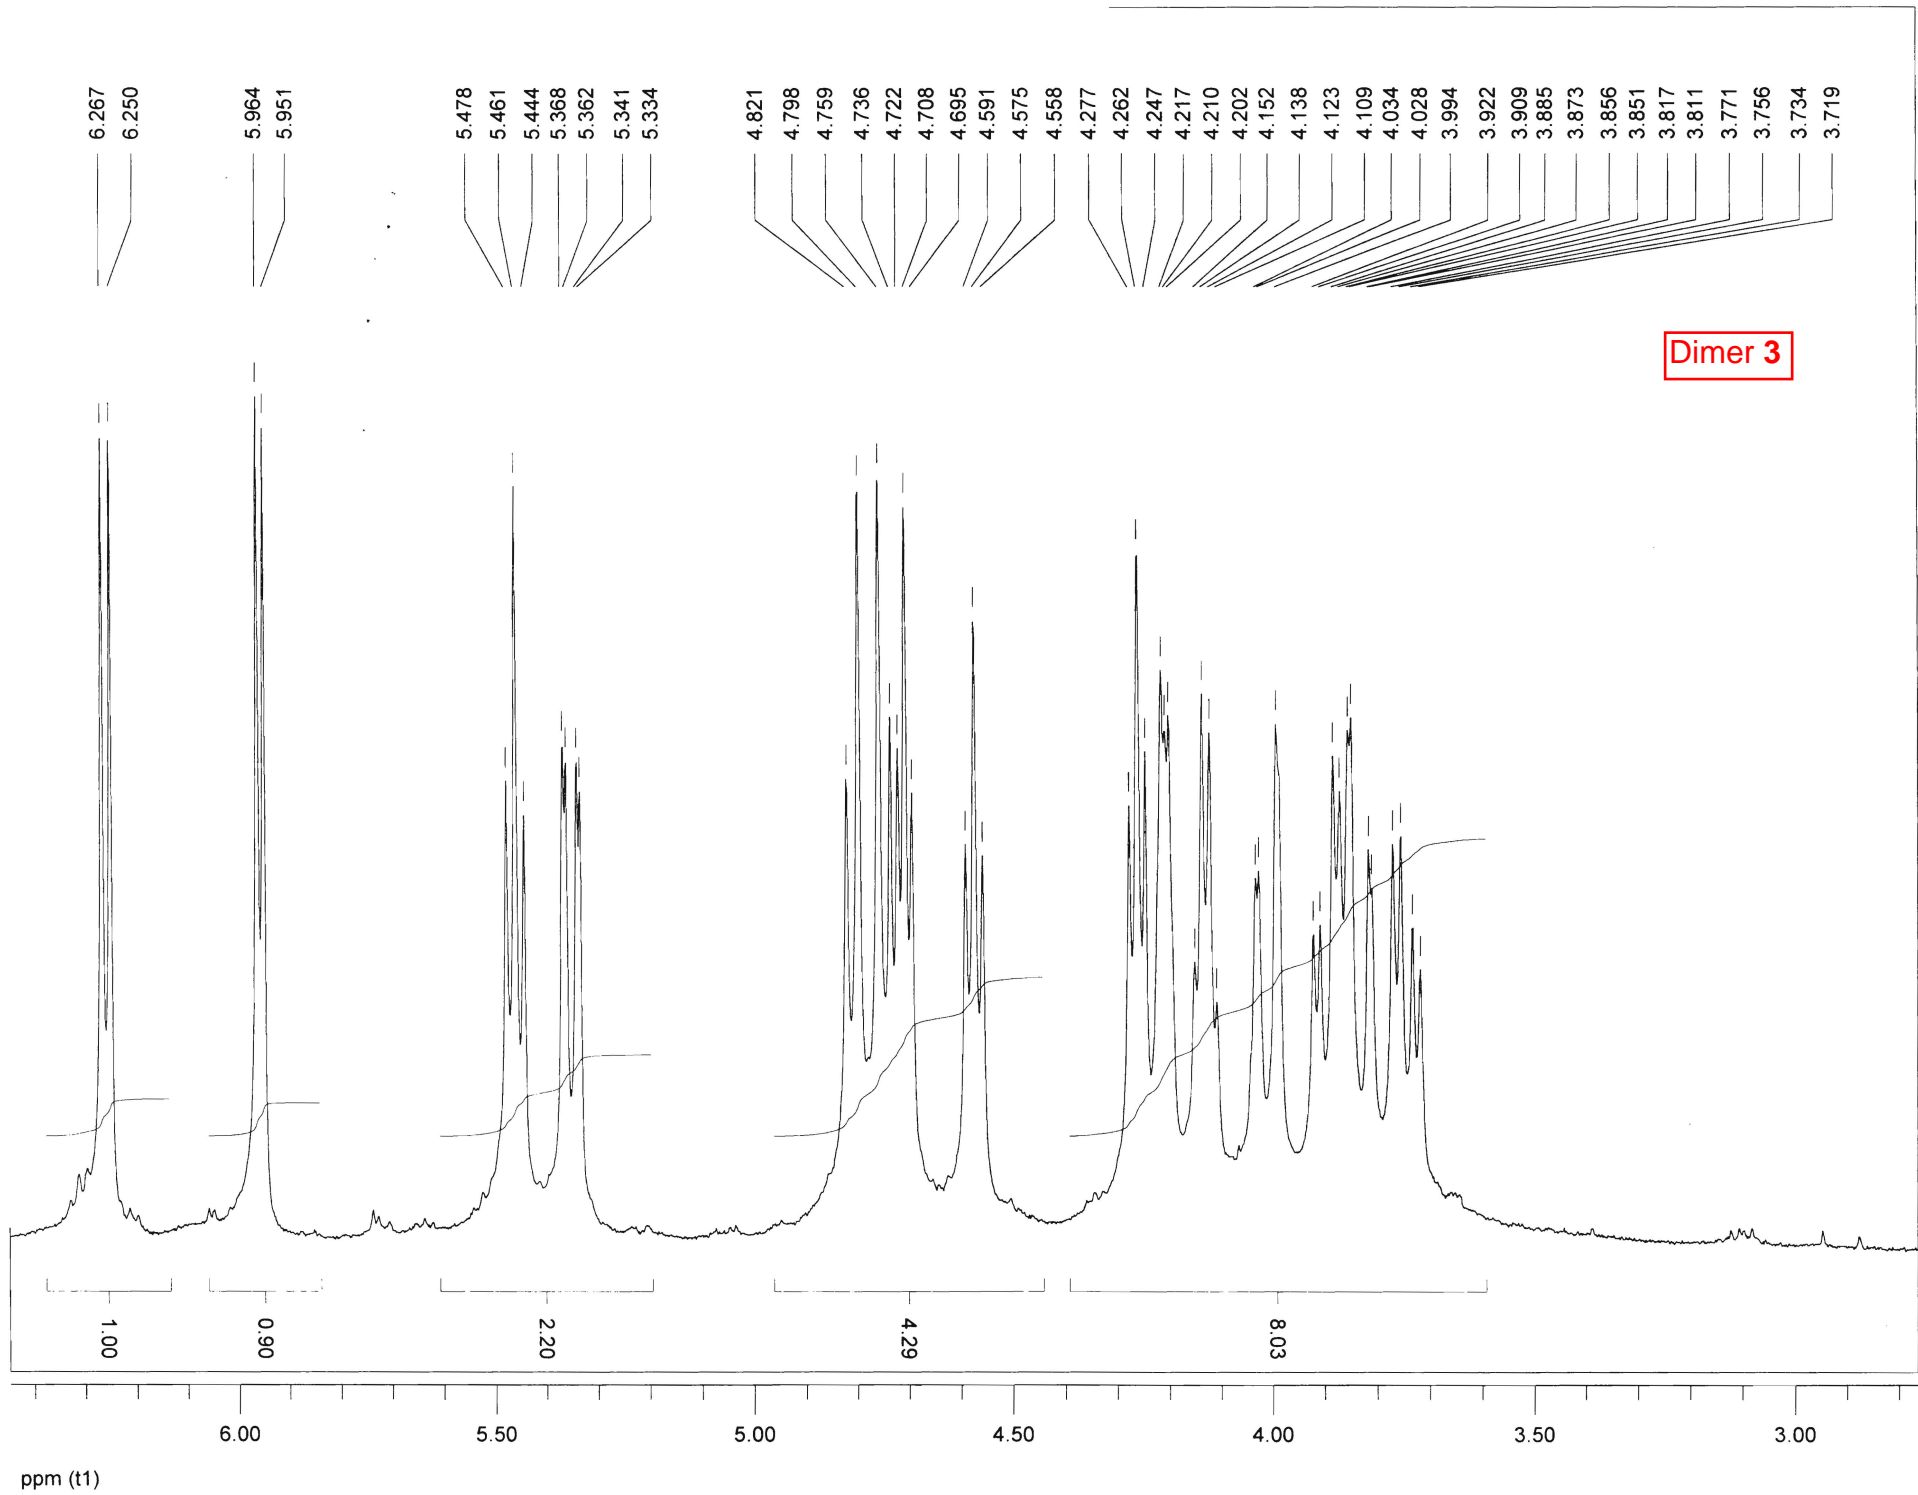

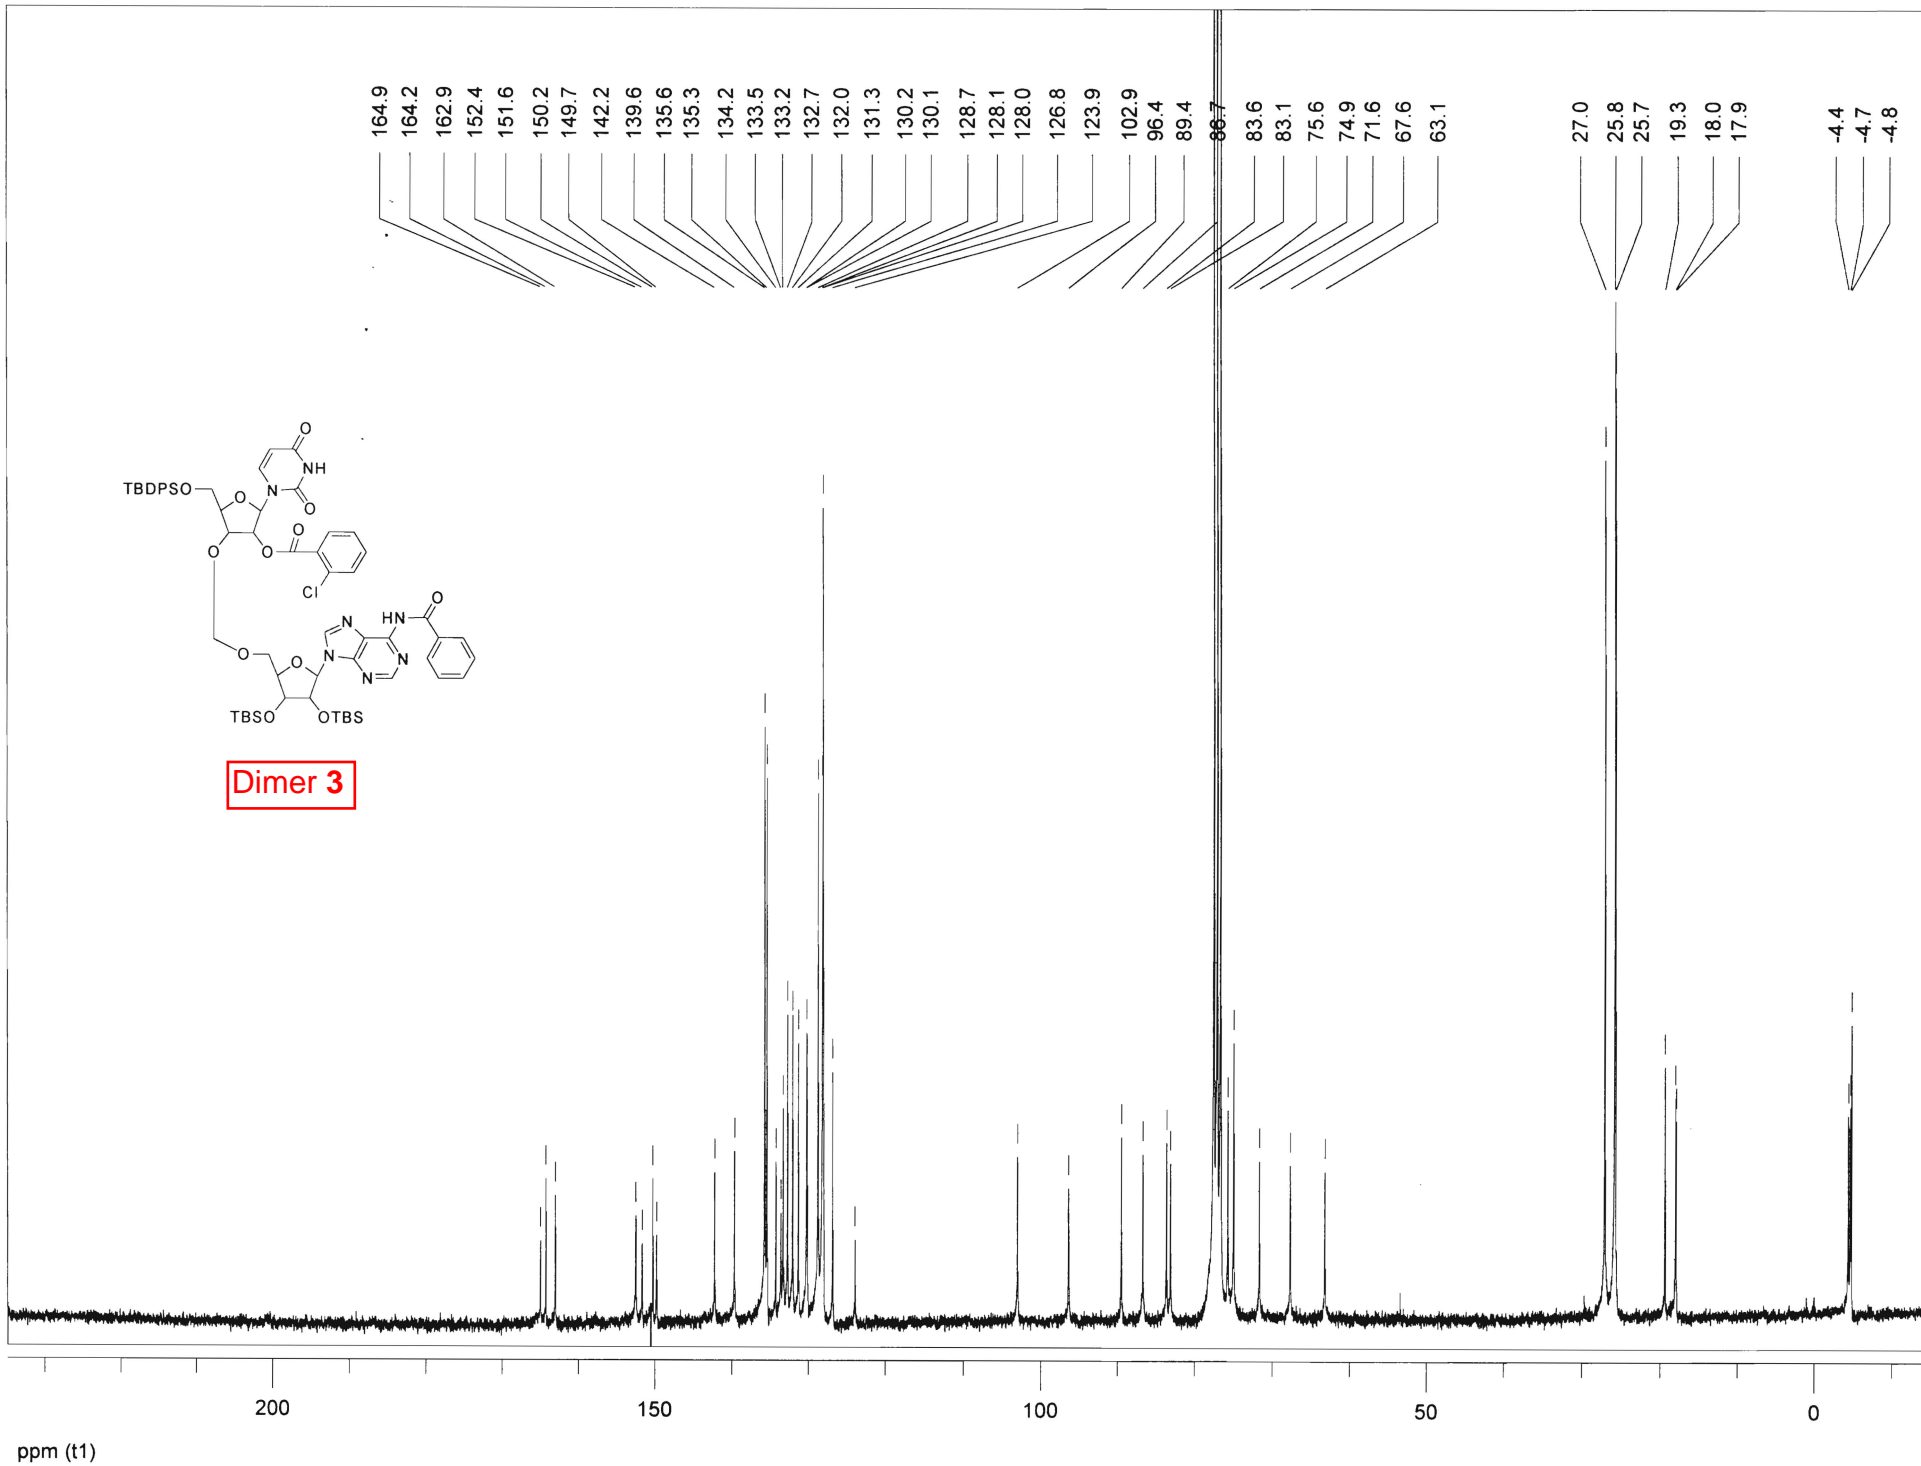

Dimer 3



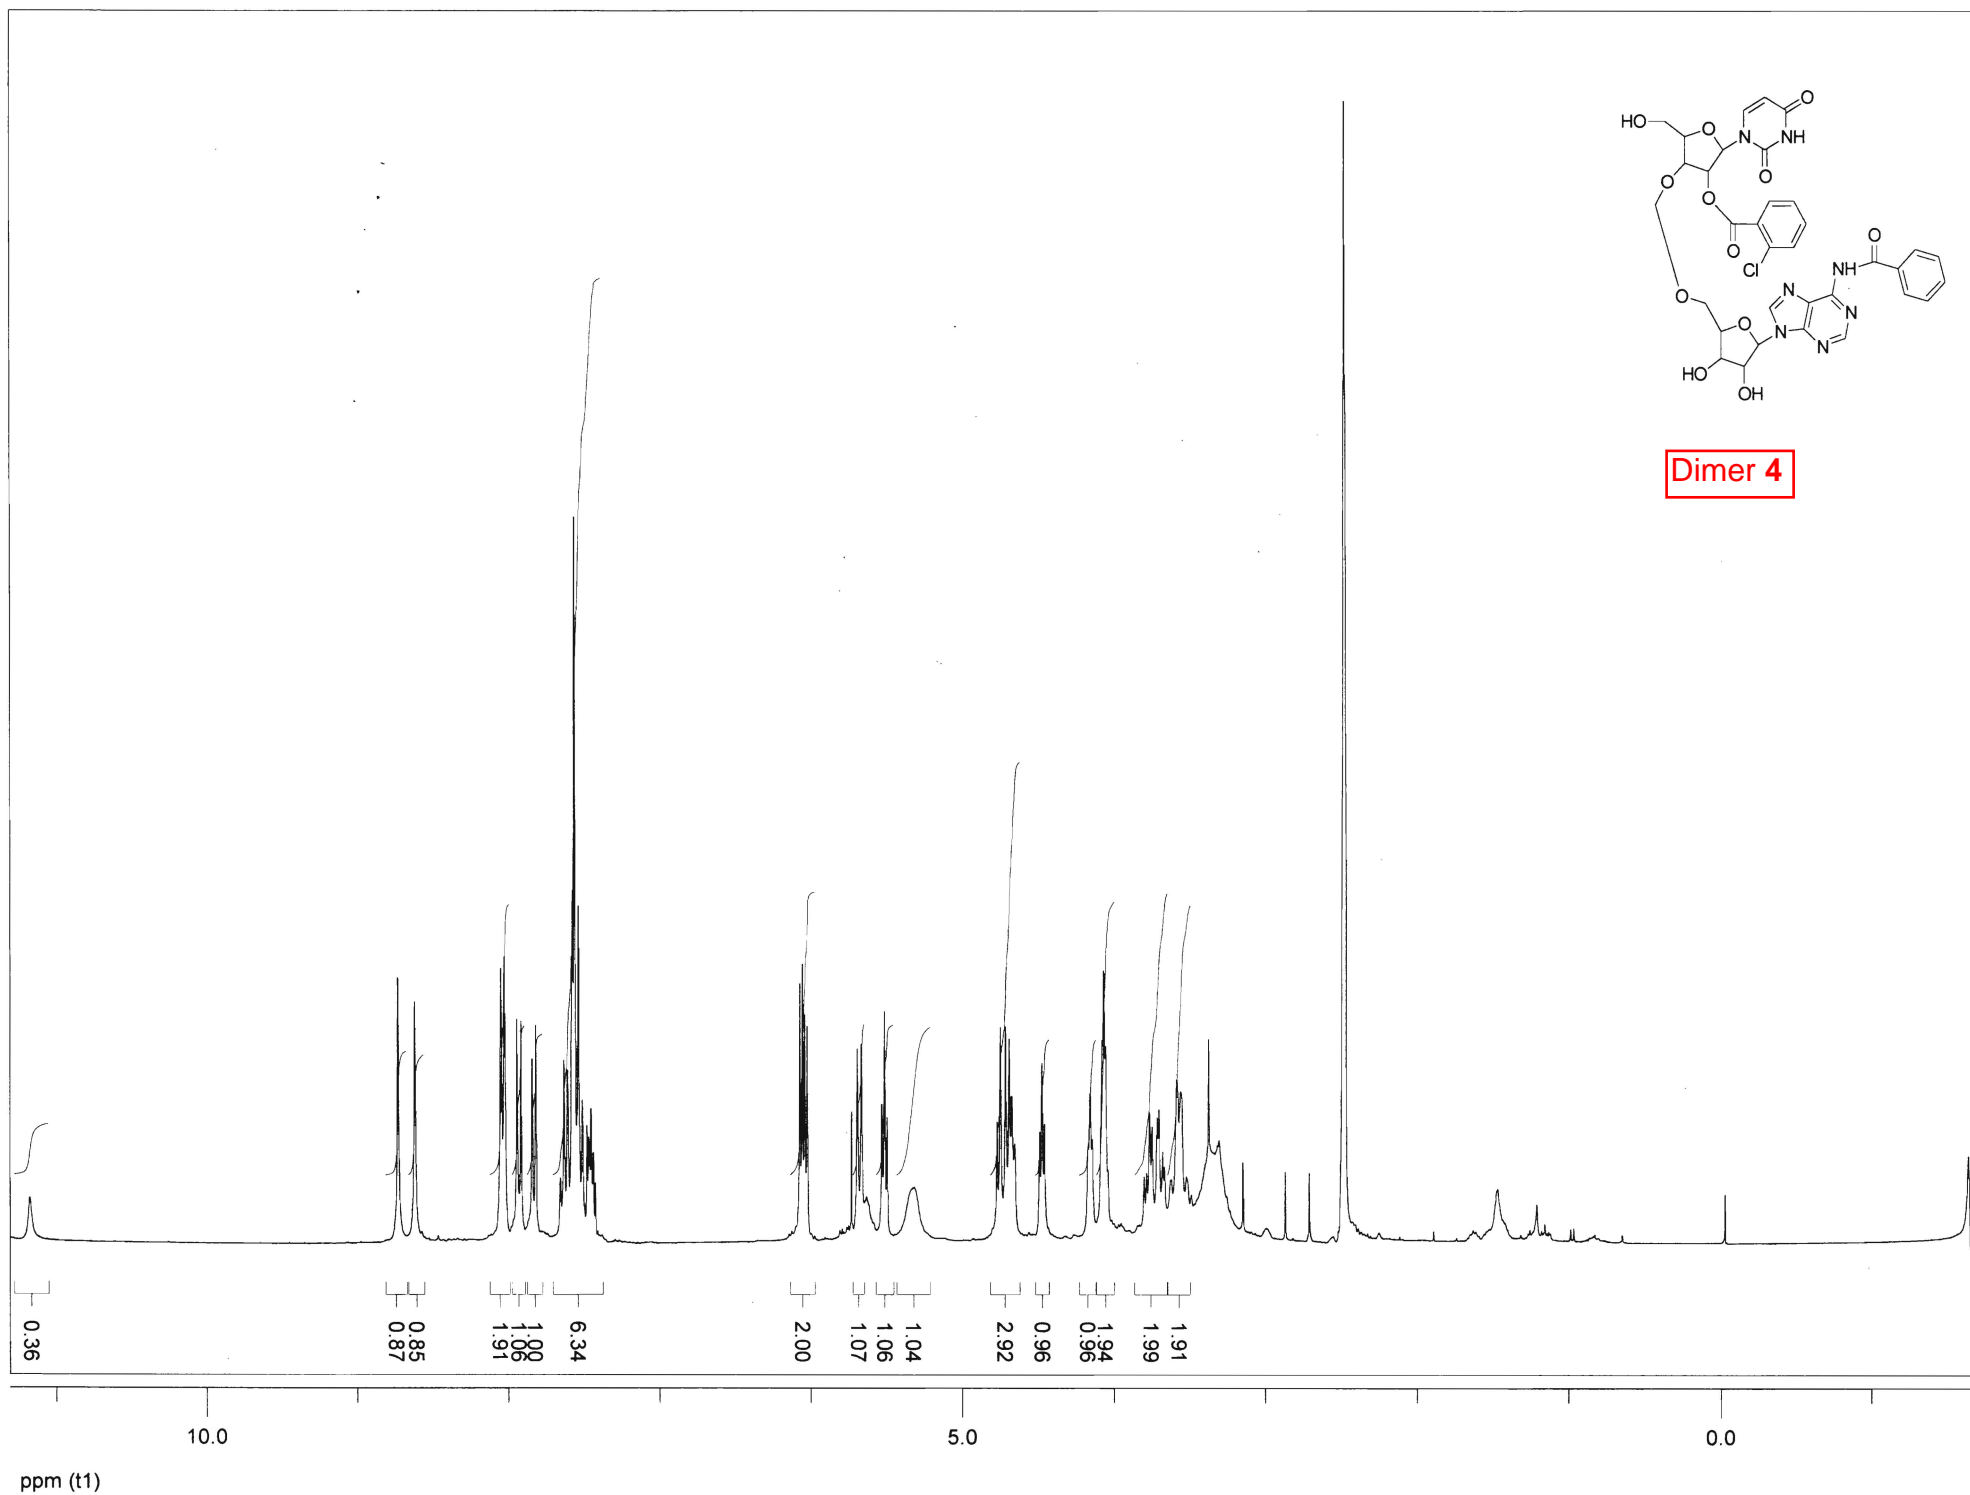

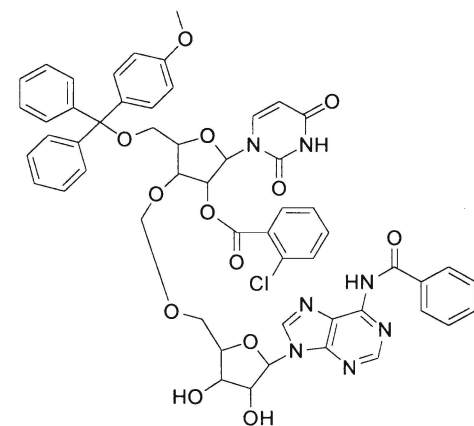

Dimer 5

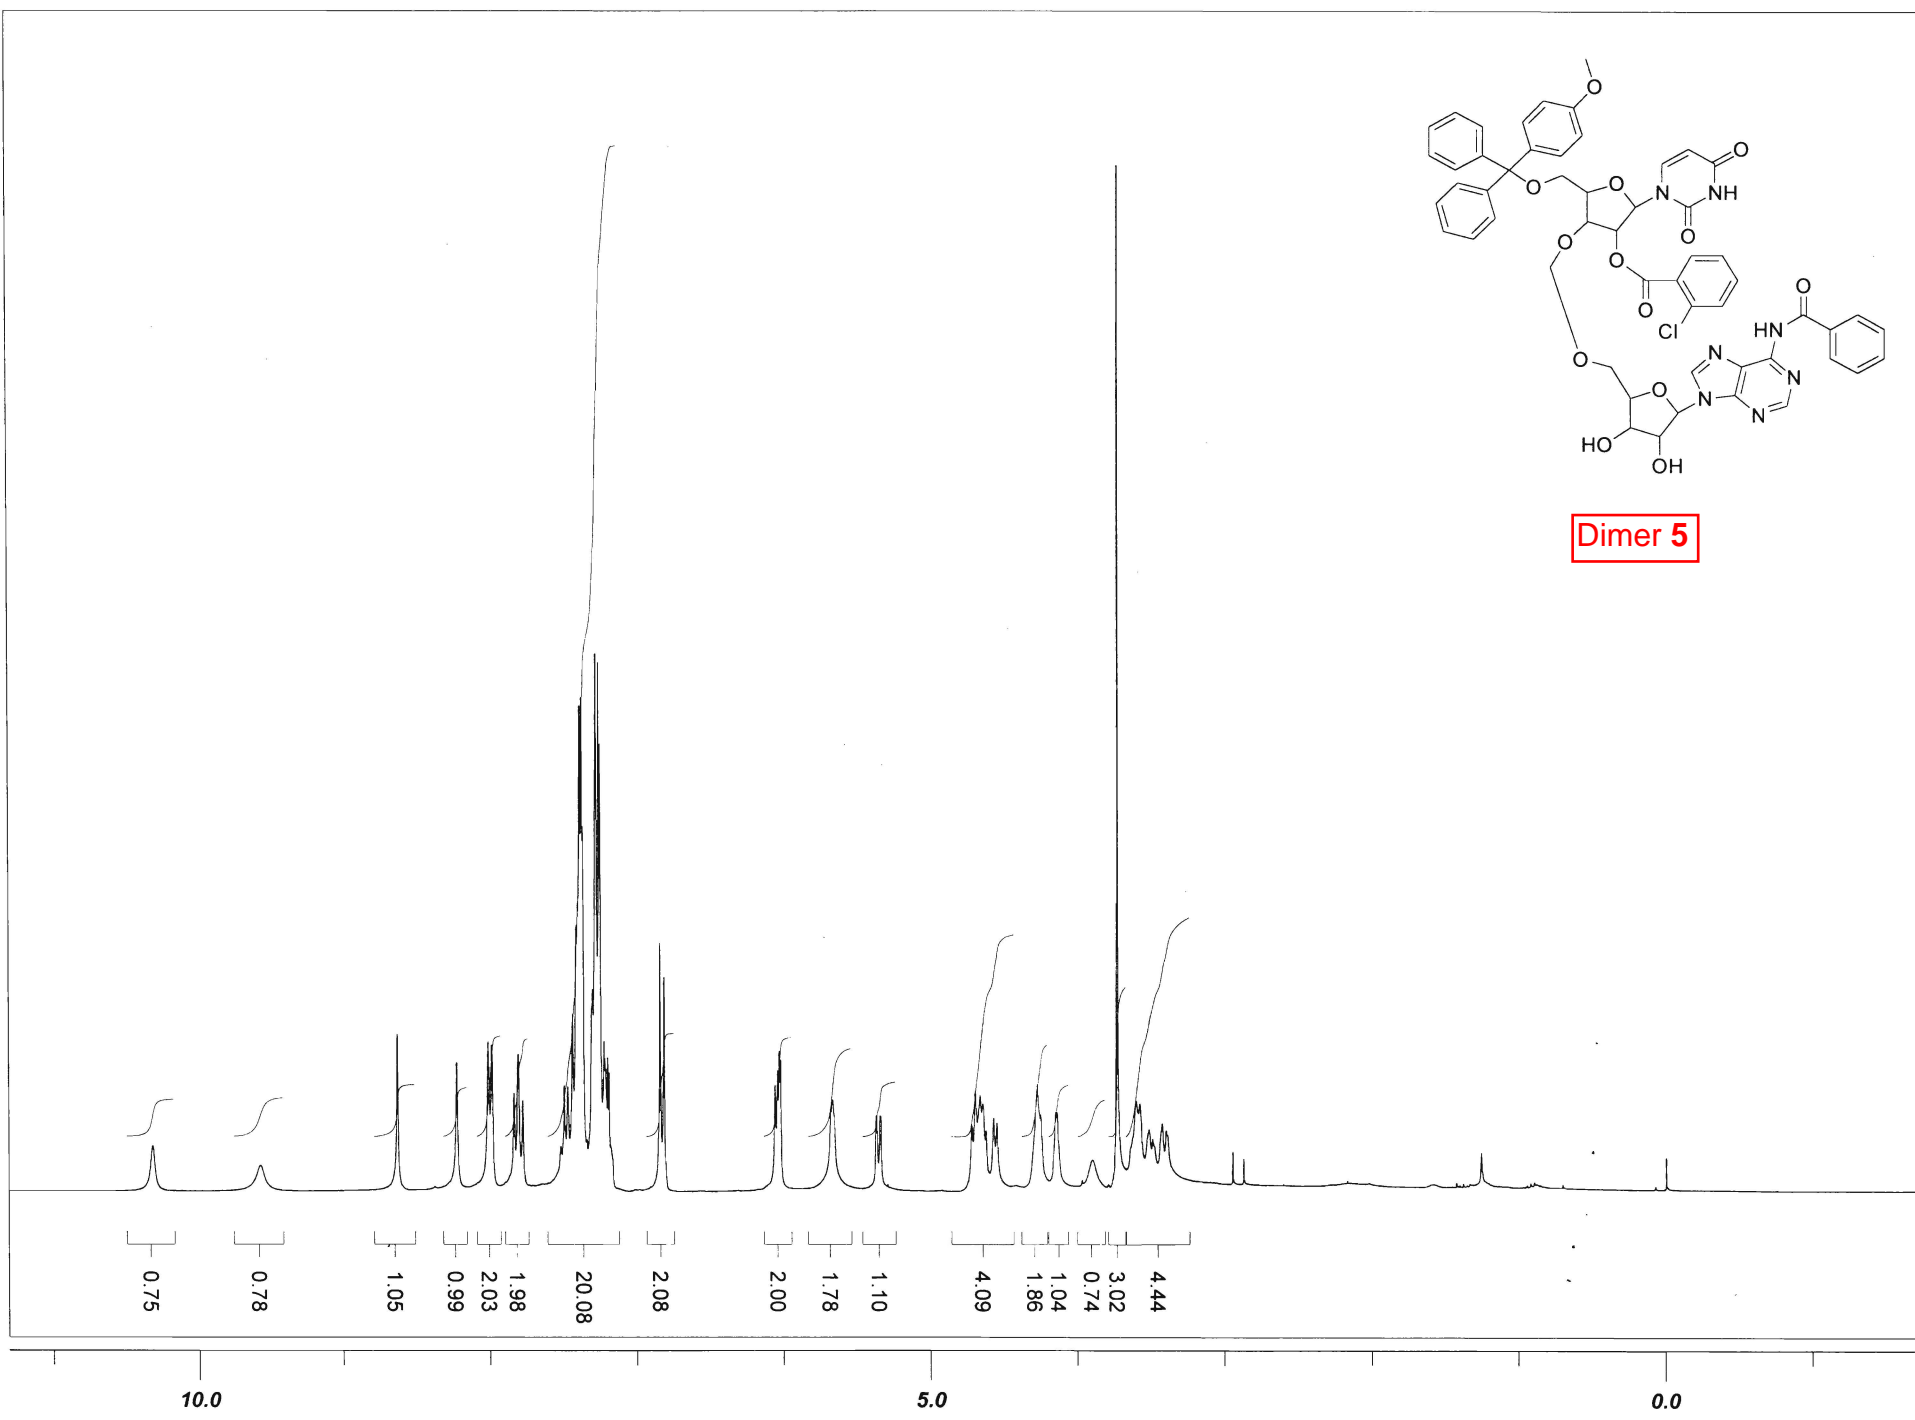

ppm (t1)

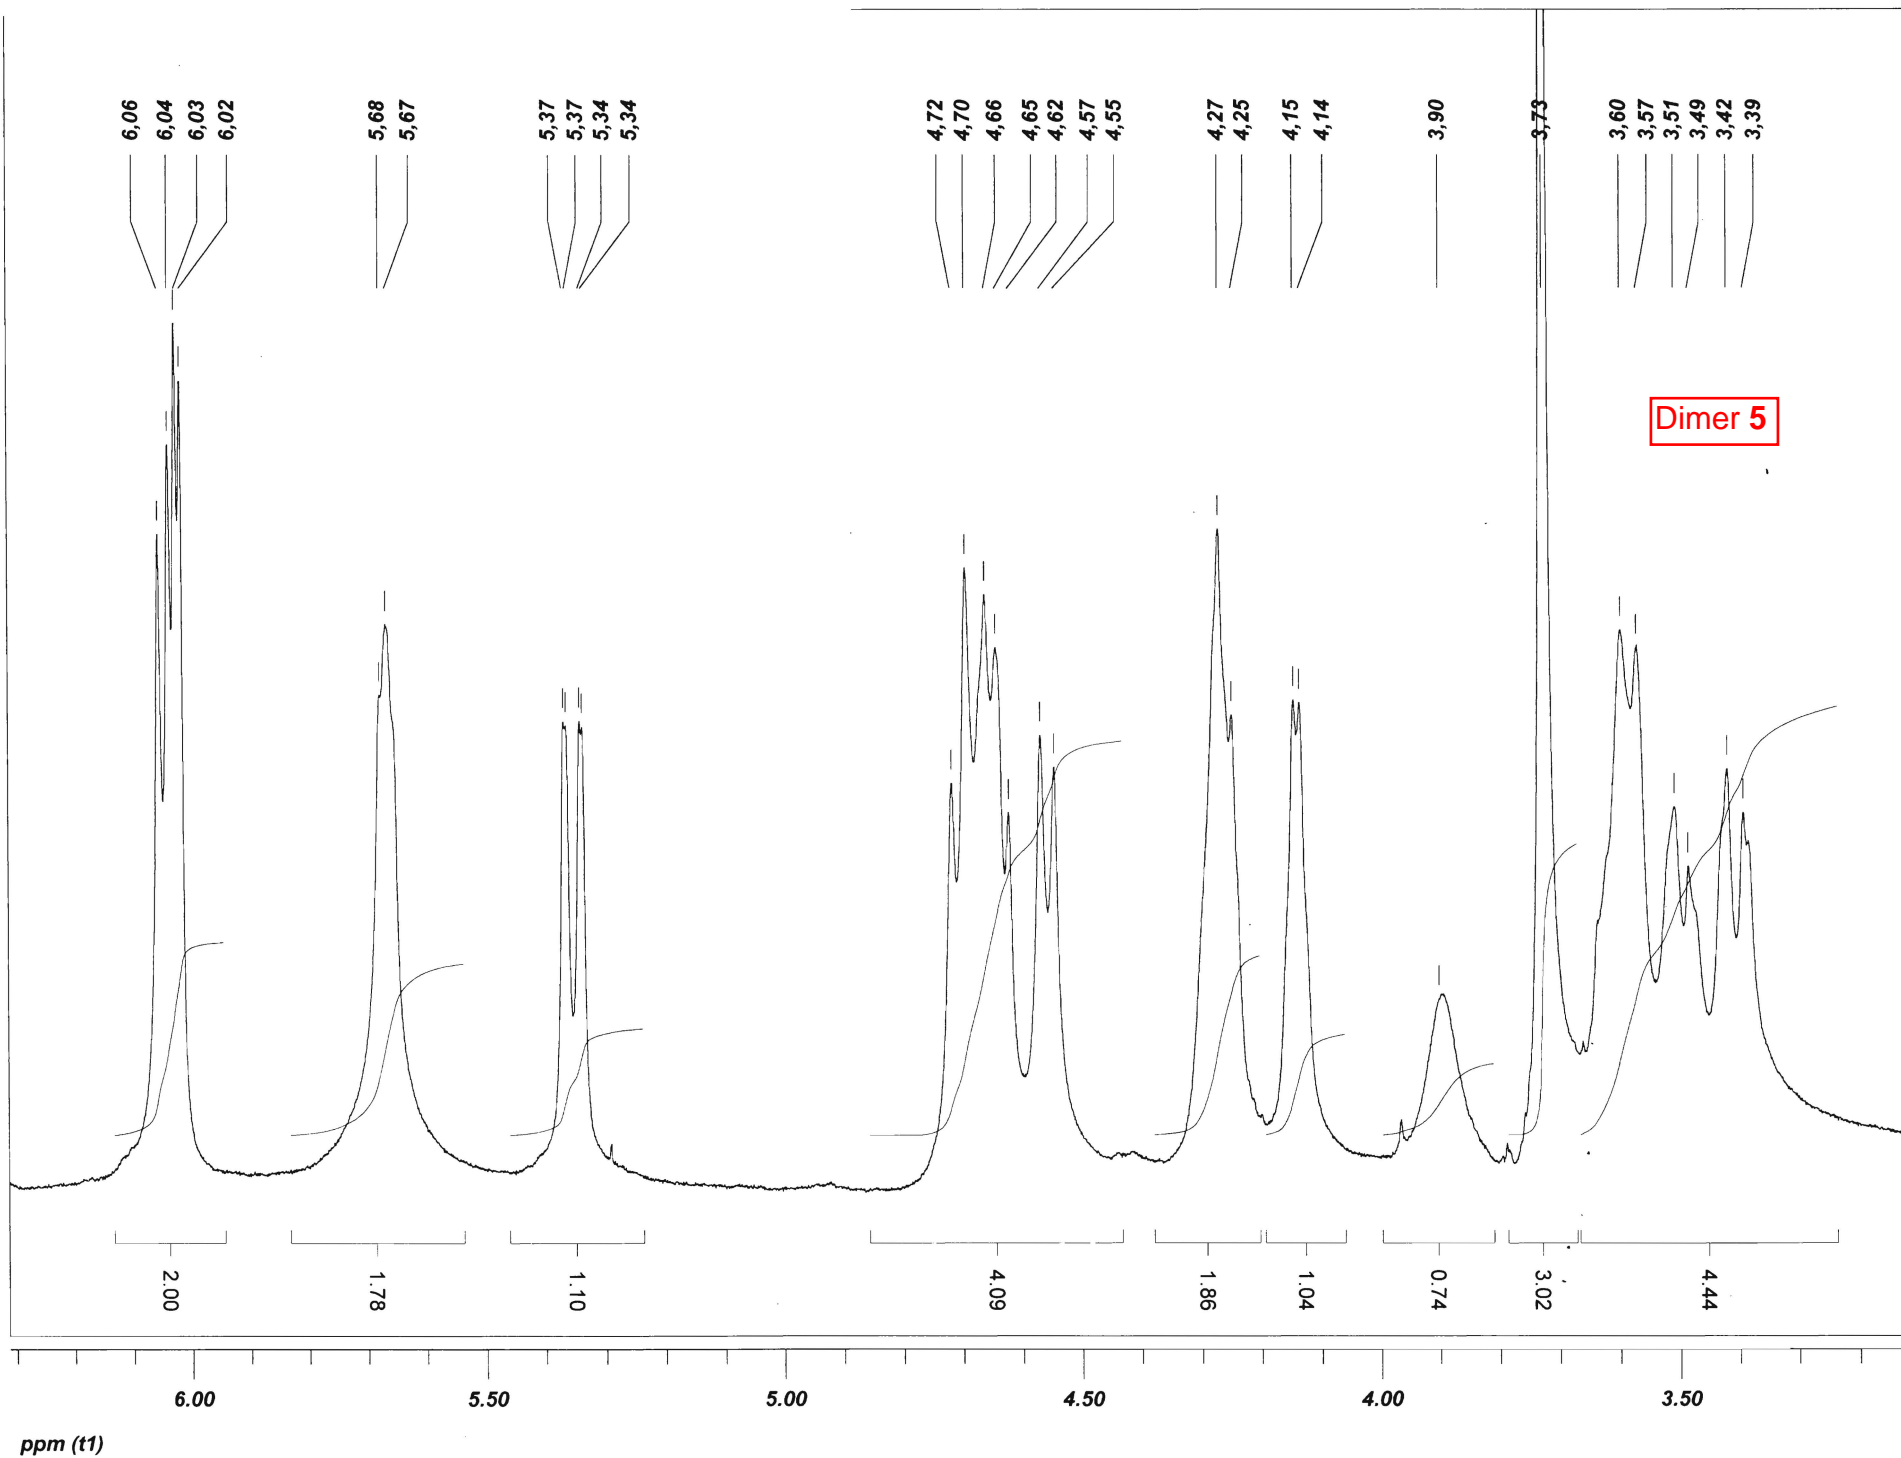

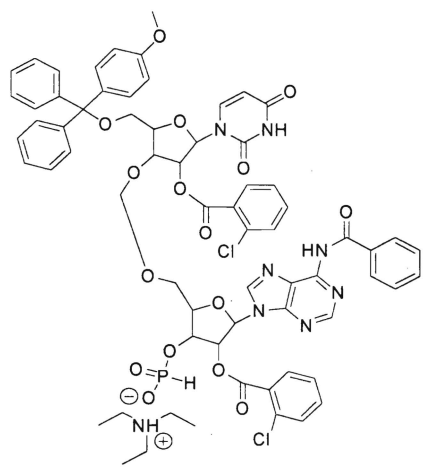

Dimer 6

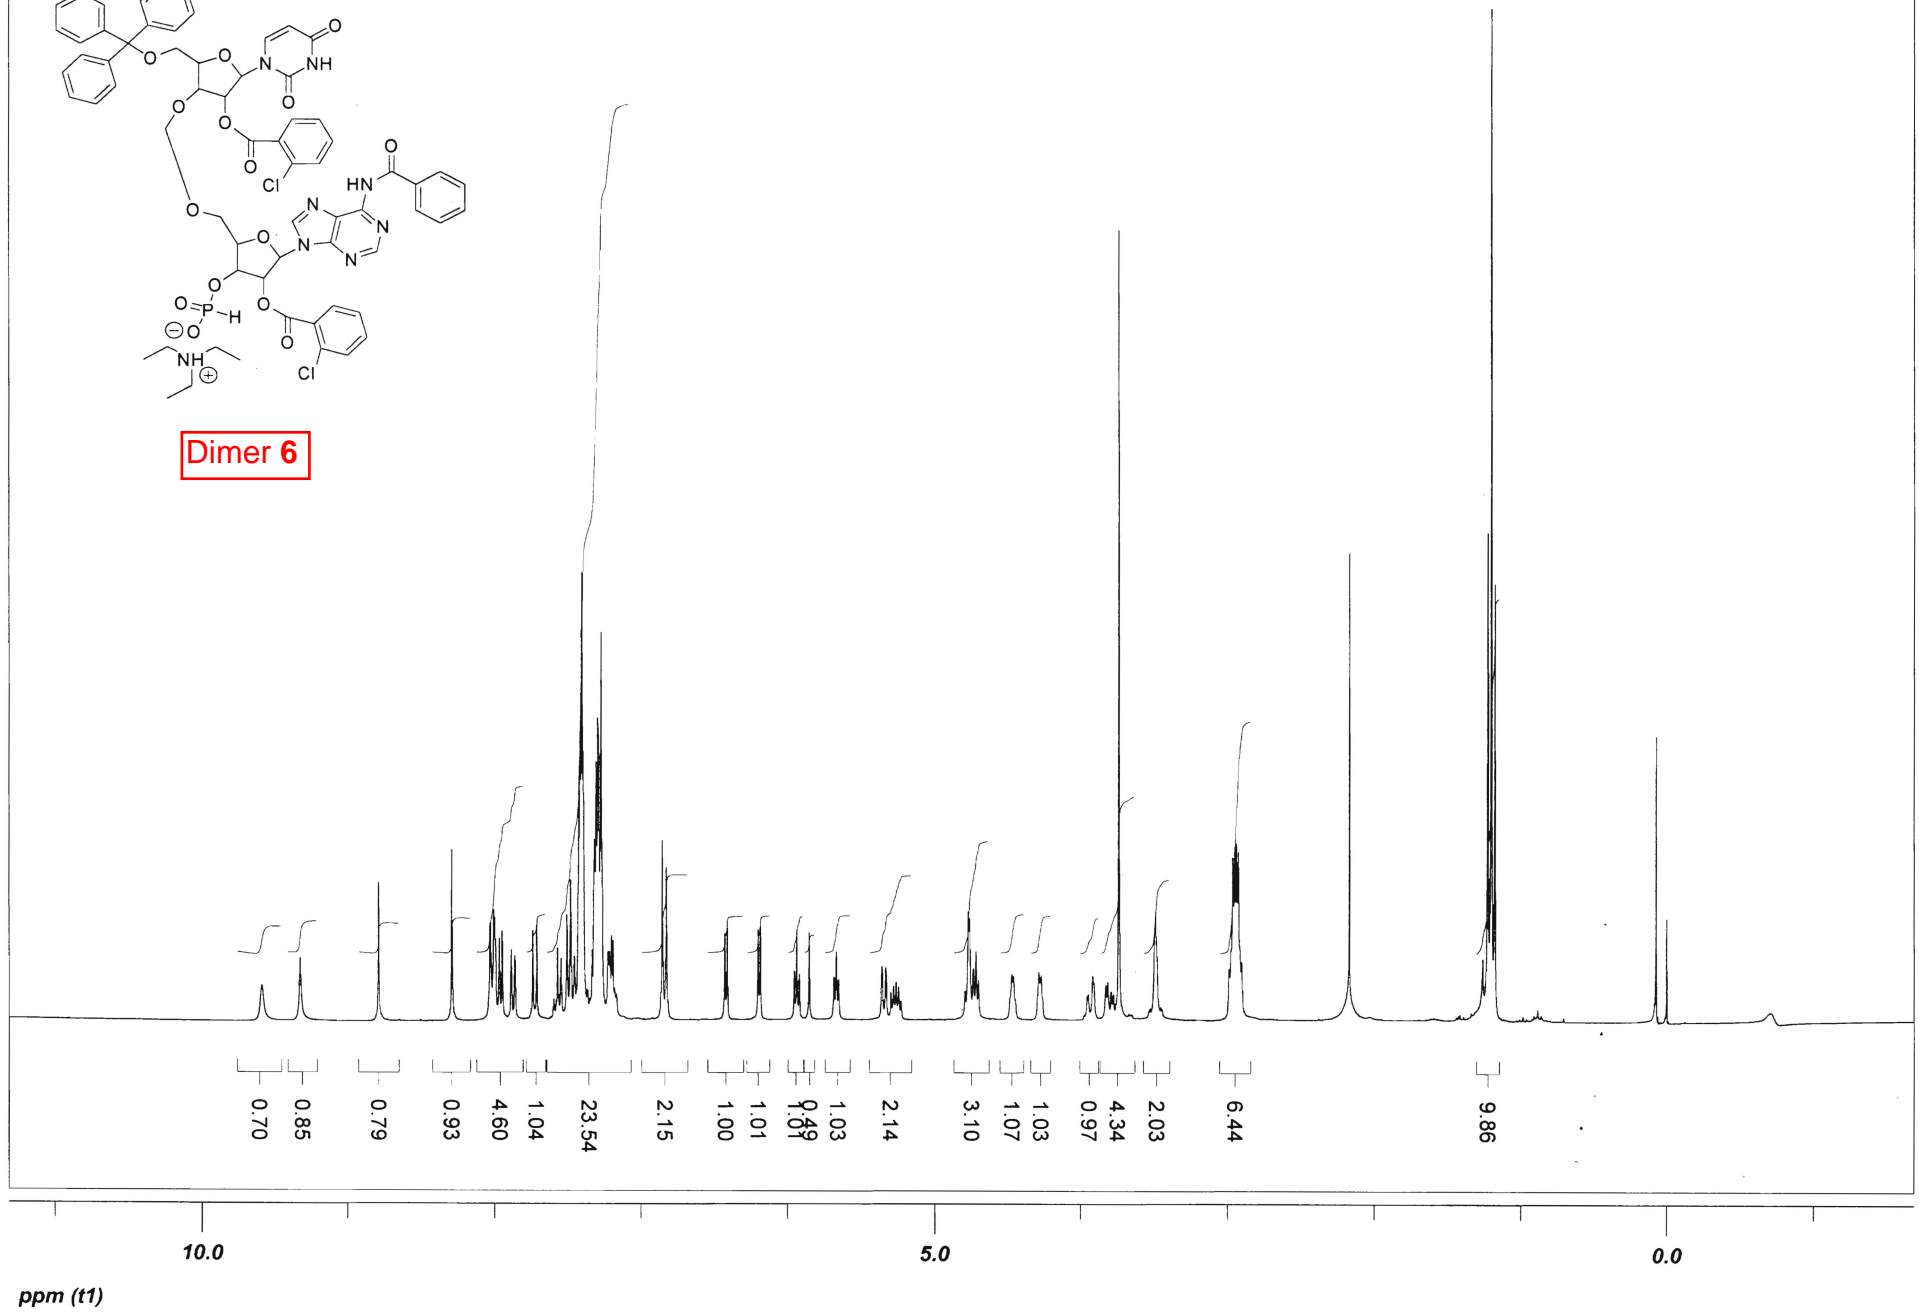

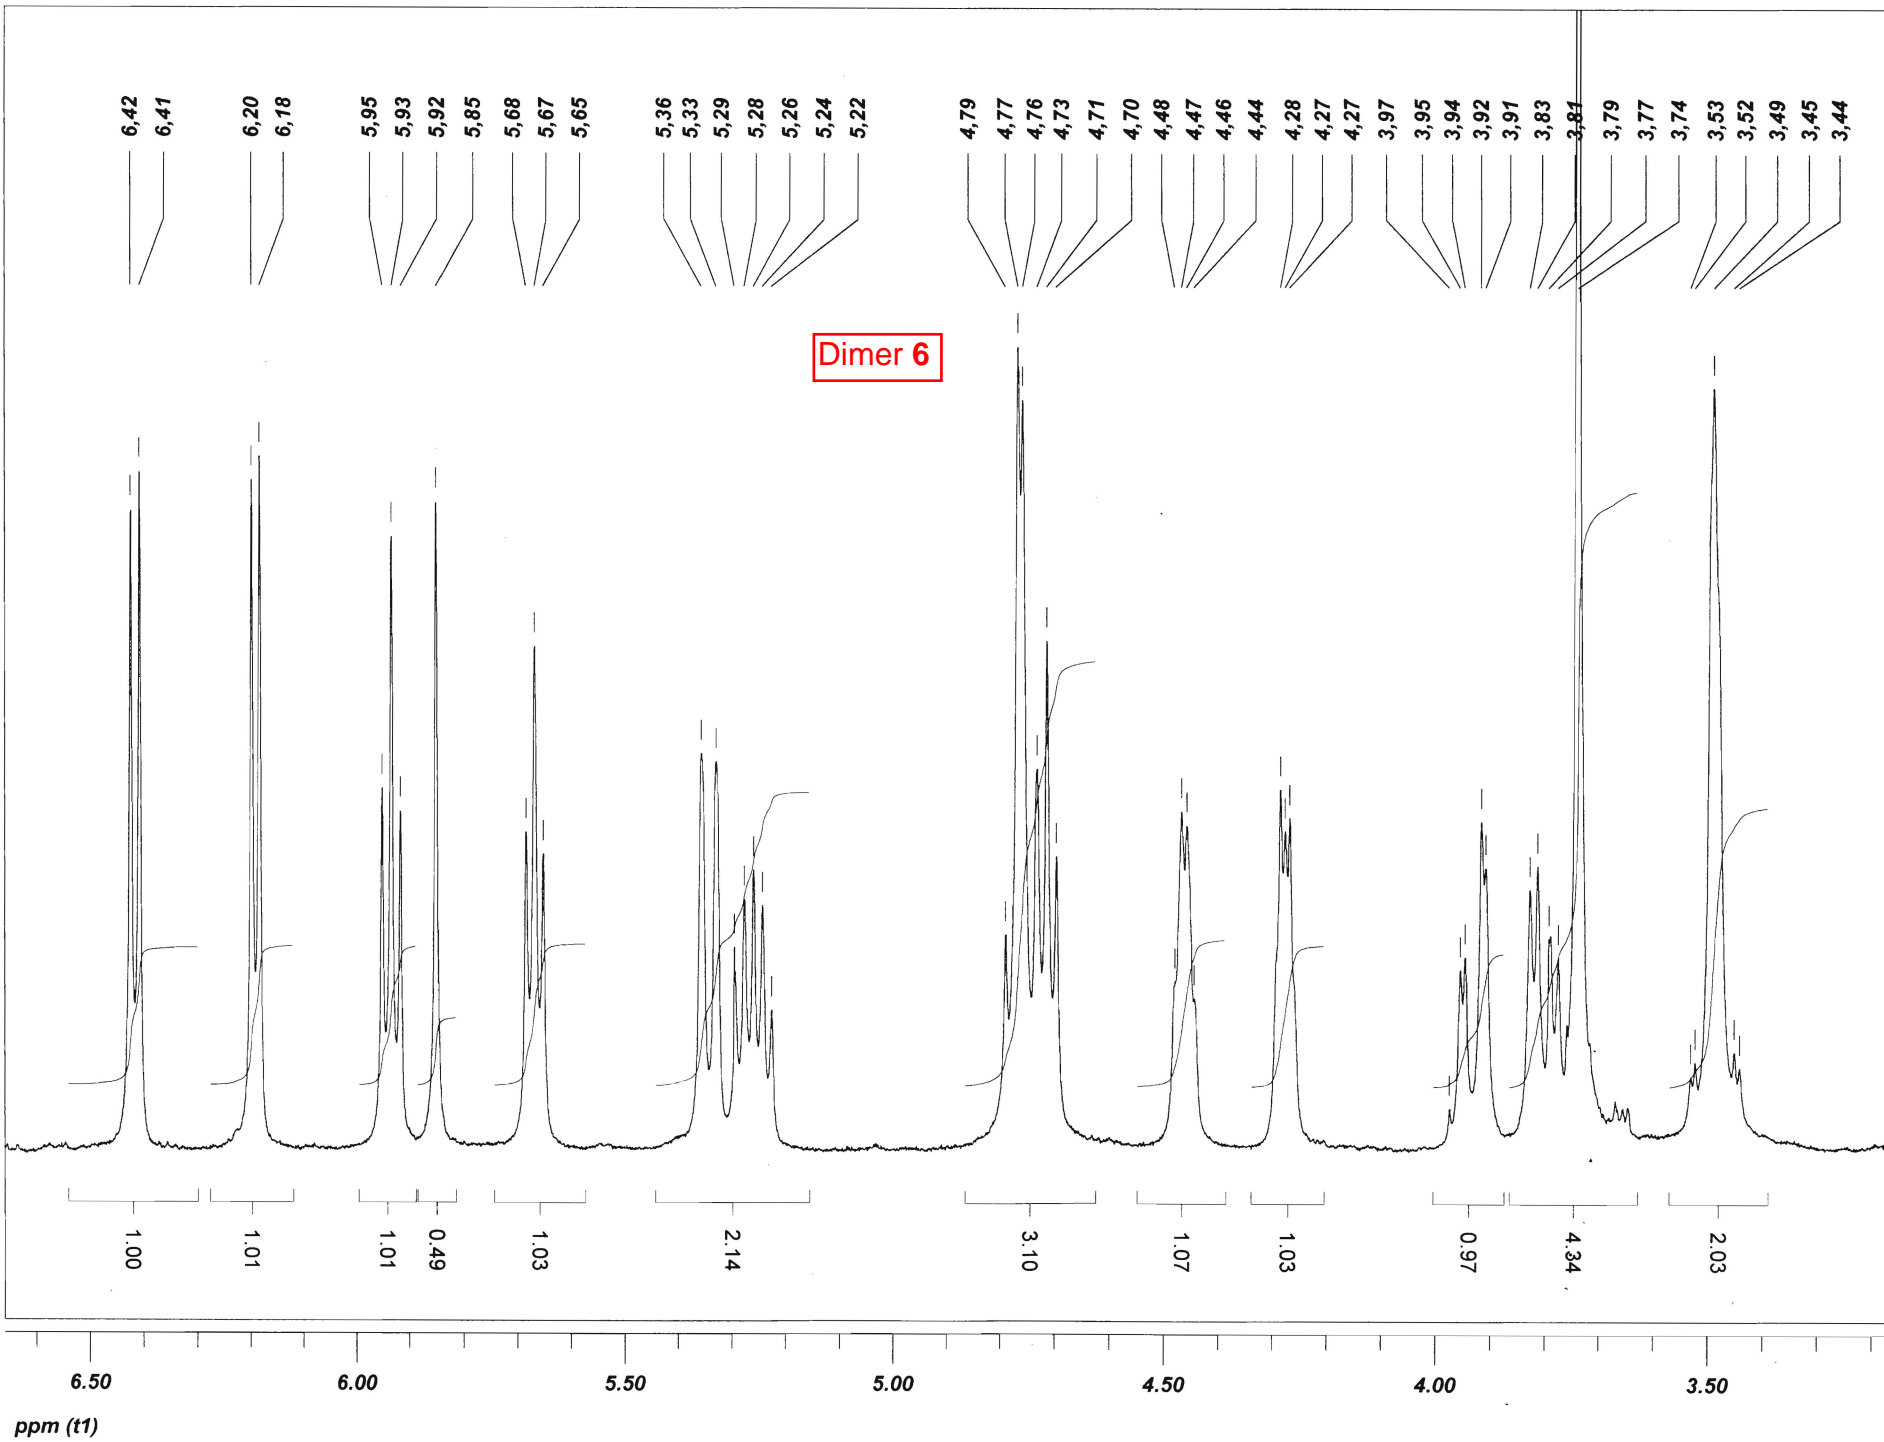

TBDPSO dT 3'-OCH2OSMe

Pulse Sequence: s2pu1

Solvent: CDC13

Ambient temperature

Mercury-300 "nmr300"

PULSE SEQUENCE

Relax. delay 1.000 sec

Pulse 64.3 degrees

Acq. time 1.994 sec

Width 3898.6 Hz

64 repetitions

OBSERVE H1, 299.9504945 MHz

DATA PROCESSING

FT size 16384

Total time 3 min, 18 sec

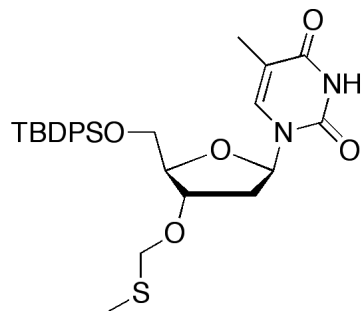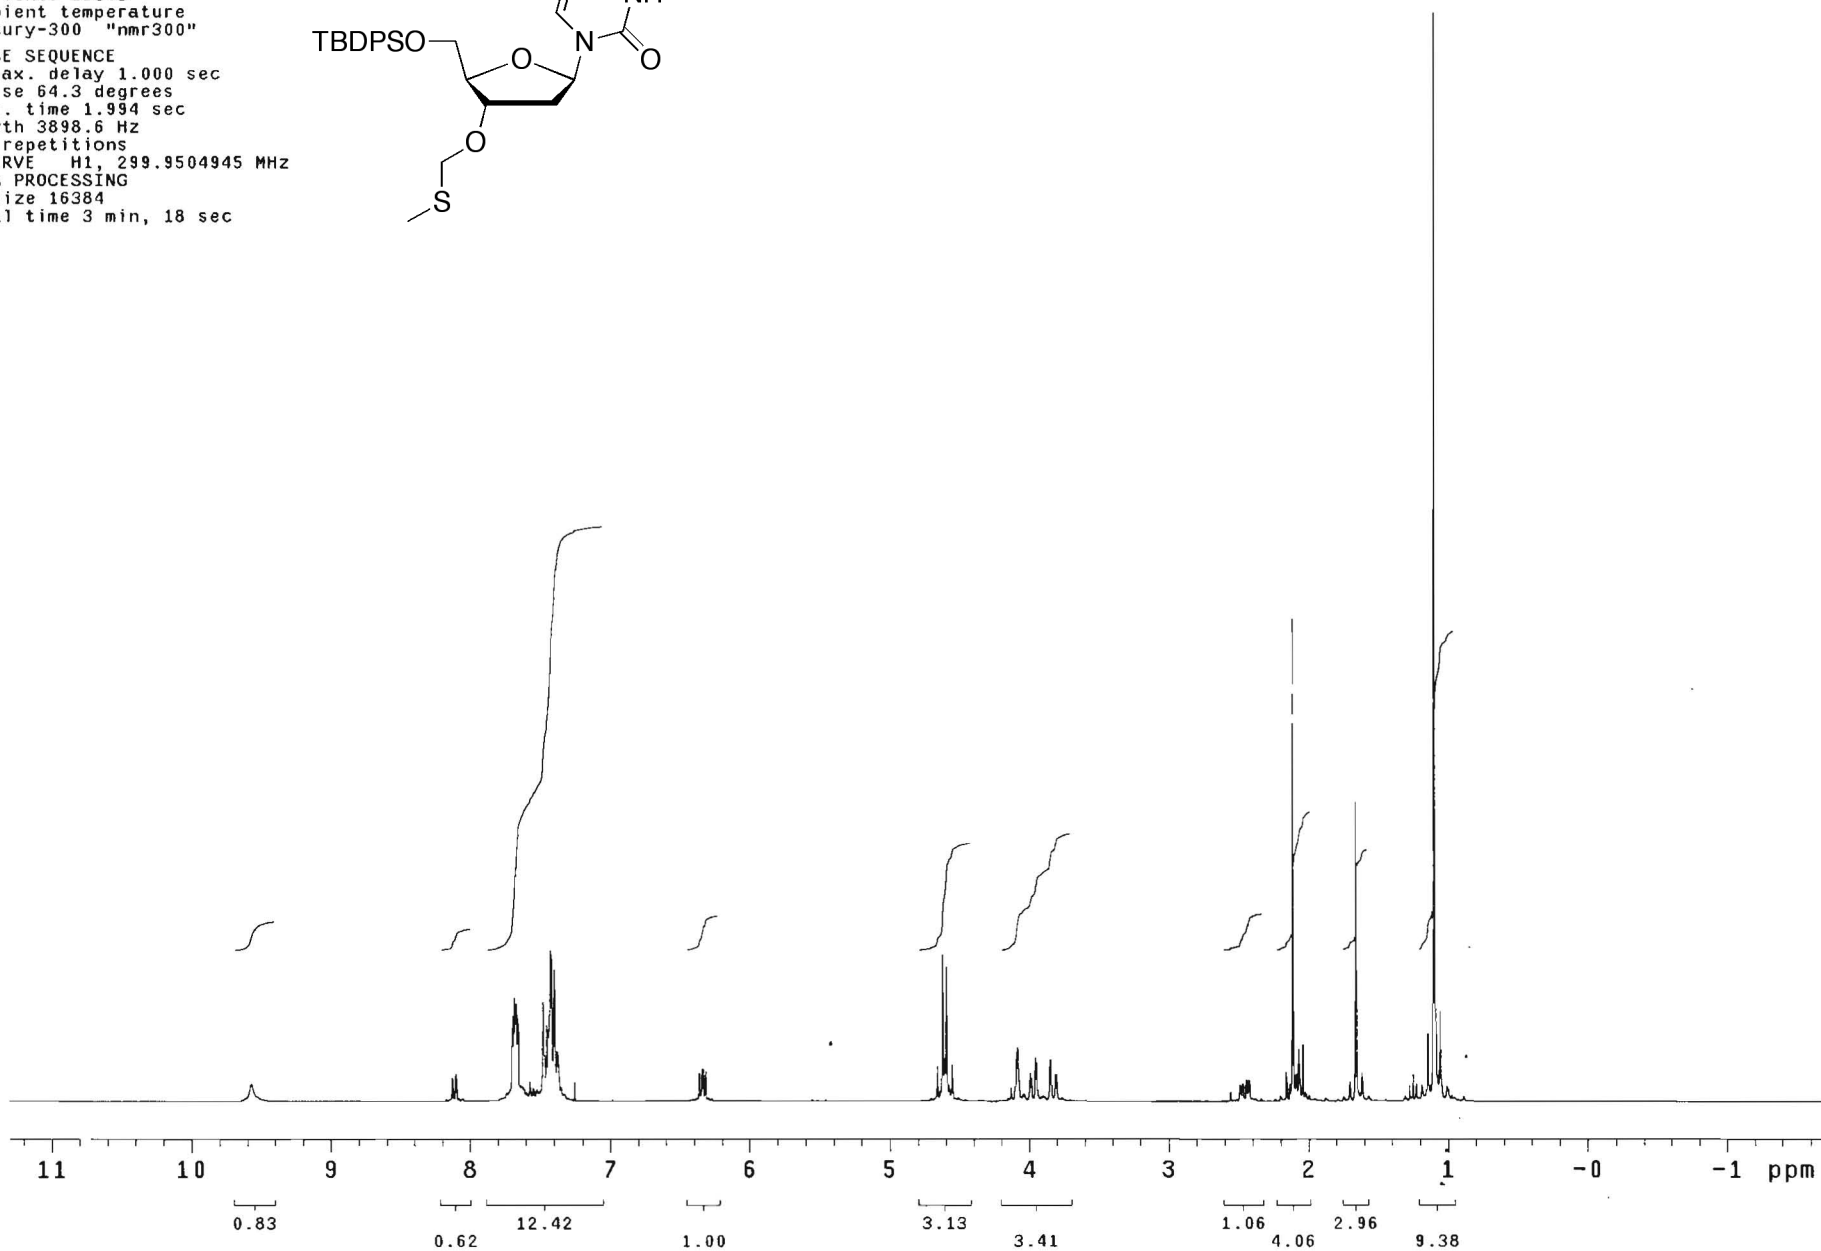

TBDPS dT 3'-OCH2SMe

Pulse Sequence: s2pu1

Solvent: CDCl3  
Ambient temperature  
Mercury-300 "nmr300"

PULSE SEQUENCE  
Relax. delay 1.000 sec  
Pulse 64.3 degrees  
Acq. time 1.994 sec  
Width 3898.6 Hz  
64 repetitions  
OBSERVE H1, 299.9504945 MHz  
DATA PROCESSING  
FT size 16384  
Total time 3 min, 18 sec

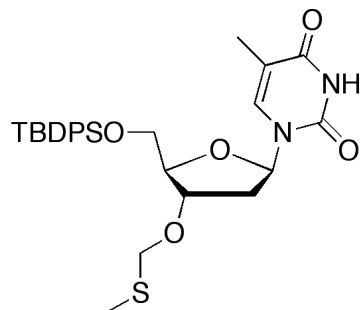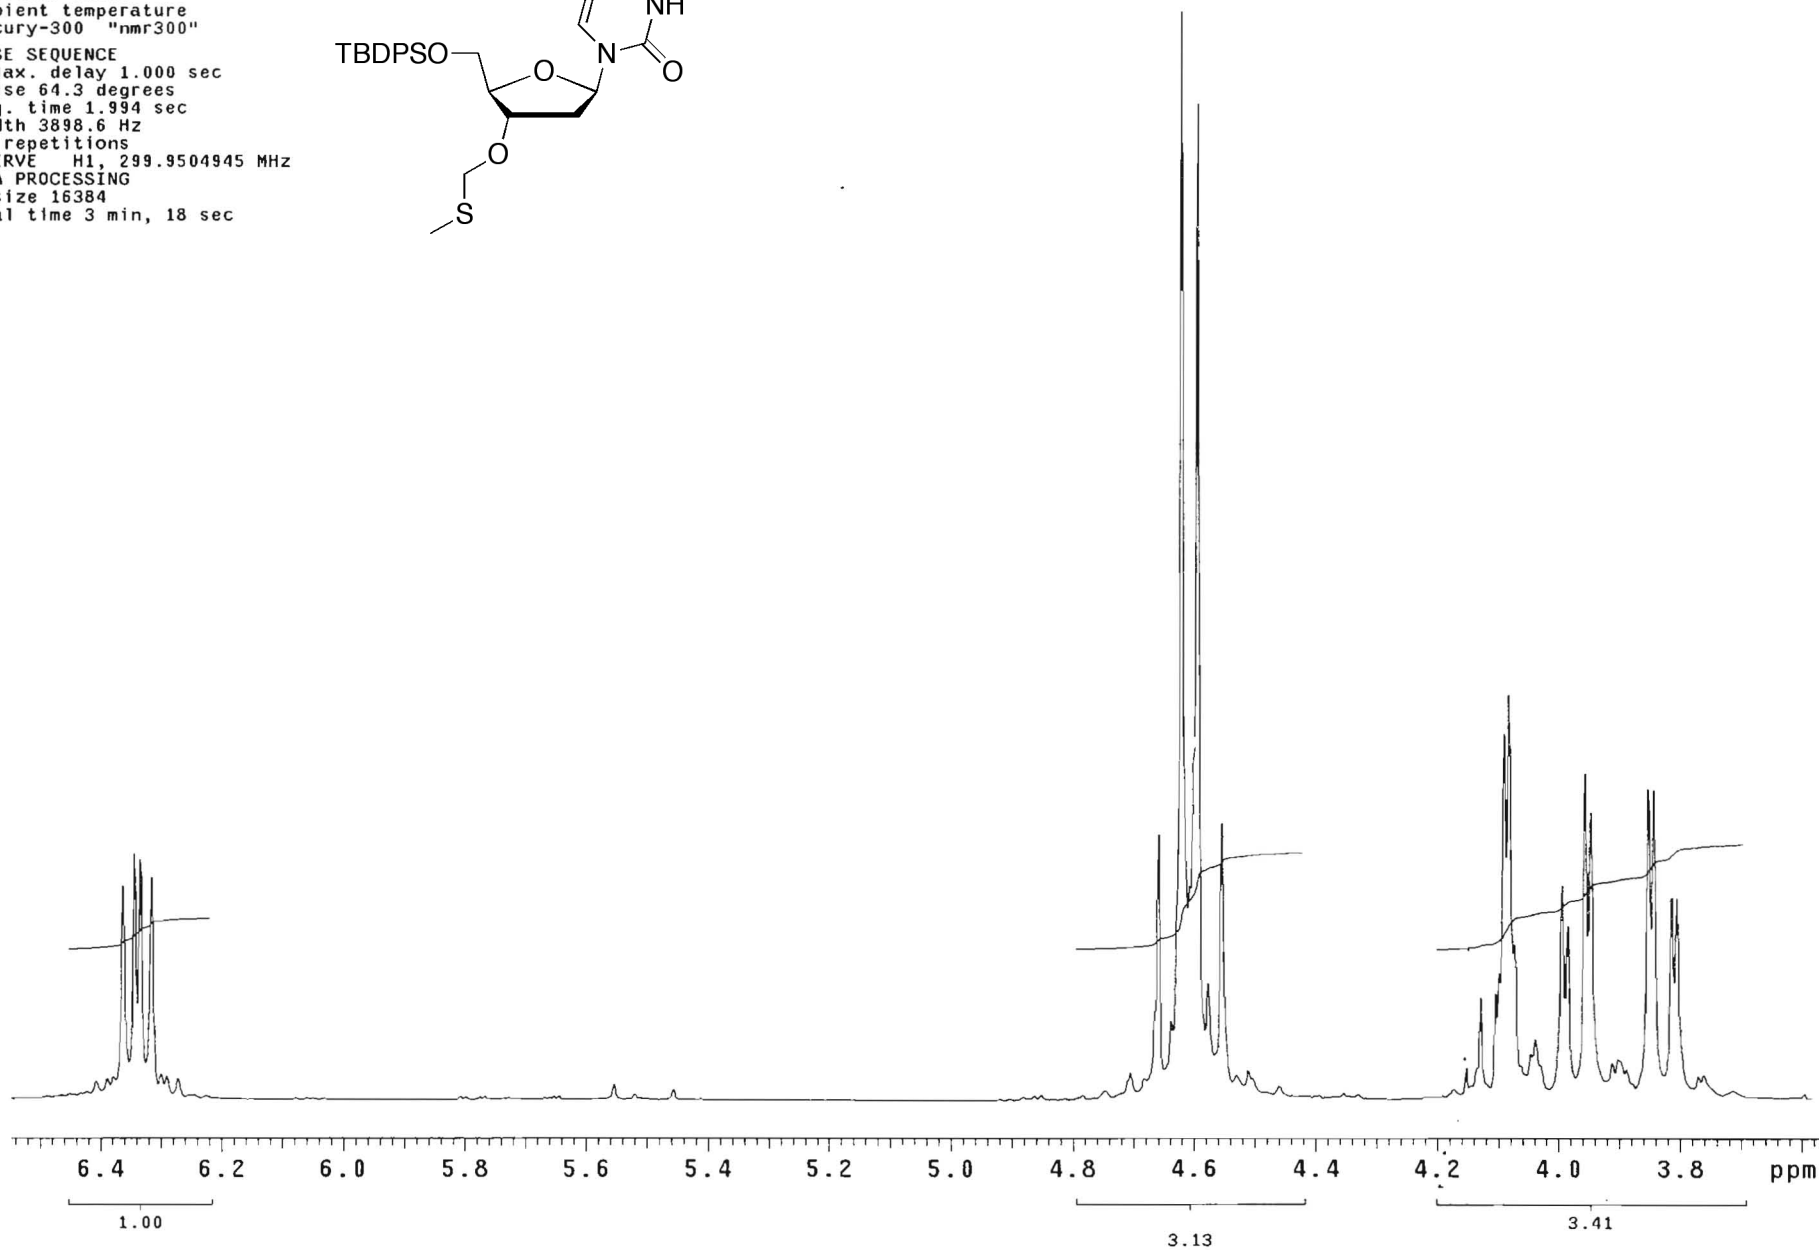

TBDPSO dT 3'-OCH2-SMe

Pulse Sequence: s2pu1

Solvent: CDCl3

Ambient temperature

Mercury-300 "nmr300"

PULSE SEQUENCE

Relax. delay 1.000 sec

Pulse 56.6 degrees

Acq. time 1.738 sec

Width 18867.9 Hz

1456 repetitions

OBSERVE C13, 75.4225938 MHz

DECOUPLE H1, 299.9519364 MHz

Power 39 dB

continuously on

WALTZ-16 modulated

DATA PROCESSING

Line broadening 2.0 Hz

FT size 131072

Total time 84 hr, 3 min, 29 sec

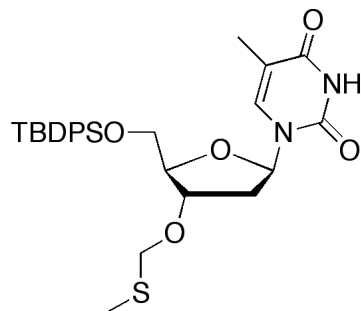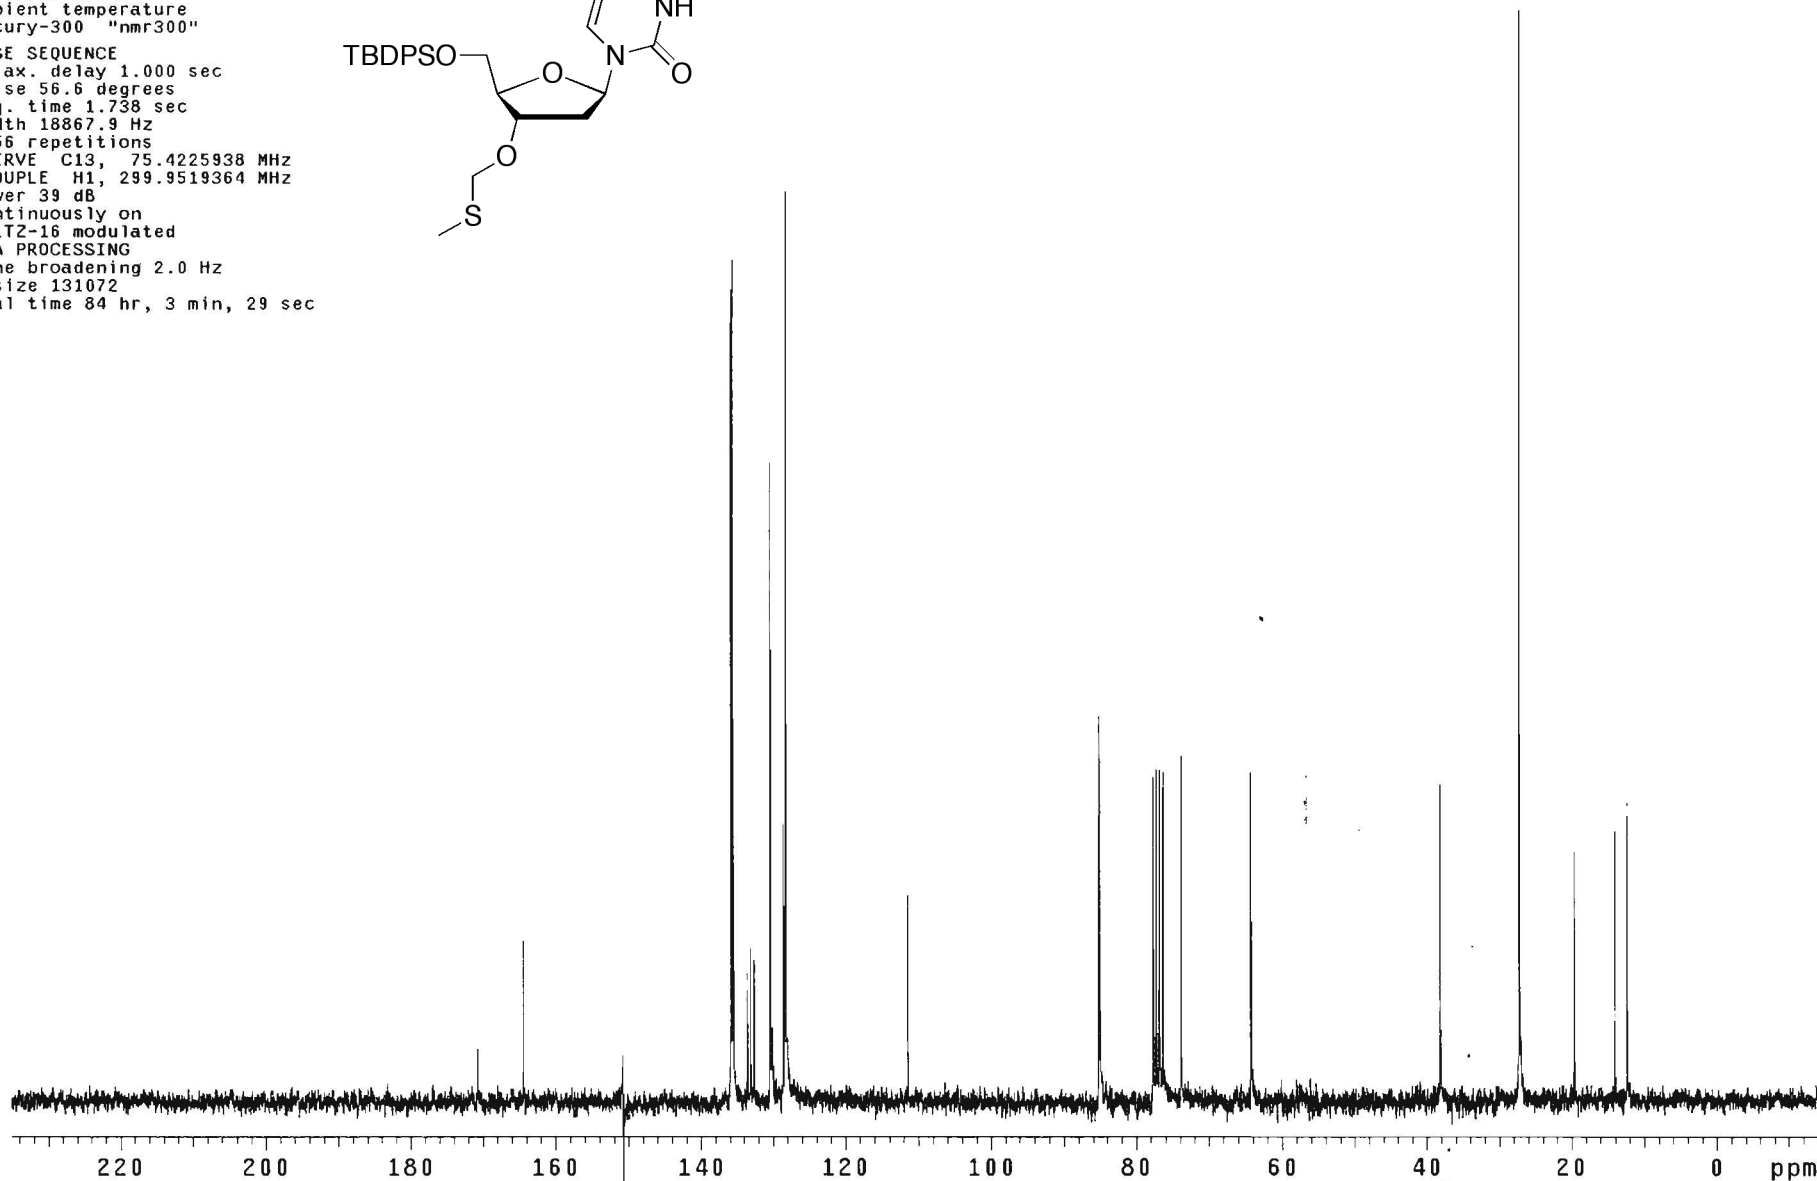



STANDARD 1H OBSERVE

Pulse Sequence: s2pu1

Solvent: CDCl3  
Ambient temperature  
Mercury-300 "nmr300"

PULSE SEQUENCE

Relax. delay 1.000 sec  
Pulse 64.3 degrees  
Acq. time 1.994 sec  
Width 3898.6 Hz  
32 repetitions

OBSERVE H1, 299.9504945 MHz

DATA PROCESSING

FT size 16384

Total time 1 min, 39 sec

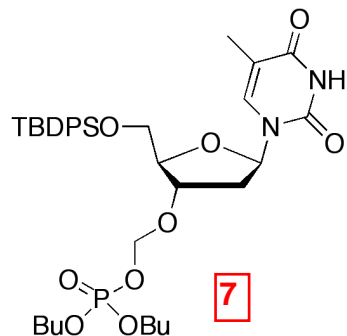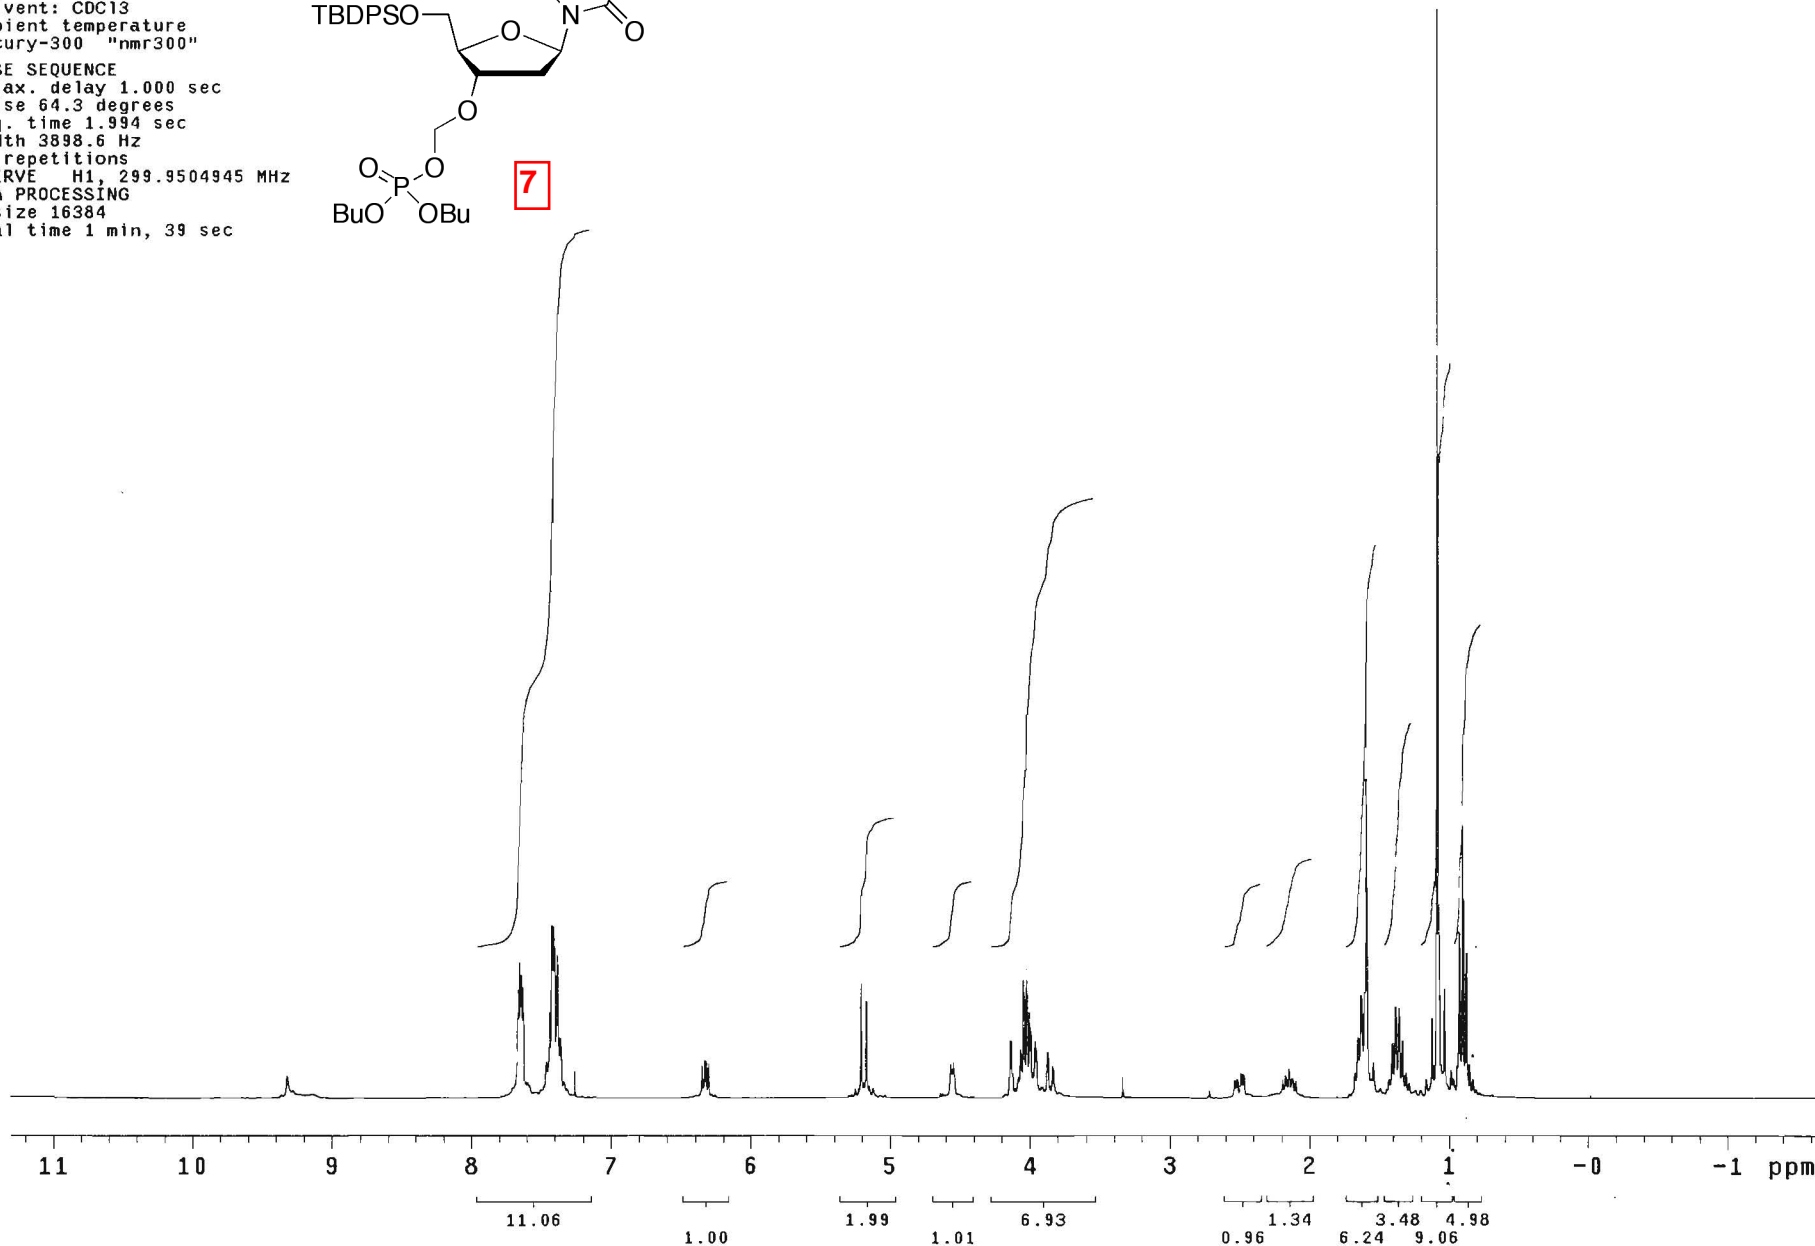

STANDARD 1H OBSERVE

Pulse Sequence: s2pu1

Solvent: CDCl3  
Ambient temperature  
Mercury-300 "nmr300"

PULSE SEQUENCE

Relax. delay 1.000 sec  
Pulse 64.3 degrees  
Acq. time 1.994 sec  
Width 3898.6 Hz  
32 repetitions

OBSERVE H1, 299.9504945 MHz

DATA PROCESSING

FT size 16384

Total time 1 min, 39 sec

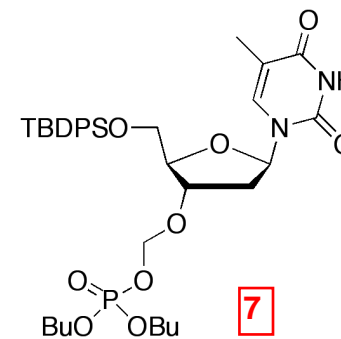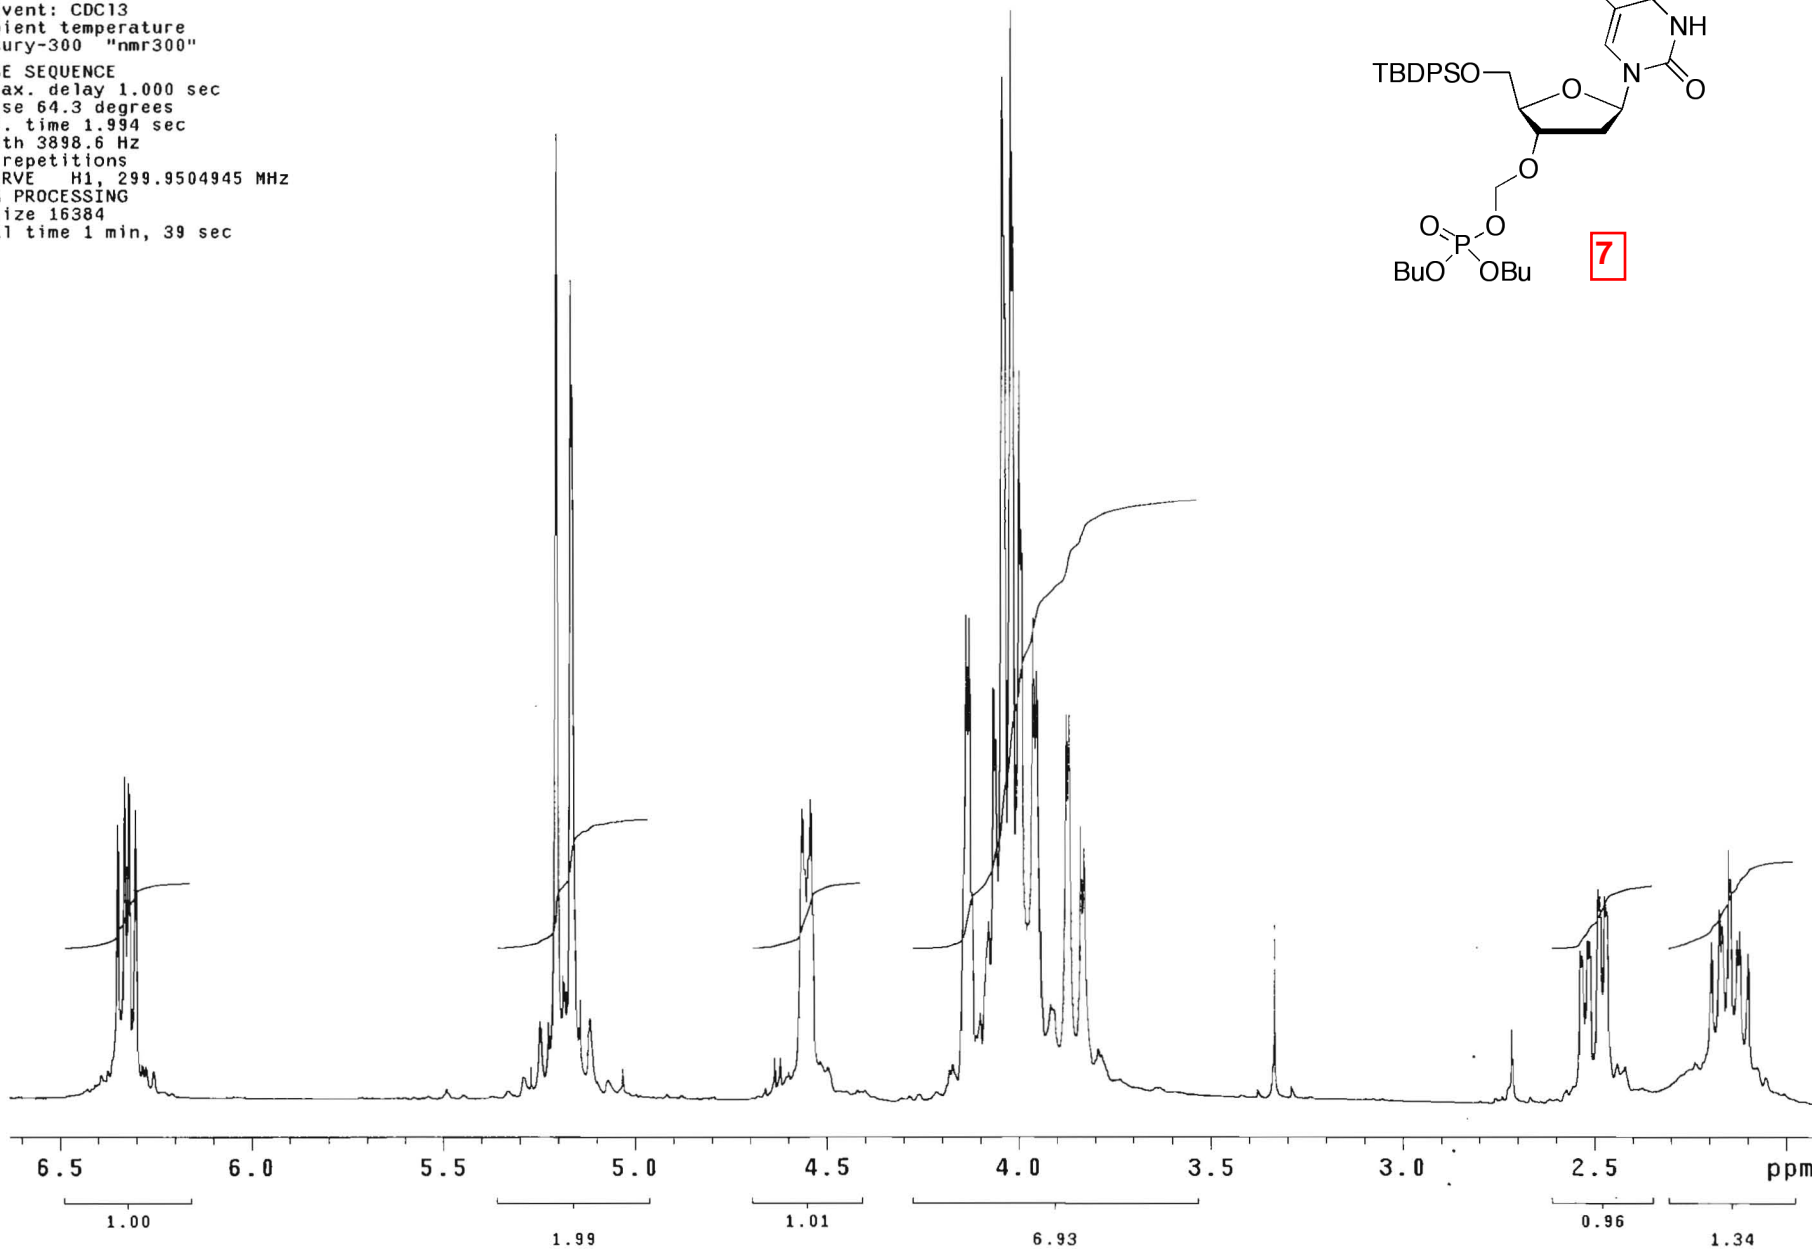

Pulse Sequence: s2pu1

Solvent: CDC13  
Ambient temperature  
Mercury-300 "nmr300"

PULSE SEQUENCE

Relax. delay 1.000 sec

Pulse 56.6 degrees

Acq. time 1.738 sec

Width 18867.9 Hz

656 repetitions

OBSERVE C13, 75.4225938 MHz

DECOUPLE H1, 299.9519364 MHz

Power 39 dB

continuously on

WALTZ-16 modulated

DATA PROCESSING

Line broadening 1.0 Hz

FT size 131072

Total time 8 hr, 25 min, 10 sec

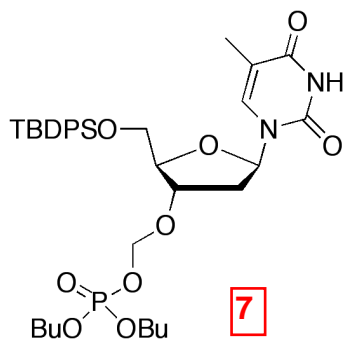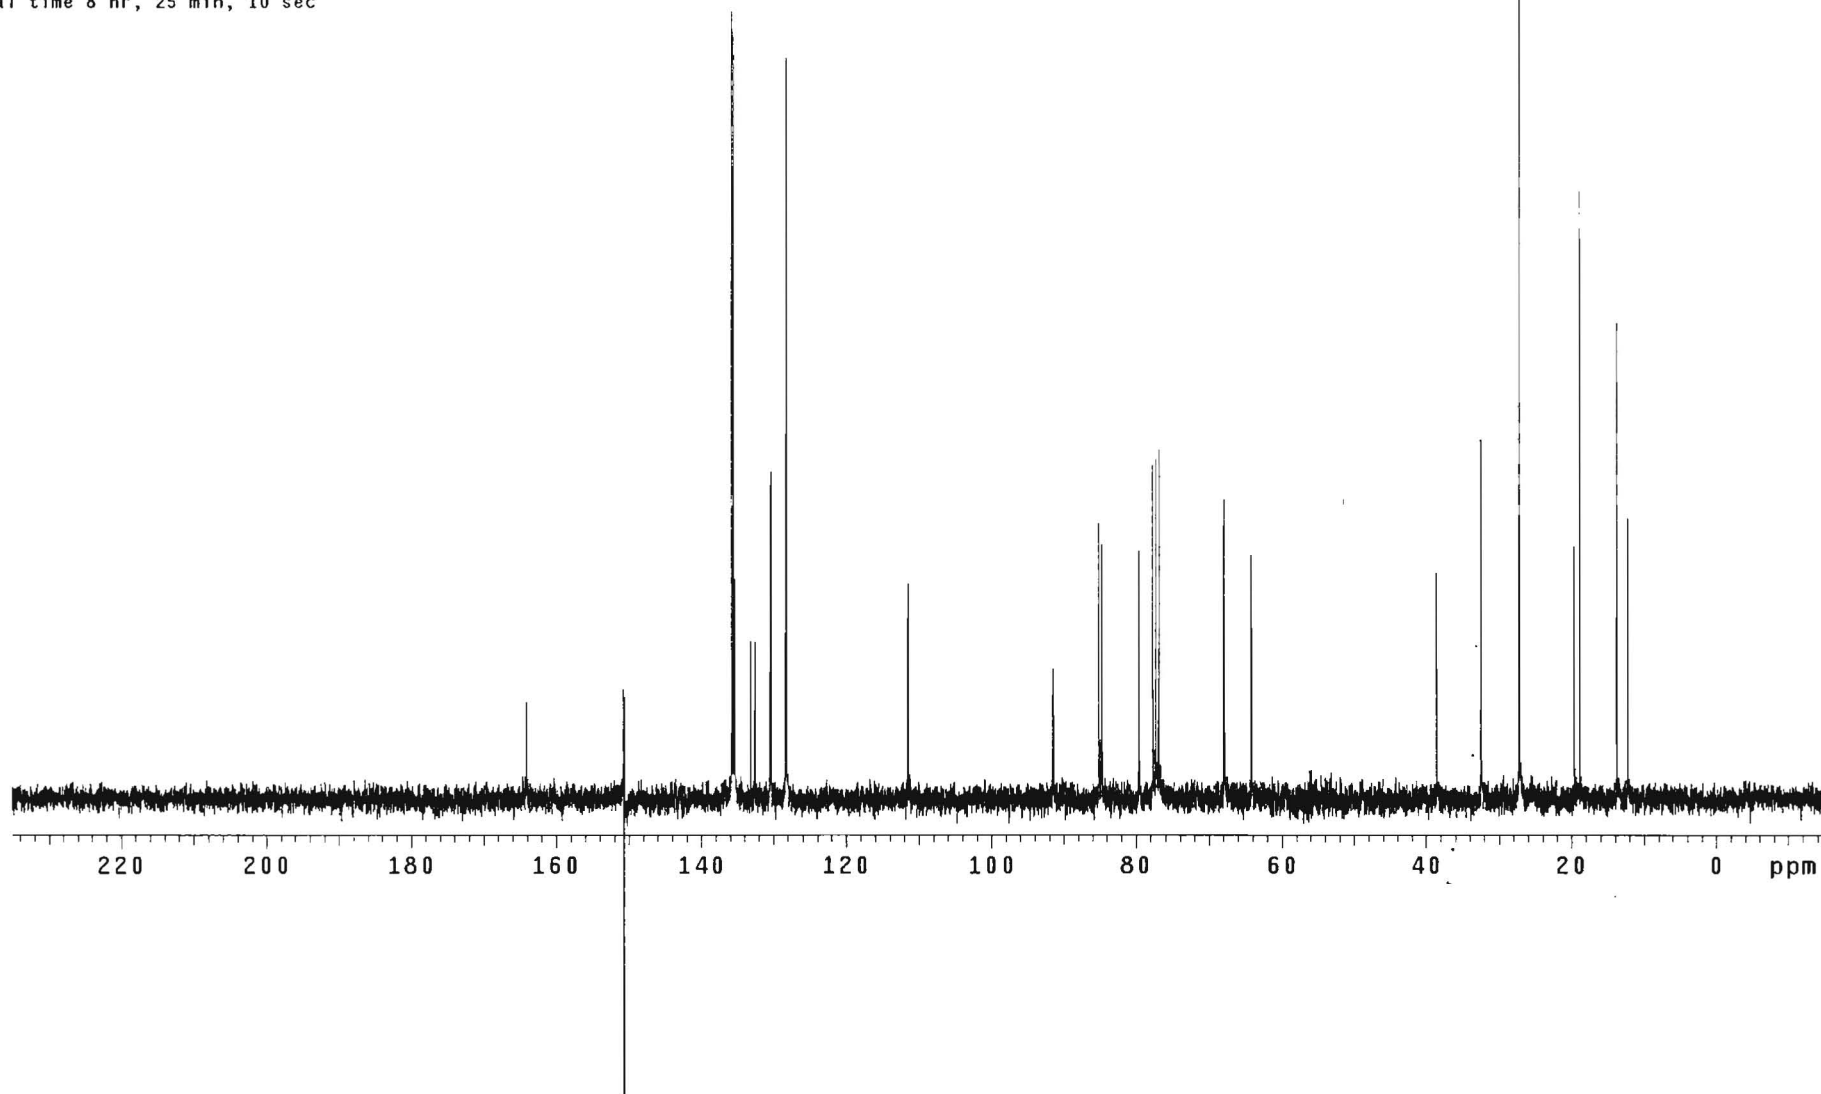

5'-TBDP50-dT-3'-OCH20-5'-dA(Bz)-3'-OTBS

Pulse Sequence: s2pu1

Solvent: CDC13

Ambient temperature

Mercury-300 "nmr300"

PULSE SEQUENCE

Relax. delay 1.000 sec

Pulse 64.3 degrees

Acq. time 1.994 sec

Width 3898.6 Hz

64 repetitions

OBSERVE H1, 299.9504945 MHz

DATA PROCESSING

FT size 16384

Total time 3 min, 18 sec

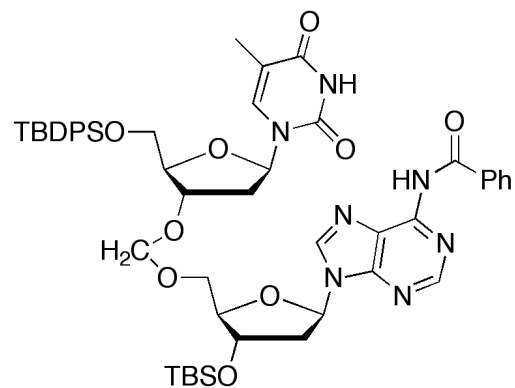

Dimer 9

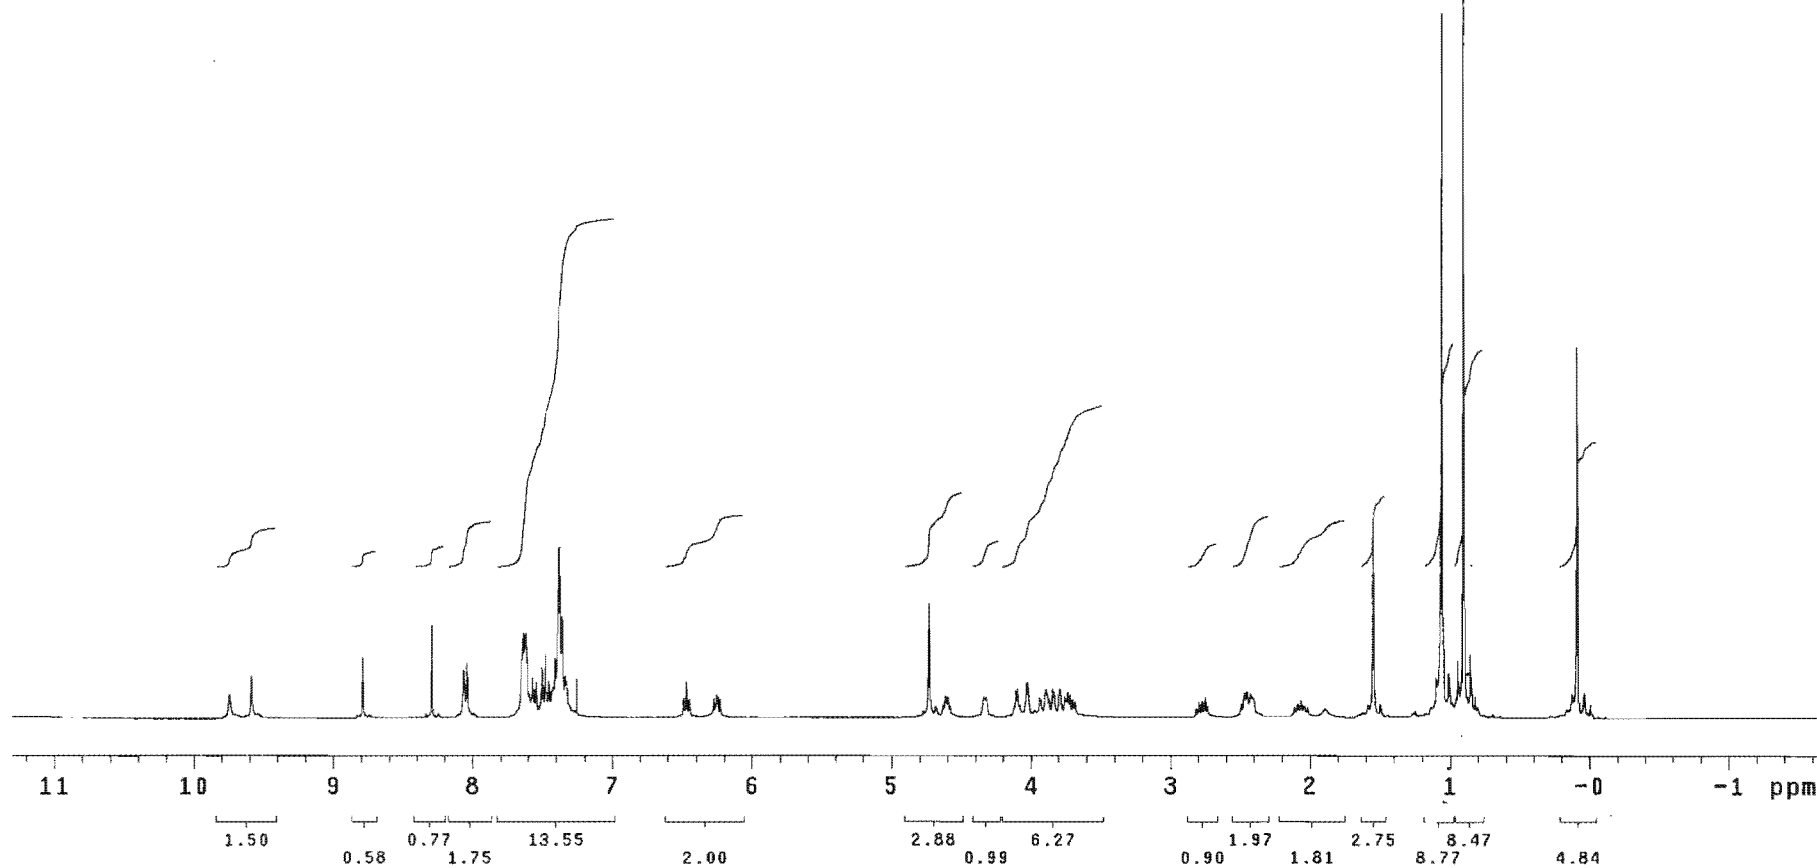

5'-TBDPSO-dT-3'-OCH2O-5'-dA(Bz)-3'-OTBS

Pulse Sequence: s2pu1

Solvent: CDC13  
Ambient temperature  
Mercury-300 "nmr300"

PULSE SEQUENCE

Relax. delay 1.000 sec  
Pulse 64.3 degrees  
Acq. time 1.994 sec  
Width 3898.6 Hz  
64 repetitions

OBSERVE H1, 299.9504945 MHz

DATA PROCESSING

FT size 16384

Total time 3 min, 18 sec

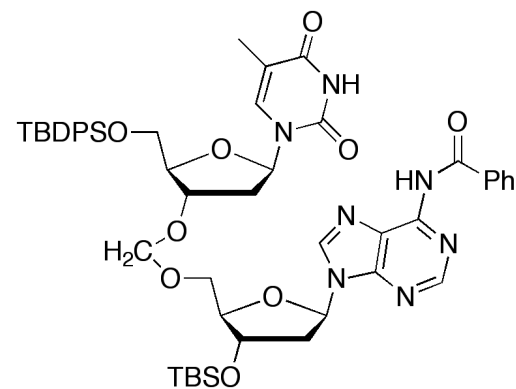

Dimer 9

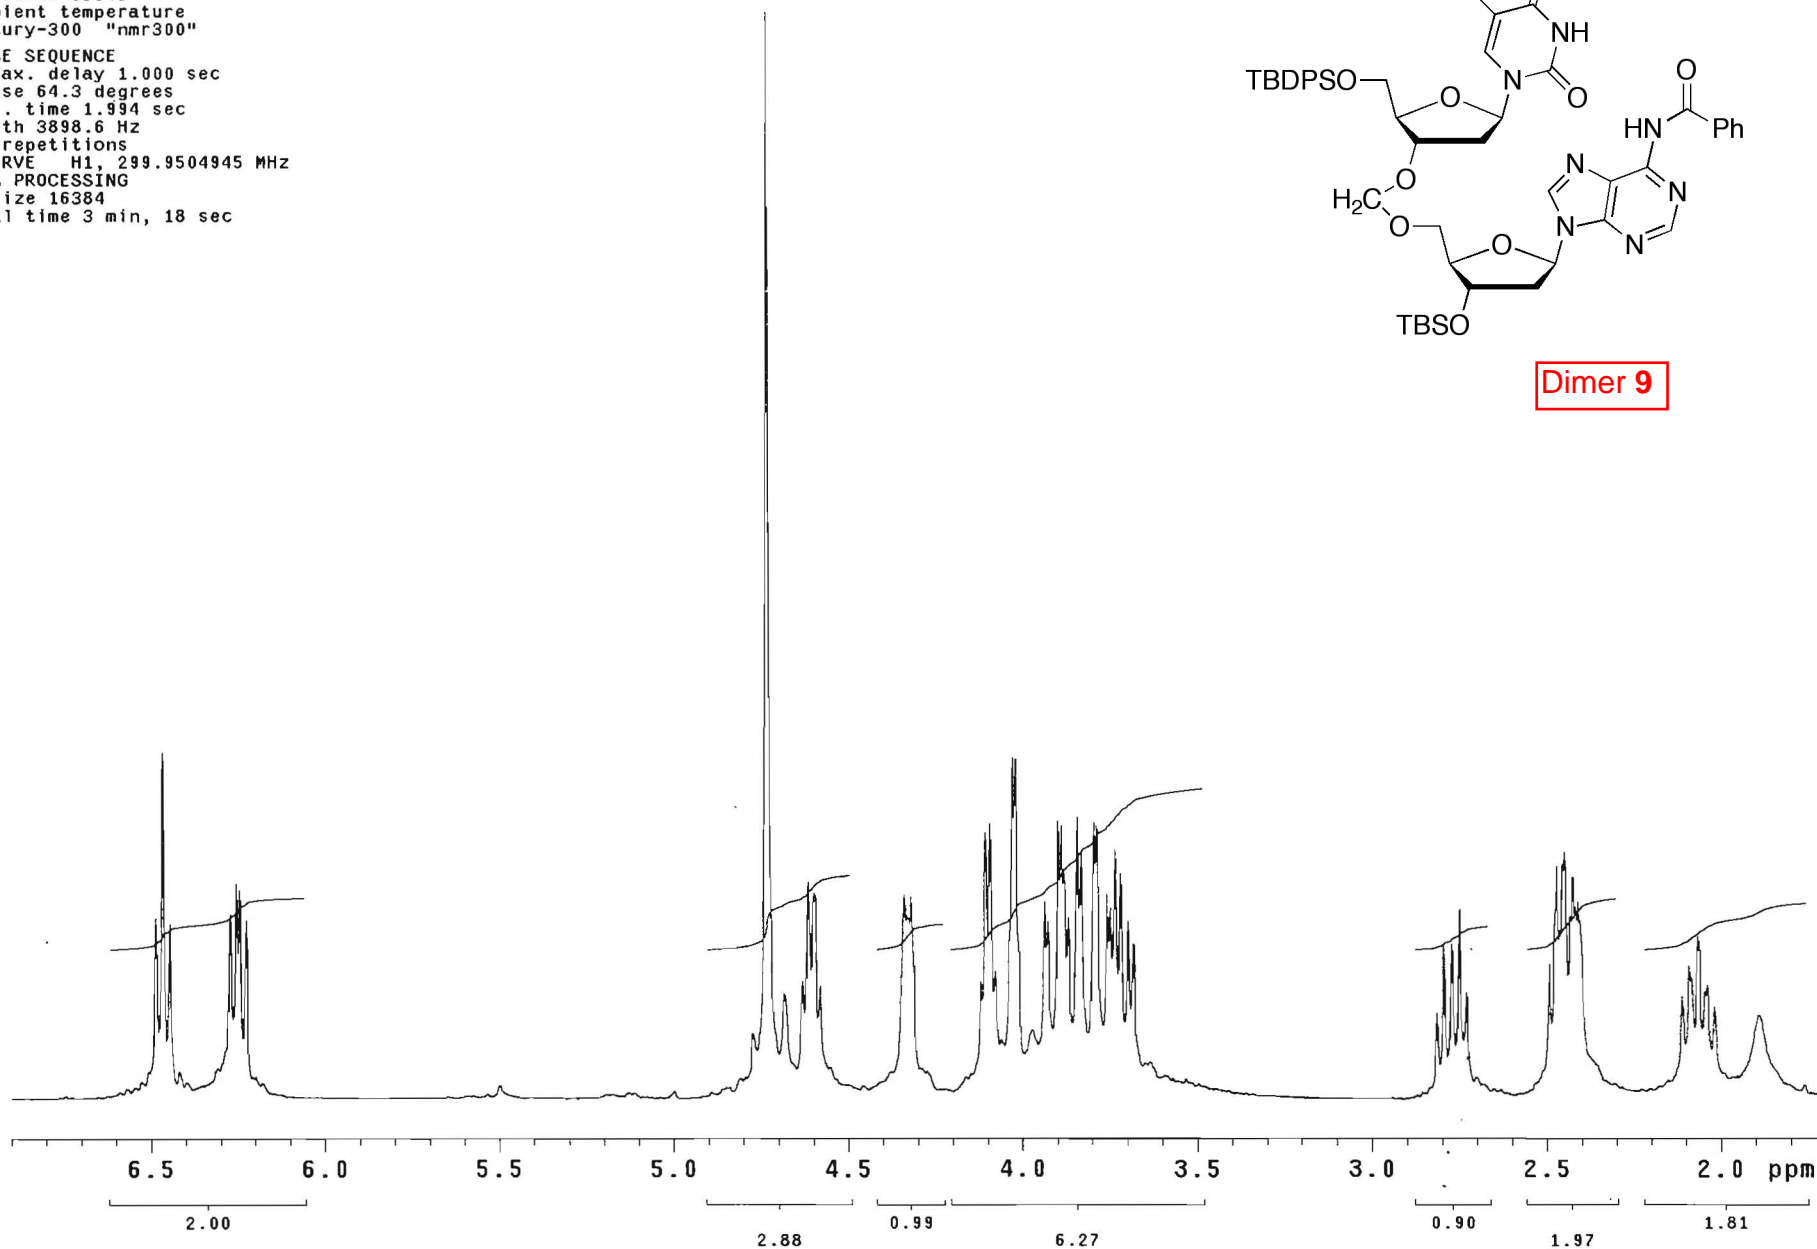

5'-TBDPSO-dT-3'-OCH2O-5'-dA(Bz)-3'-OTBS

Pulse Sequence: s2pu1

Solvent: CDC13

Ambient temperature

Mercury-300 "nmr300"

PULSE SEQUENCE

Relax. delay 1.000 sec

Pulse 56.6 degrees

Acq. time 1.738 sec

Width 18867.9 Hz

2528 repetitions

OBSERVE C13, 75.4225938 MHz

DECOUPLE H1, 299.9519364 MHz

Power 39 dB

continuously on

WALTZ-16 modulated

DATA PROCESSING

Line broadening 3.0 Hz

FT size 131072

Total time 84 hr, 3 min, 29 sec

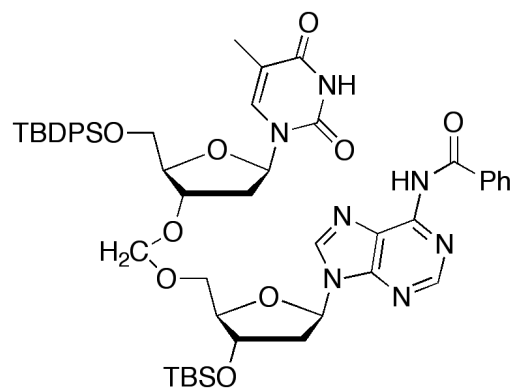

Dimer 9

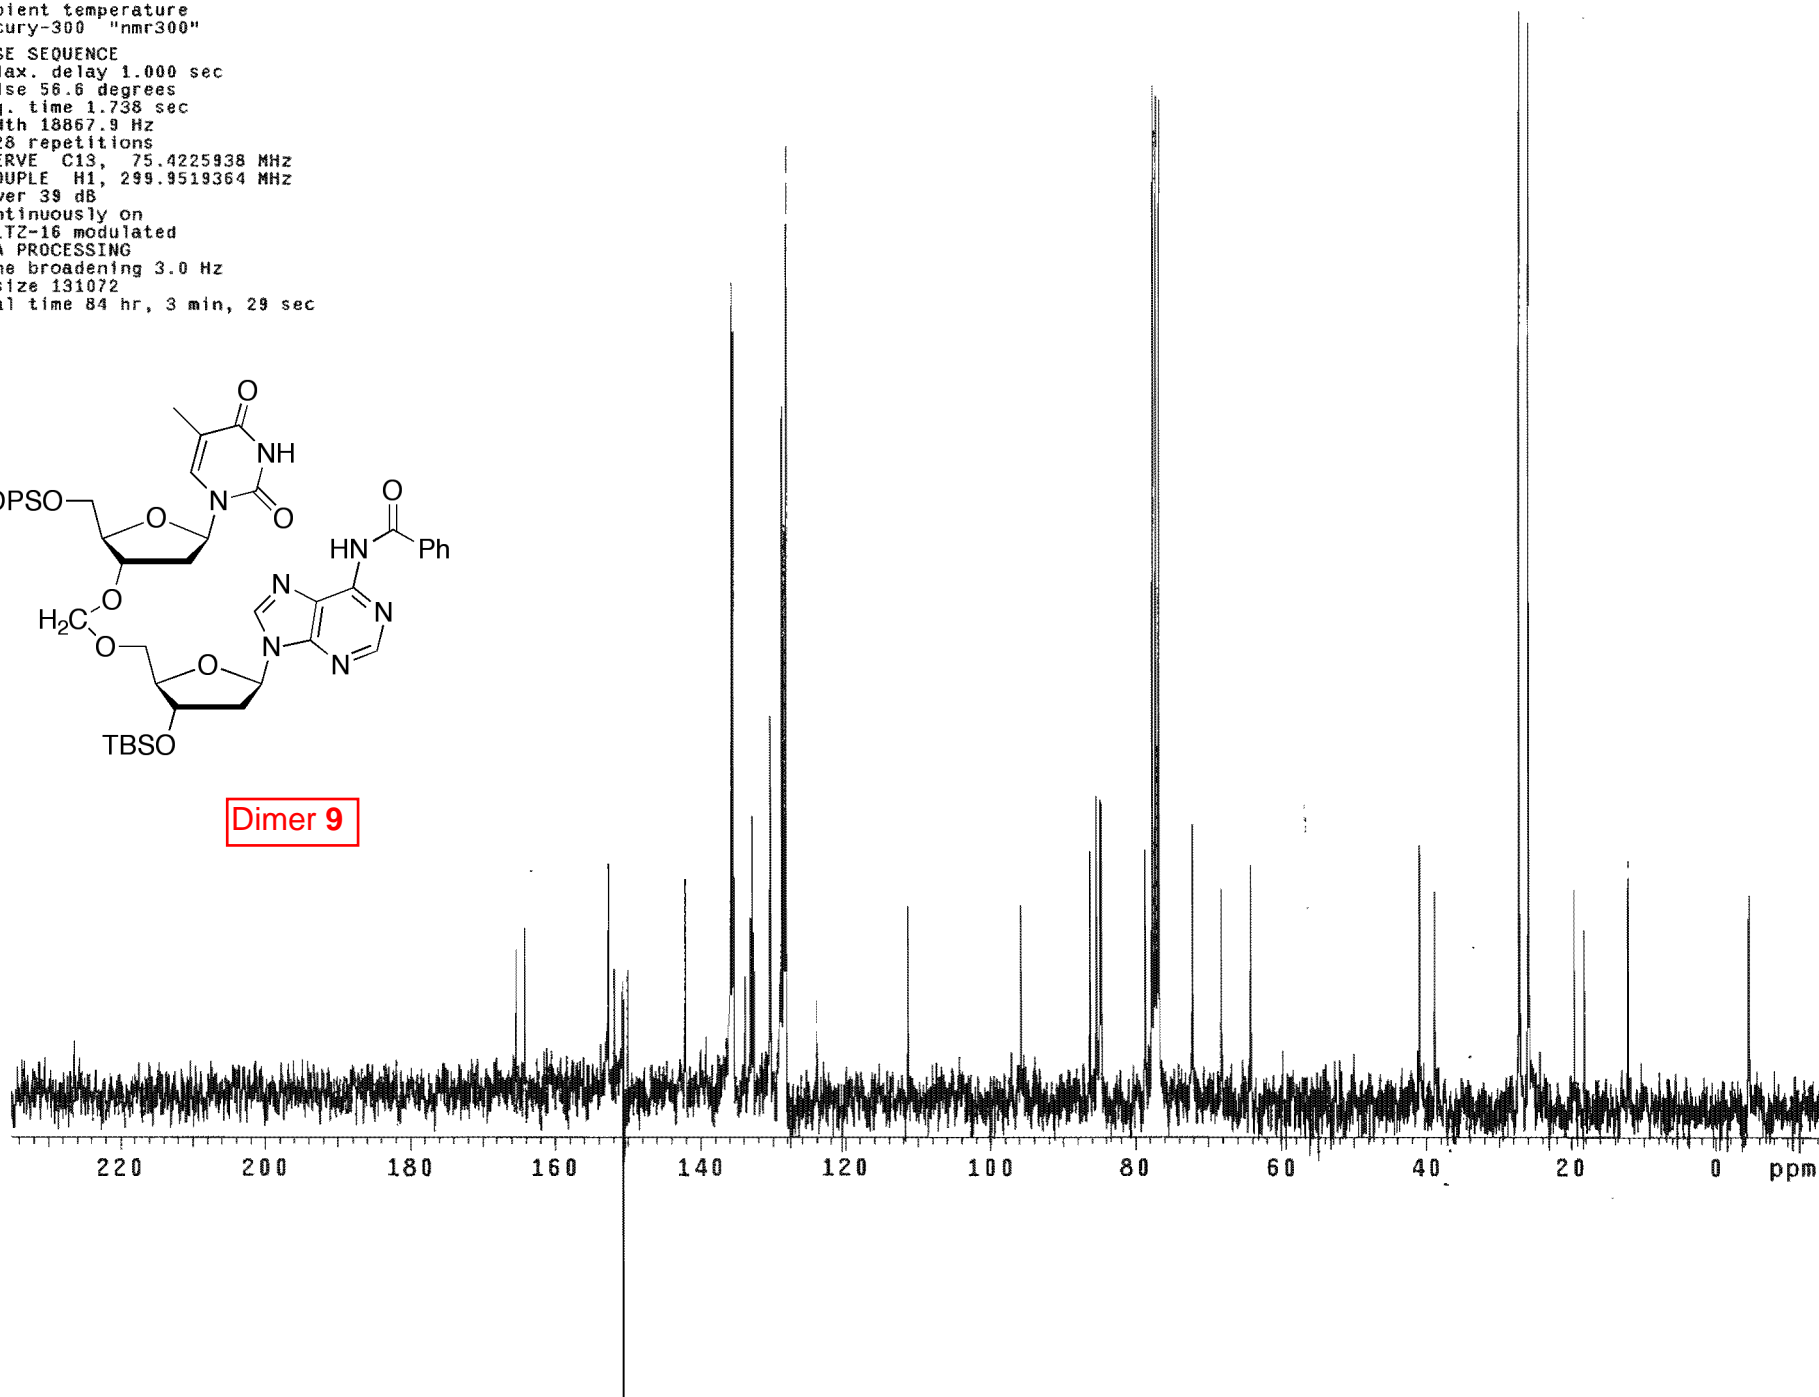

deprotected dimer in DMSO-d6  
83 mg

Label Assigned Value

|    |      |
|----|------|
| 1  | 1.82 |
| 2  | 0.95 |
| 3  | 0.88 |
| 4  | 1.96 |
| 5  | 3.72 |
| 6  | 1.00 |
| 7  | 1.01 |
| 8  | 0.90 |
| 9  | 0.95 |
| 10 | 1.98 |
| 11 | 0.96 |
| 12 | 0.98 |
| 13 | 0.89 |
| 14 | 0.90 |
| 15 | 1.97 |
| 16 | 1.69 |
| 17 | 3.56 |
| 18 | 0.88 |
| 19 | 0.86 |
| 20 | 1.87 |
| 21 | 2.78 |

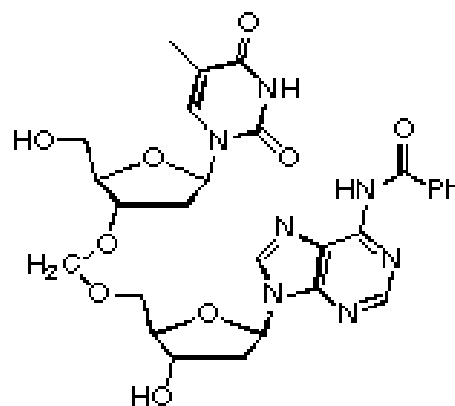

Dimer 10

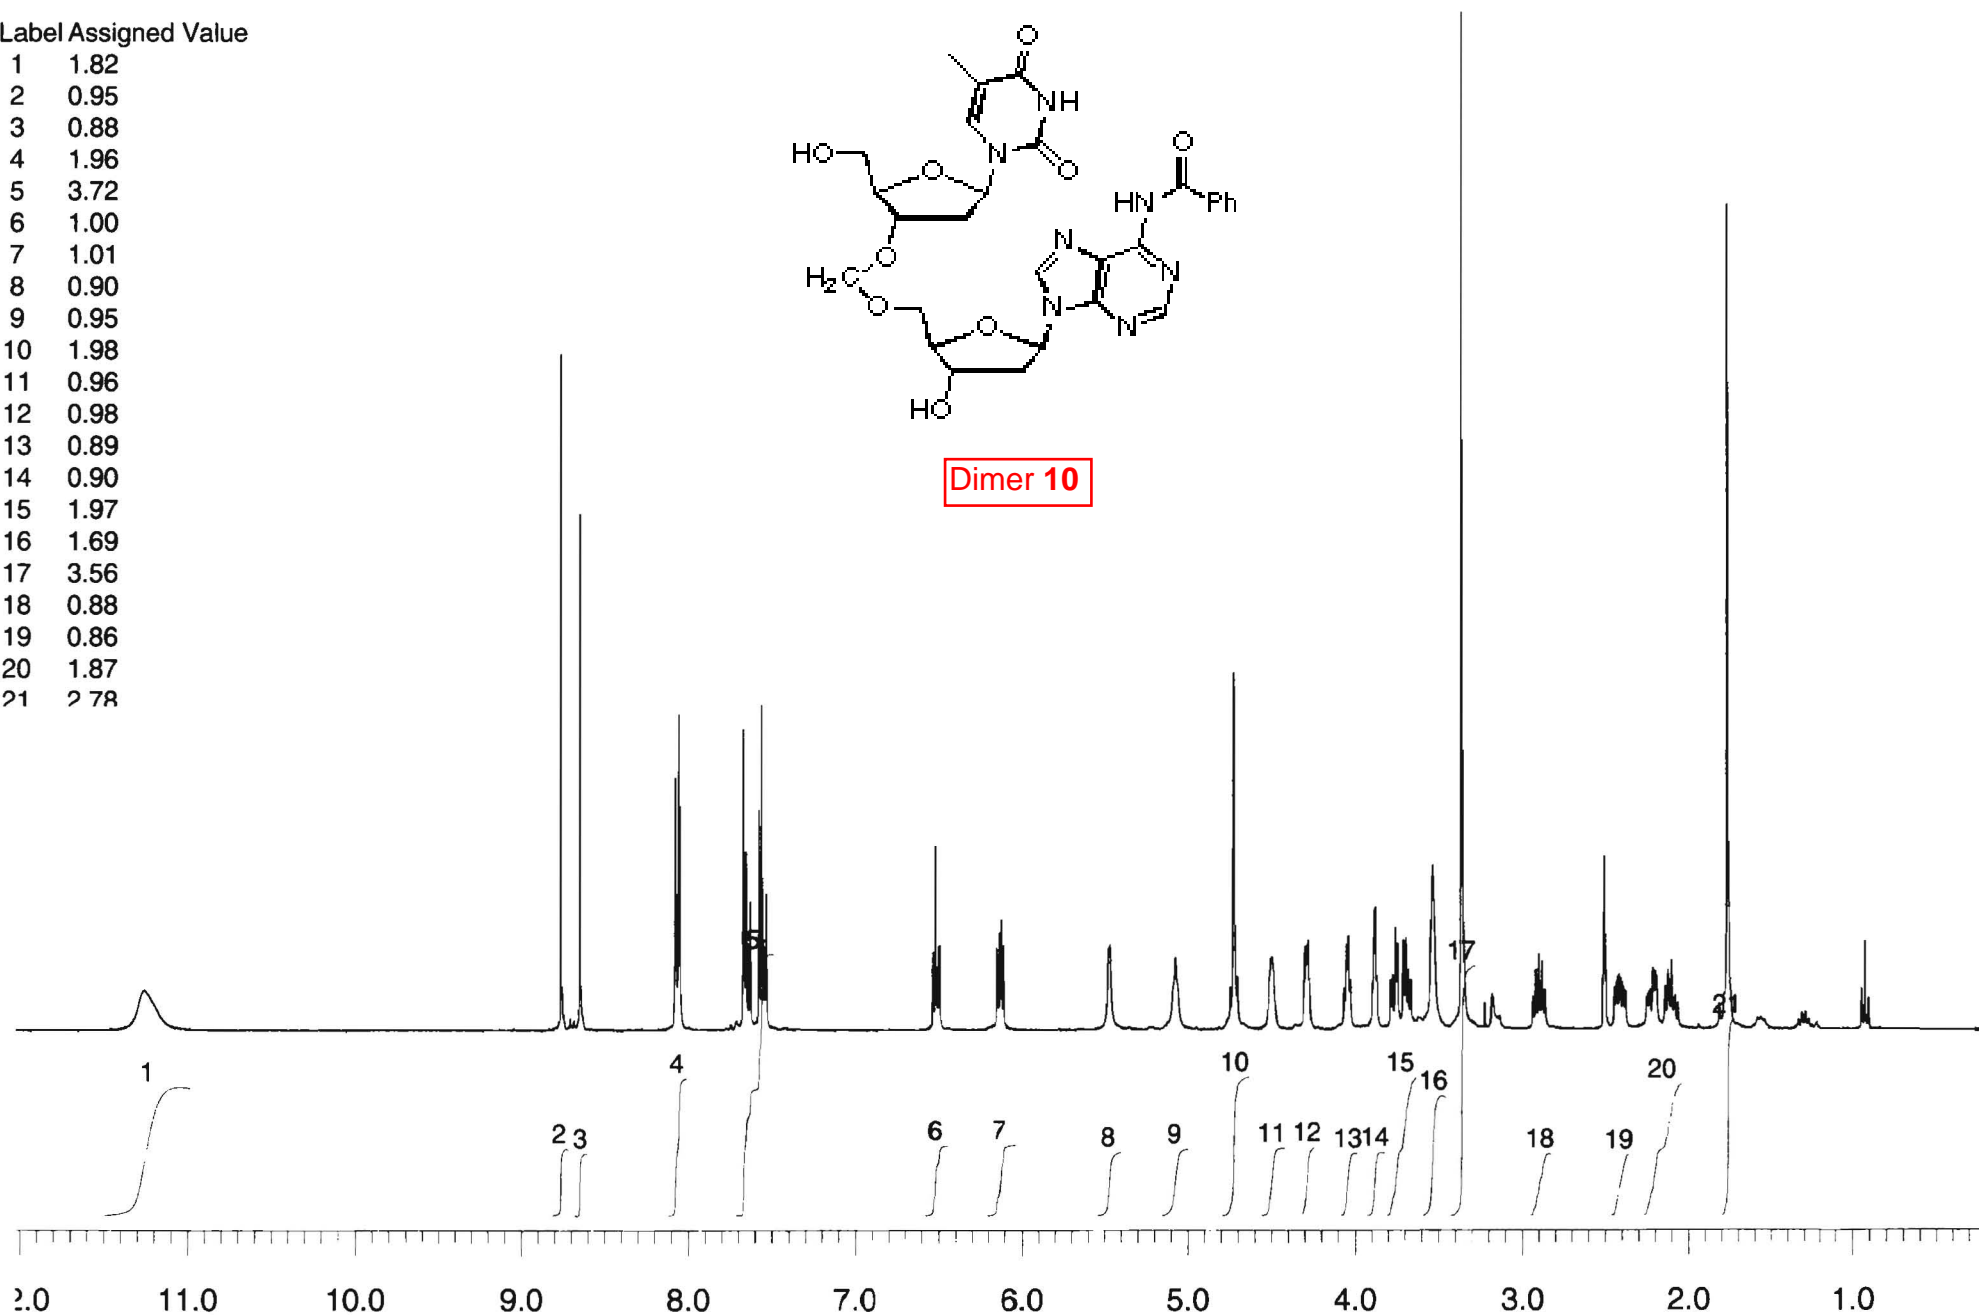

deprotected dimer in DMSO-d6  
83 mg

Label Assigned Value

|    |      |
|----|------|
| 1  | 1.82 |
| 2  | 0.95 |
| 3  | 0.88 |
| 4  | 1.96 |
| 5  | 3.72 |
| 6  | 1.00 |
| 7  | 1.01 |
| 8  | 0.90 |
| 9  | 0.95 |
| 10 | 1.98 |
| 11 | 0.96 |
| 12 | 0.98 |
| 13 | 0.89 |
| 14 | 0.90 |
| 15 | 1.97 |
| 16 | 1.69 |
| 17 | 3.56 |
| 18 | 0.88 |
| 19 | 0.86 |
| 20 | 1.87 |
| 21 | 2.78 |

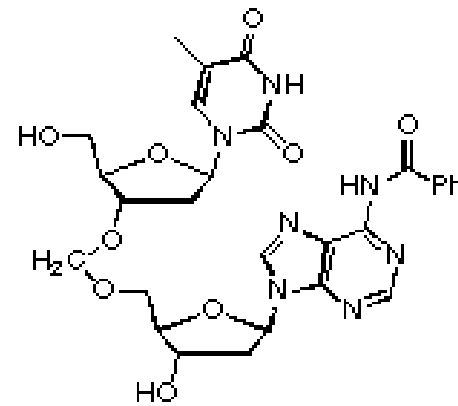

Dimer 10

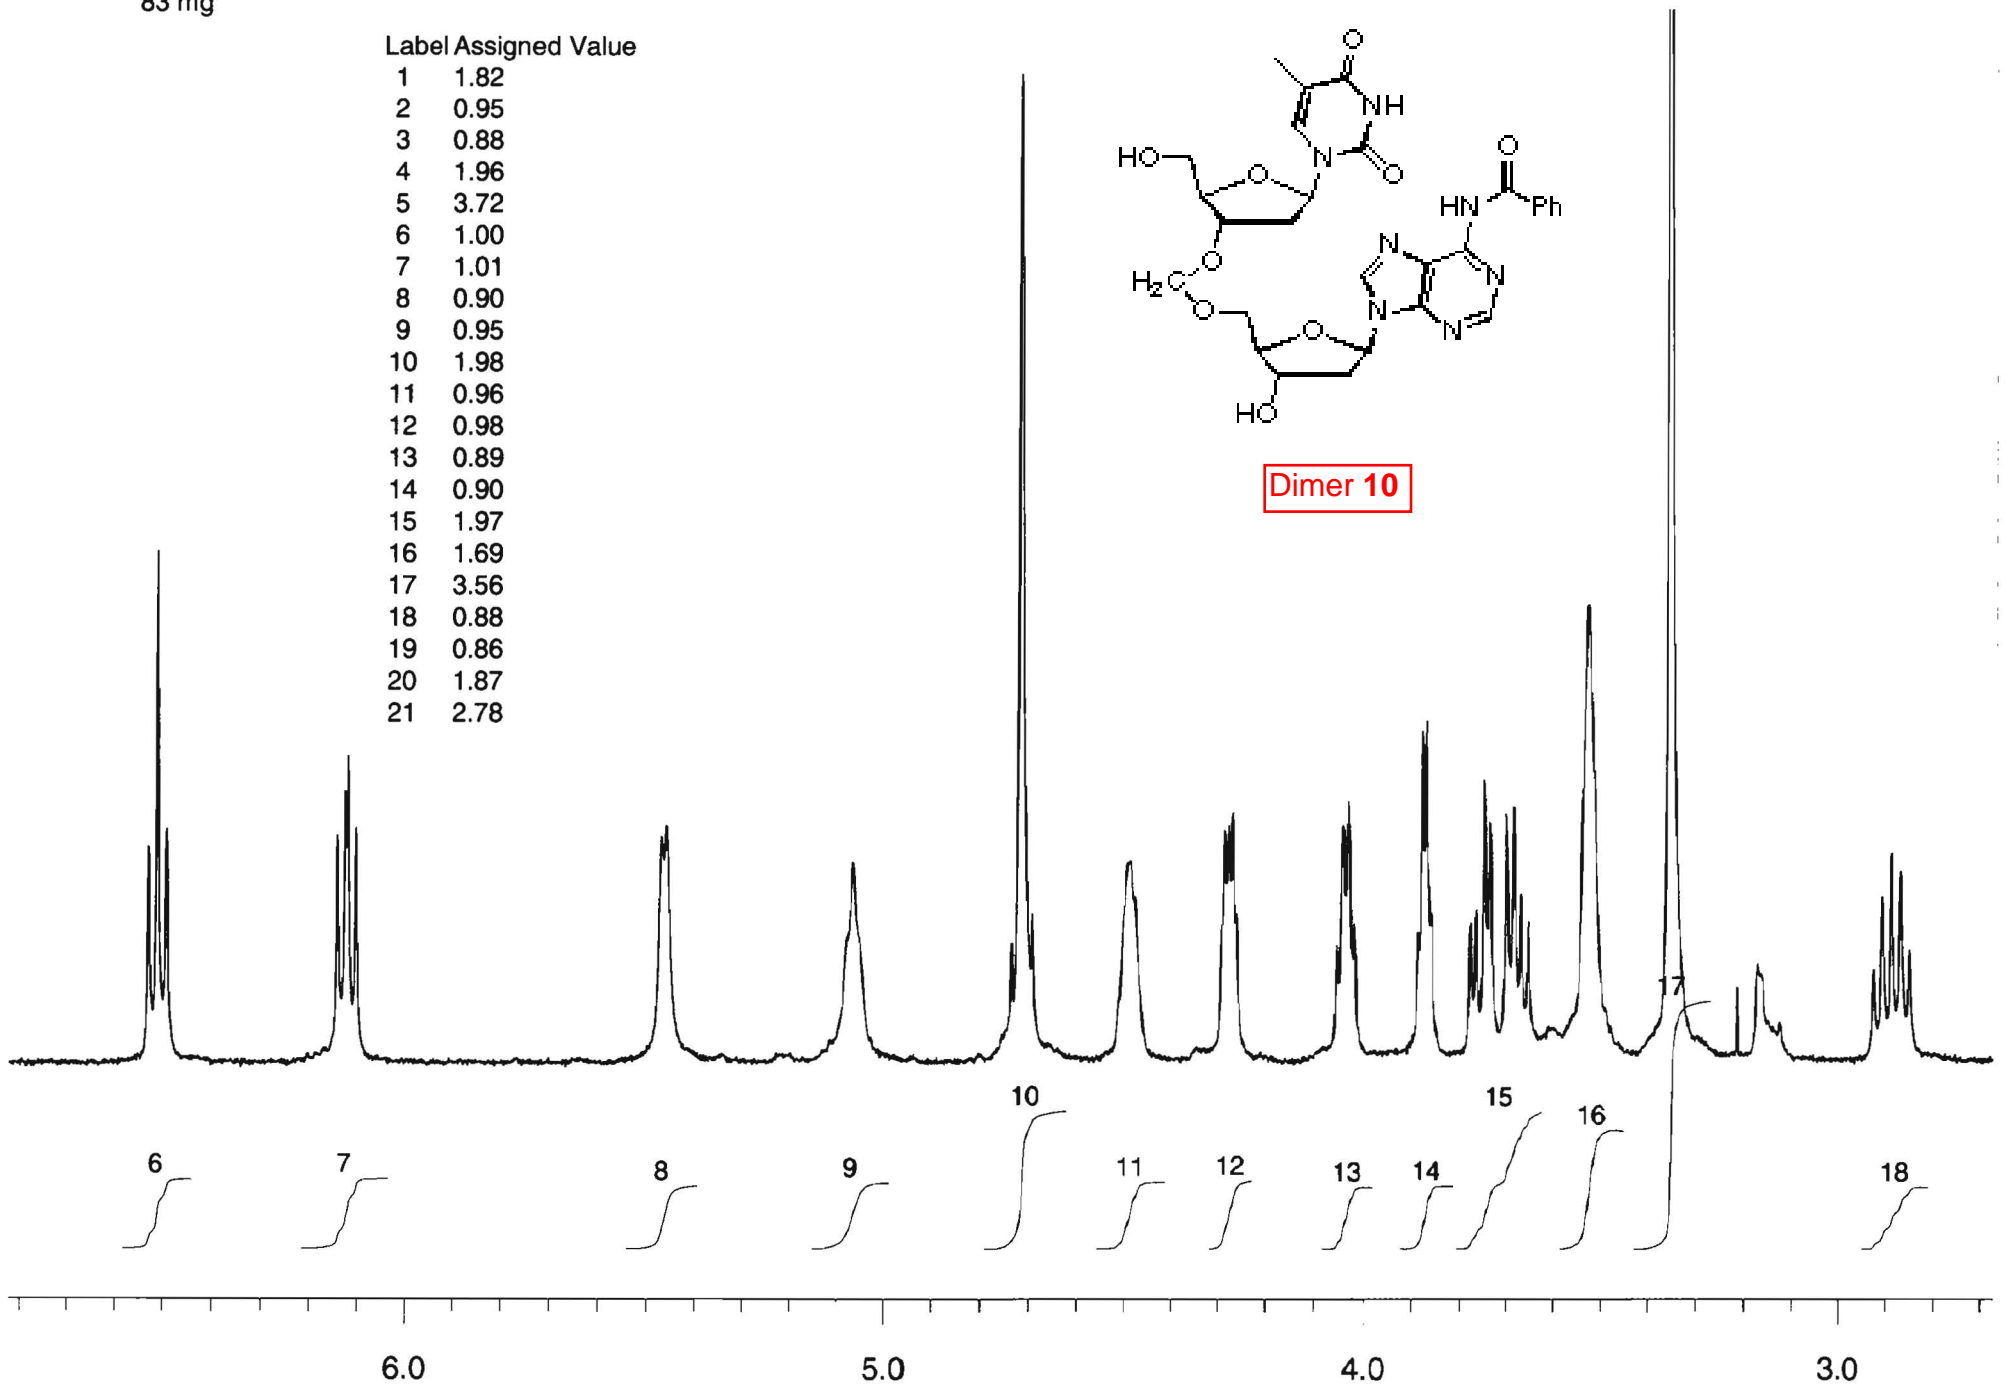



C-13 NMR er\_1\_274  
deprotected dimer in DMSO-d6

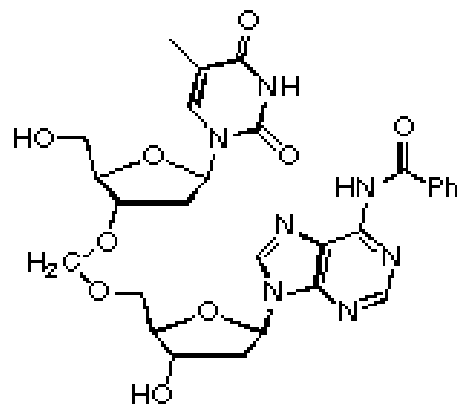

**Dimer 10**

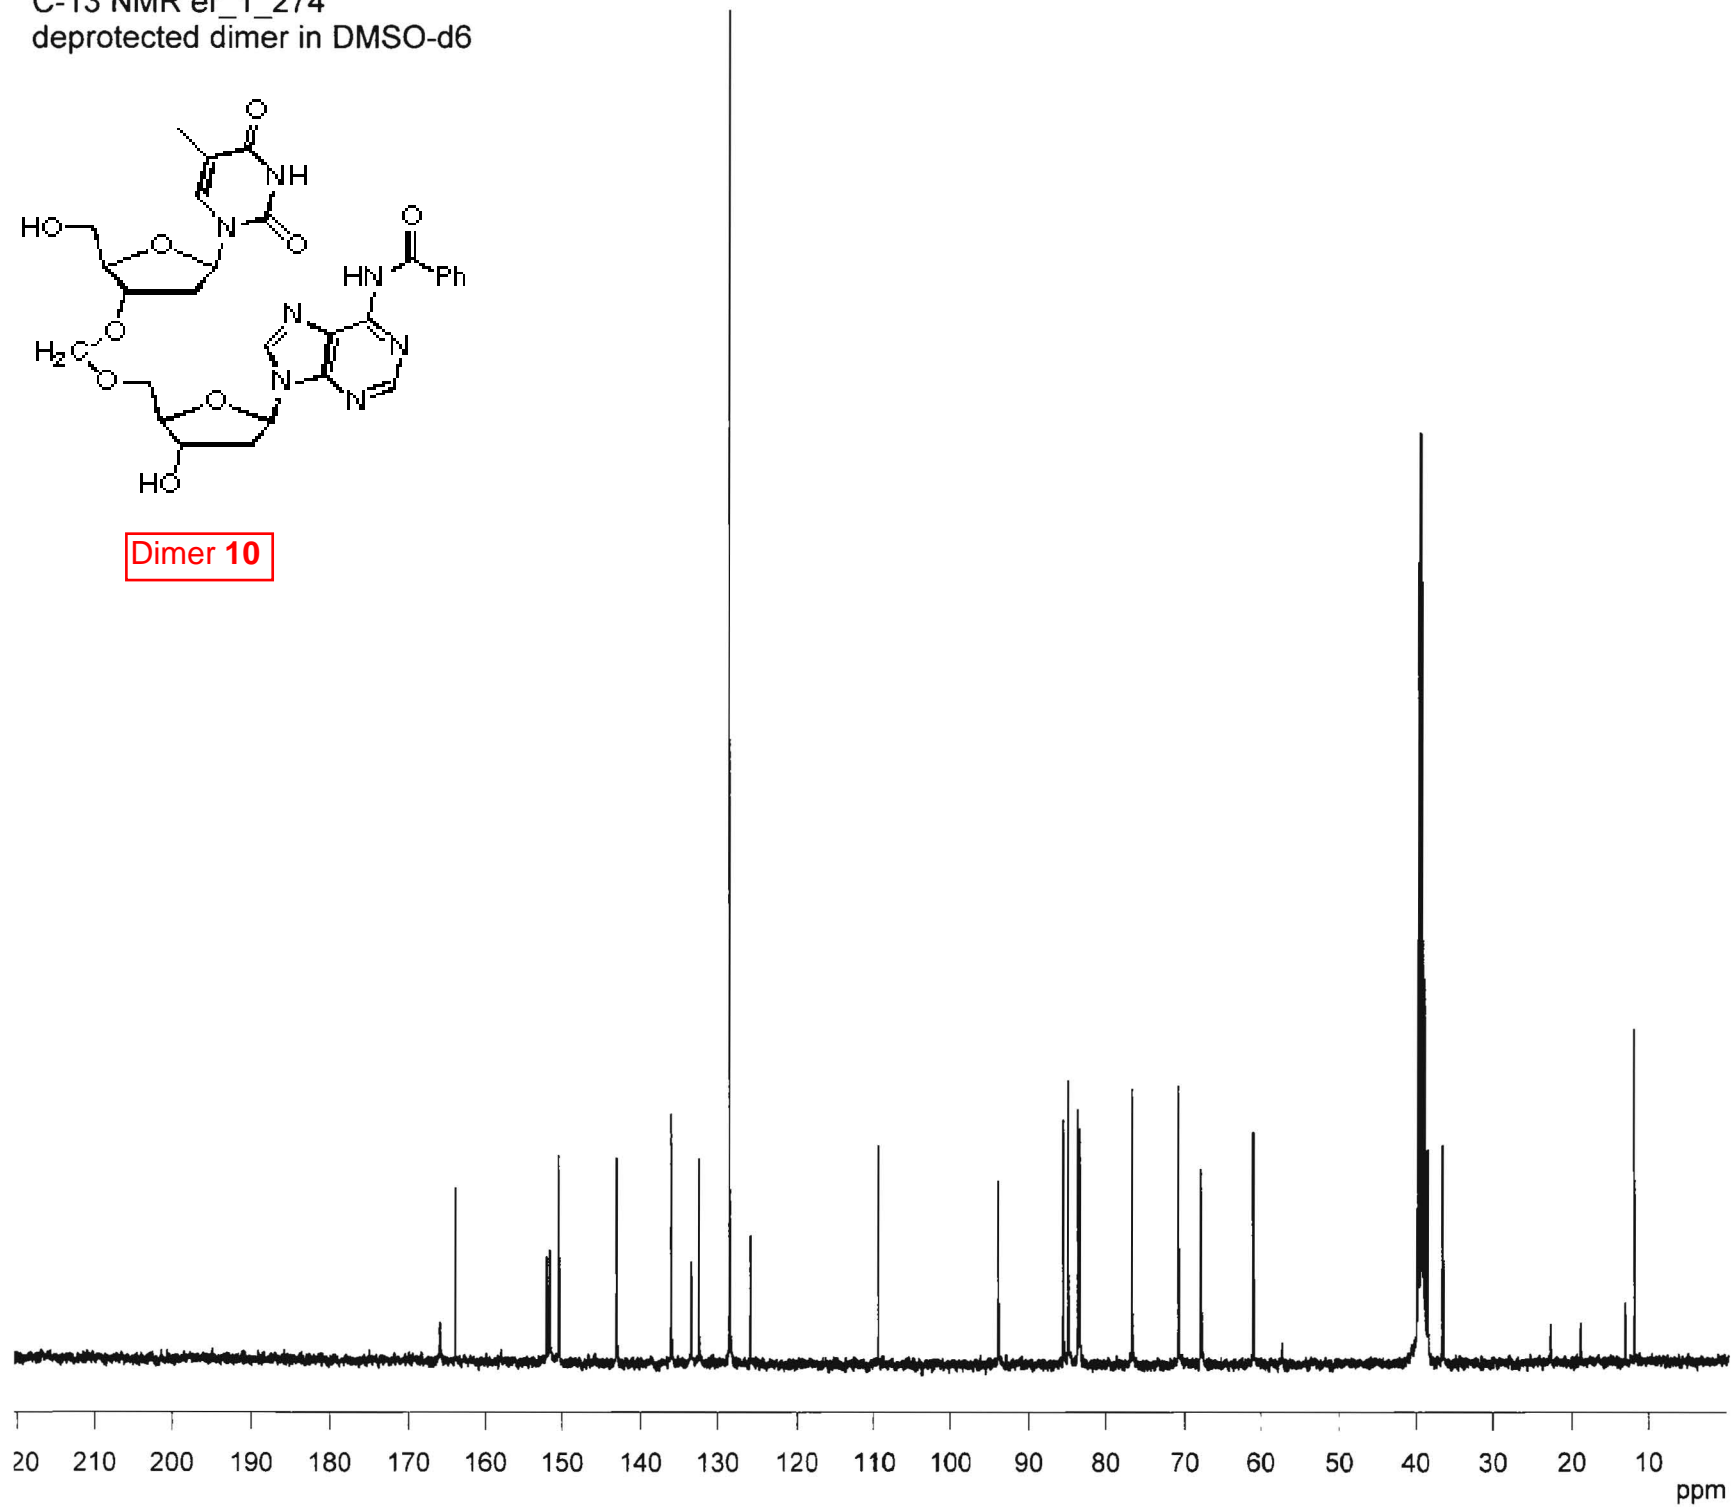

Label Assigned Value

|    |       |
|----|-------|
| 1  | 0.65  |
| 2  | 1.03  |
| 3  | 1.07  |
| 4  | 2.21  |
| 5  | 0.44  |
| 6  | 15.54 |
| 7  | 4.47  |
| 8  | 1.00  |
| 9  | 1.06  |
| 10 | 2.12  |
| 11 | 0.97  |
| 12 | 1.02  |
| 13 | 3.04  |
| 14 | 0.91  |
| 15 | 7.68  |
| 16 | 1.02  |
| 17 | 0.94  |
| 18 | 1.26  |
| 19 | 0.92  |
| 20 | 1.94  |
| 21 | 0.97  |
| 22 | 3.59  |

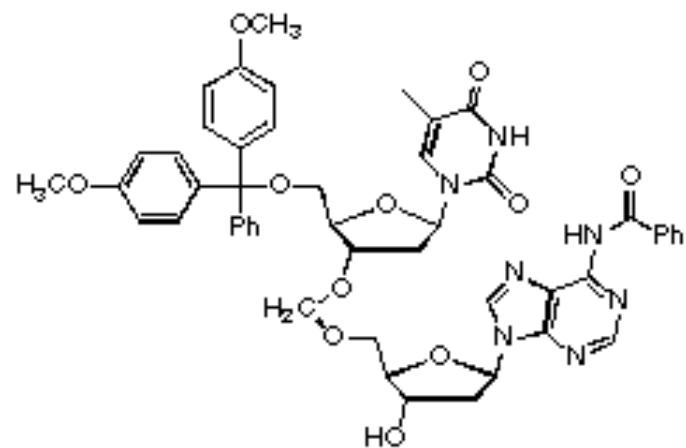

Dimer 11

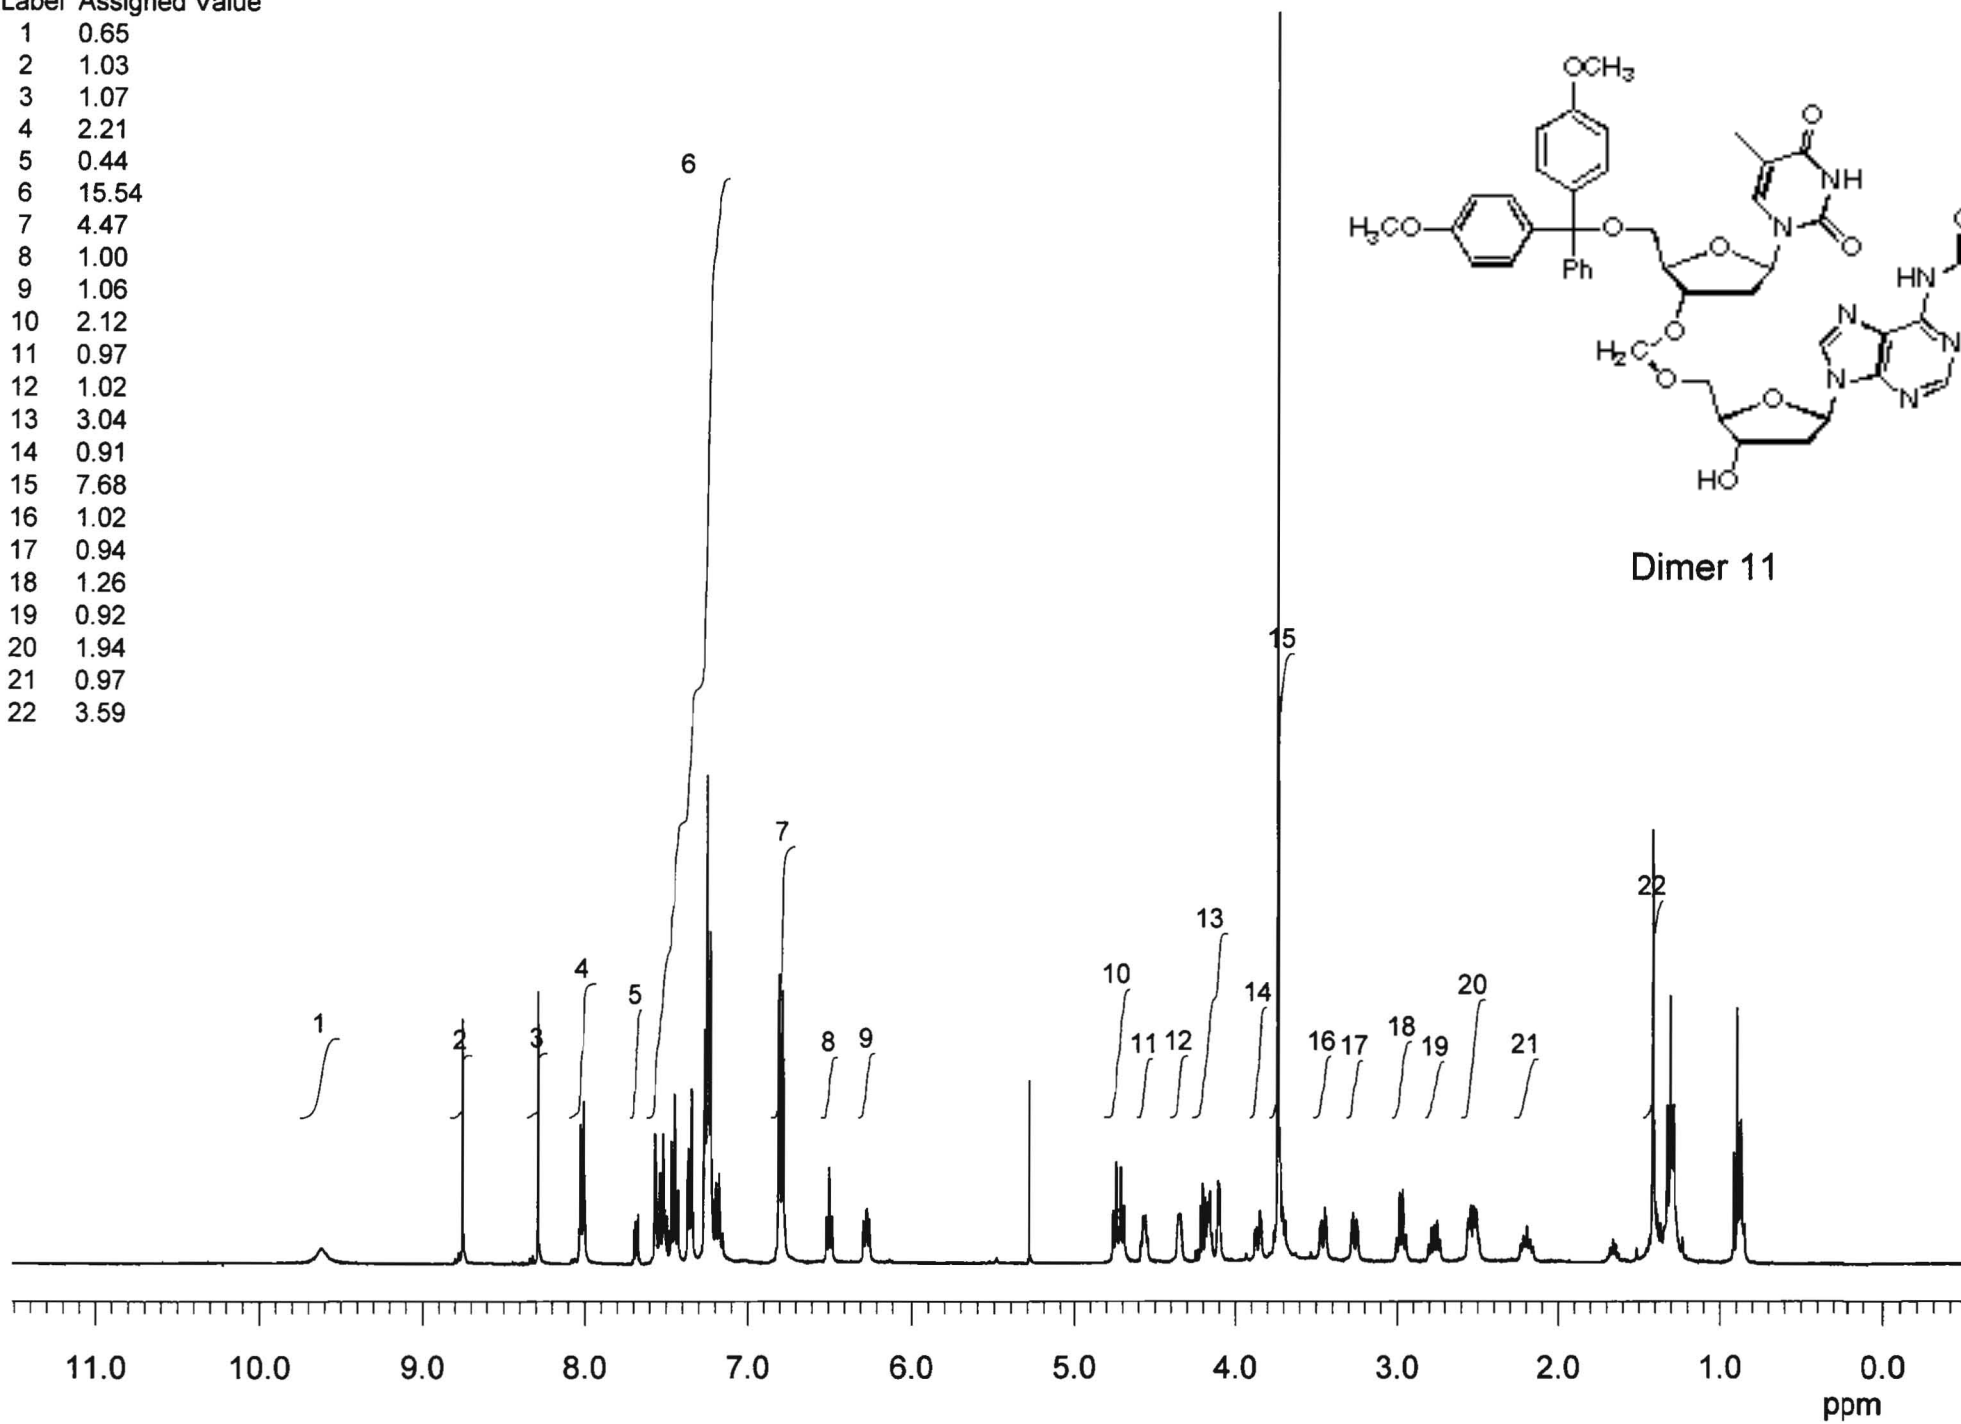

Dimer 11

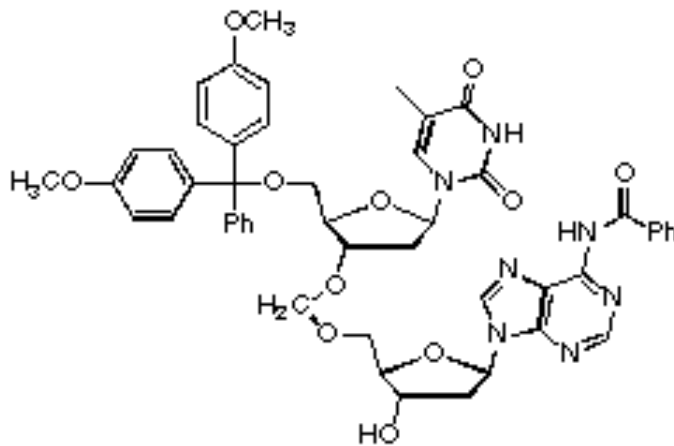

| Label | Assigned Value |
|-------|----------------|
| 1     | 0.65           |
| 2     | 1.03           |
| 3     | 1.07           |
| 4     | 2.21           |
| 5     | 0.44           |
| 6     | 15.54          |
| 7     | 4.47           |
| 8     | 1.00           |
| 9     | 1.06           |
| 10    | 2.12           |
| 11    | 0.97           |
| 12    | 1.02           |
| 13    | 3.04           |
| 14    | 0.91           |
| 15    | 7.68           |
| 16    | 1.02           |
| 17    | 0.94           |
| 18    | 1.26           |
| 19    | 0.92           |
| 20    | 1.94           |
| 21    | 0.97           |
| 22    | 3.59           |

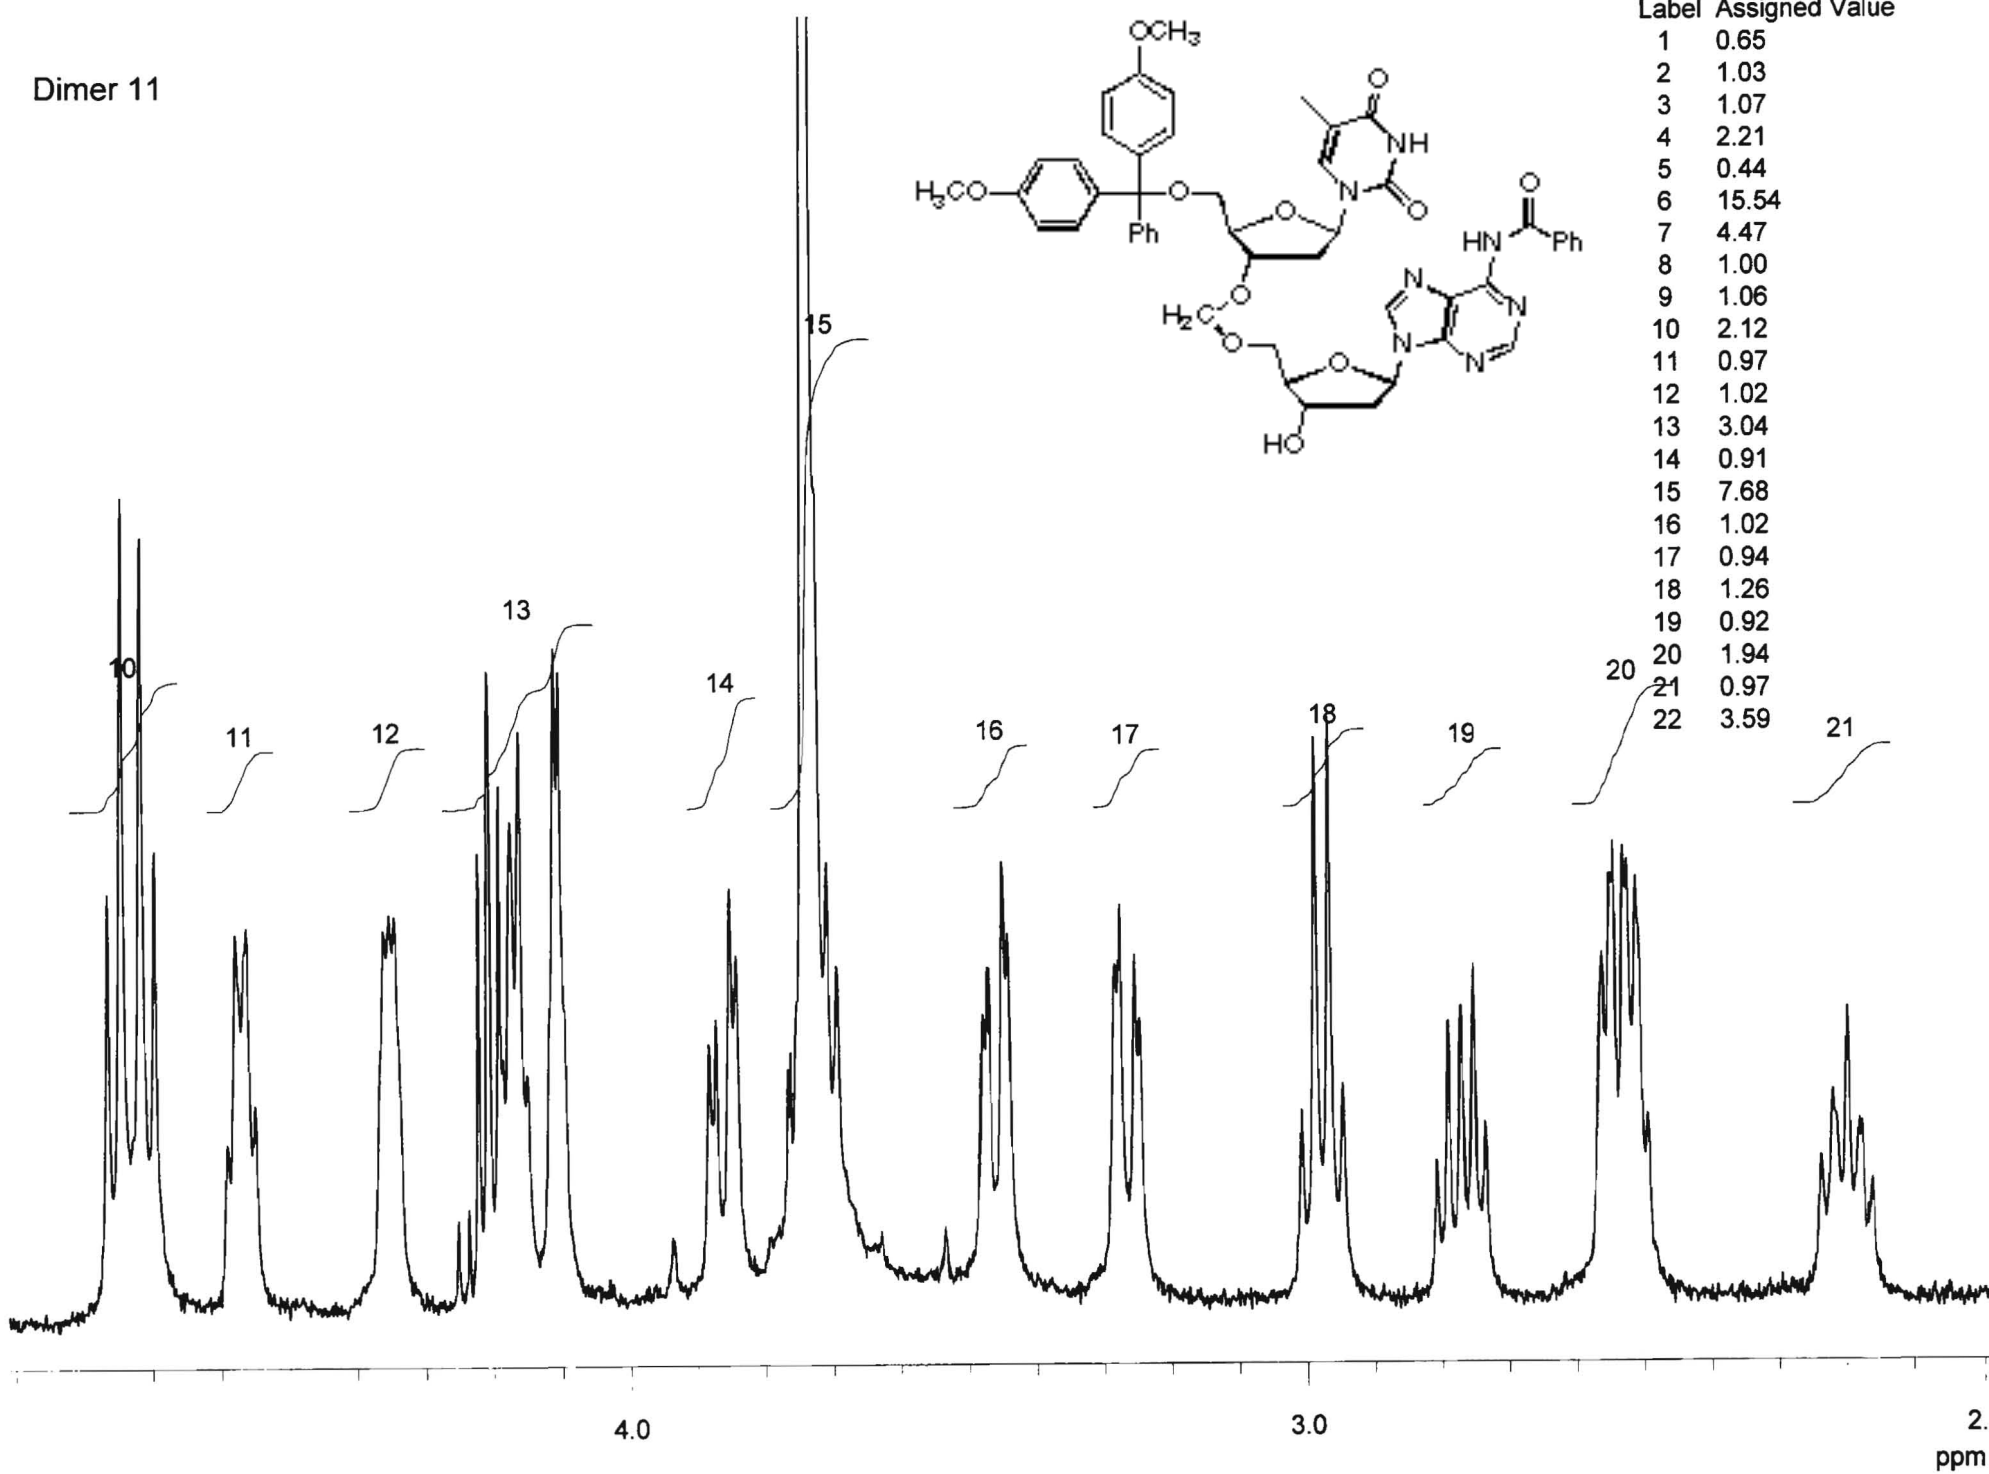

ppm

Label Assigned Value

|    |       |
|----|-------|
| 1  | 1.01  |
| 2  | 0.90  |
| 3  | 2.12  |
| 4  | 0.93  |
| 5  | 1.90  |
| 6  | 1.87  |
| 7  | 2.68  |
| 8  | 7.04  |
| 9  | 4.08  |
| 10 | 1.00  |
| 11 | 0.92  |
| 12 | 2.96  |
| 13 | 0.97  |
| 14 | 2.79  |
| 15 | 0.86  |
| 16 | 12.30 |
| 17 | 0.76  |
| 18 | 1.78  |
| 19 | 0.98  |
| 20 | 3.16  |
| 21 | 3.47  |
| 22 | 1.98  |
| 23 | 0.76  |
| 24 | 28.10 |
| 25 | 5.95  |

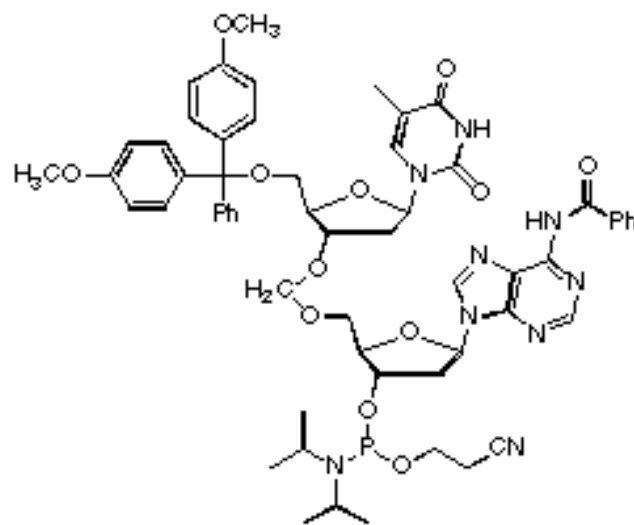

Dimer 12

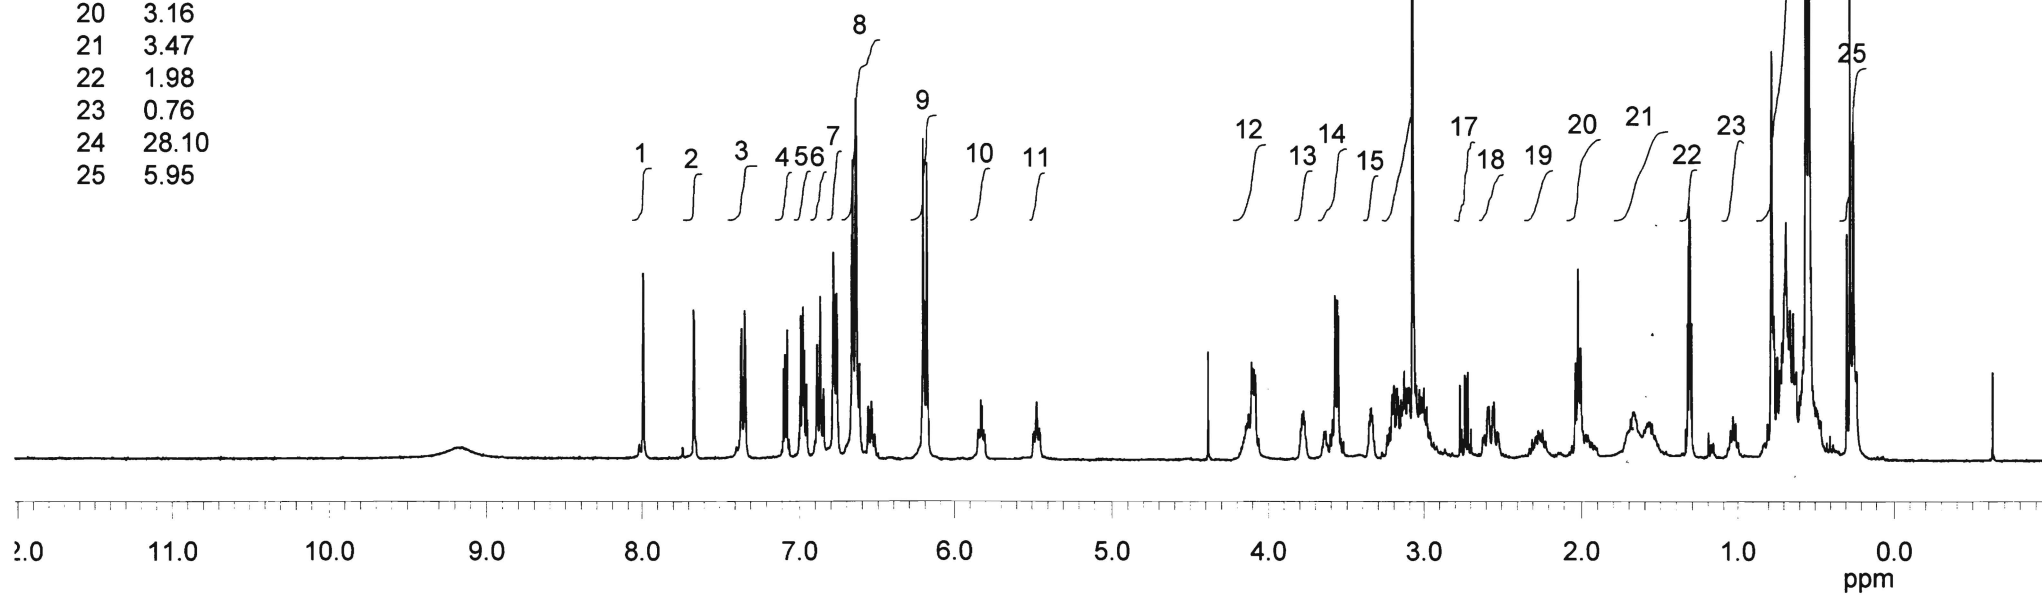



P-31 SHIFTS REL. TO 85% H3PO4 (: = 0 PPM)

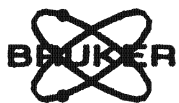

ERER1104.P1D  
AU PROG:  
ZG.AU

SF 121.497  
SF2 121.497  
SY 121.0  
O1 75699.848  
SI 65536  
TD 65536  
SW 125000.000  
SW2 1.25000E5  
HZ/PT 3.815

PW 5.0  
RD 1.000  
AQ .262  
NS 3328

DE 8.2  
O2 6313.000  
DP 20H CPD

LB 1.000  
HZ/CM 971.985  
PPM/CM 8.000  
SR 75692.22

D1 5.0000000  
RD 1.0000000  
PW 5.00  
DE 8.20  
NS 3328  
DS 0  
NE 1000

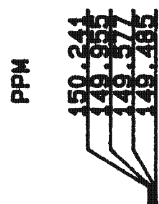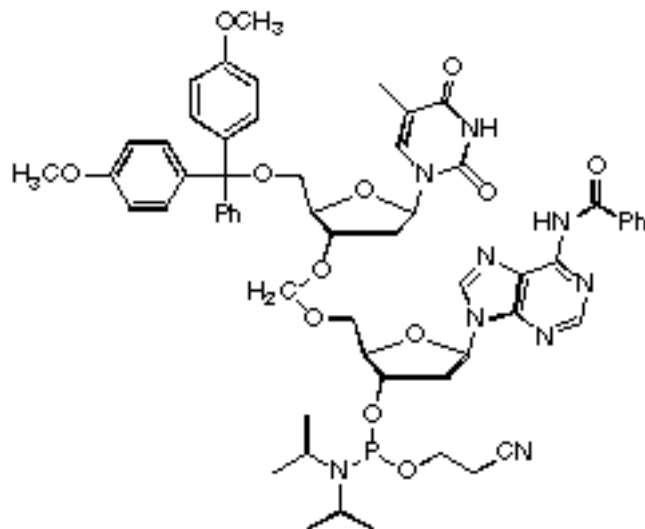

Dimer 12

8.852

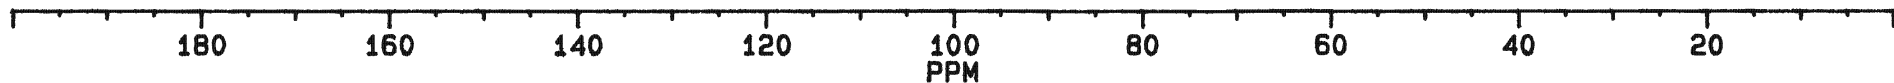

P-31 SHIFTS REL. TO 85% H3PO4 (: = 0 PPM)

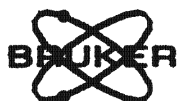

PPM

ERER1104.P1D  
AU PROG:  
ZG.AU

SF 121.497  
SF2 121.497  
SY 121.0  
O1 75699.848  
SI 65536  
TD 65536  
SW 125000.000  
SW2 1.25000E5  
HZ/PT 3.815

PW 5.0  
RD 1.000  
AQ .262  
NS 3328

DE 8.2  
O2 6313.000  
DP 20H CPD

LB 1.000  
HZ/CM 48.523  
PPM/CM .399  
SR 75692.22

D1 5.0000000  
RD 1.0000000  
PW 5.00  
DE 8.20  
NS 3328  
DS 0  
NE 1000

150.241  
149.955  
149.577  
149.465

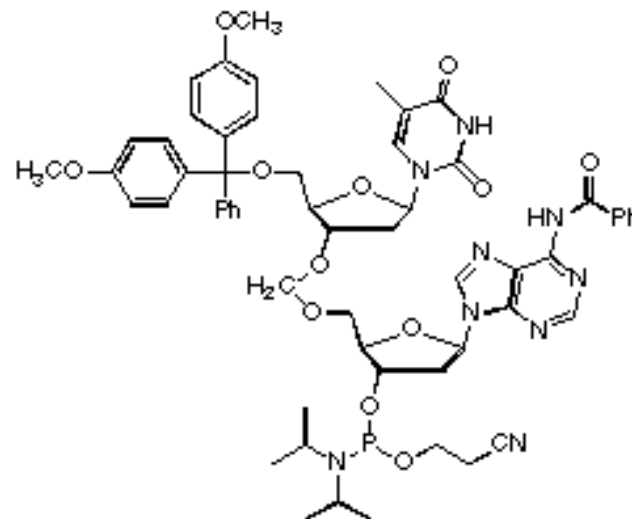

Dimer 12

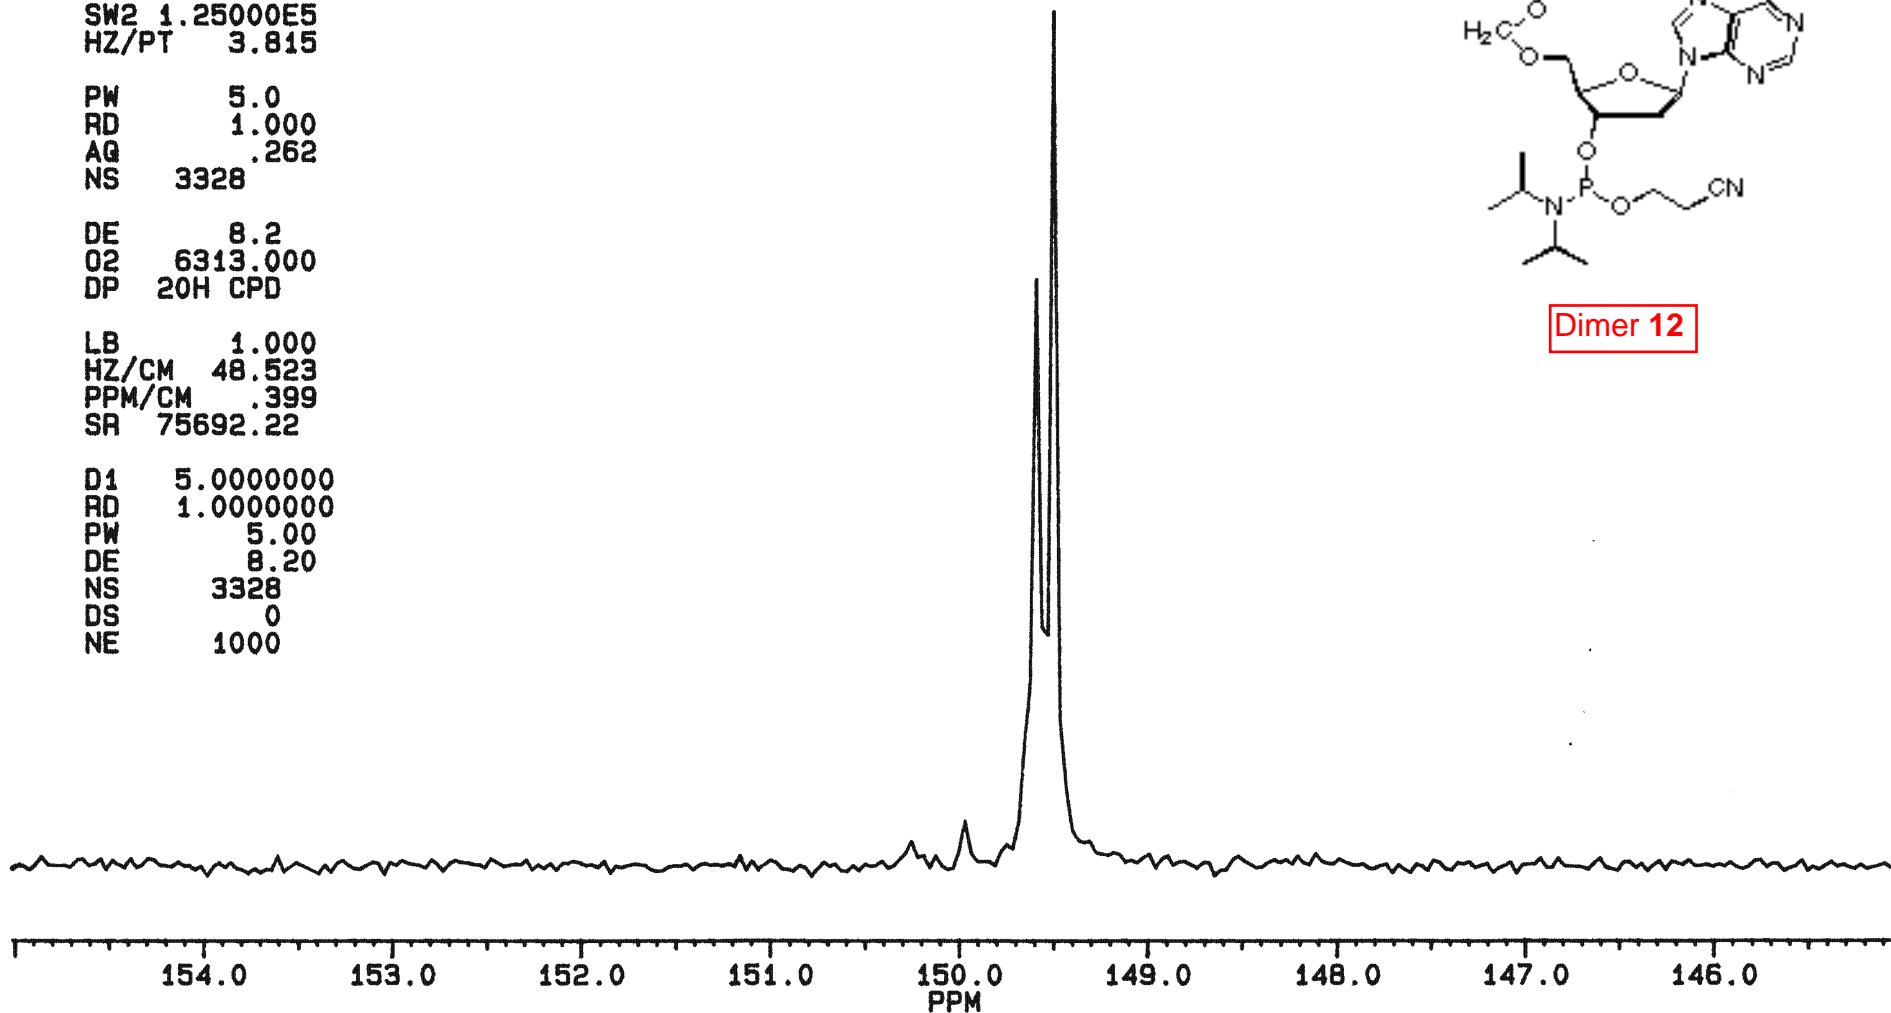

Supplement: NIHMS150019-supplement-1_si_001.pdf [file NIHMS150019-supplement-1_si_001.pdf]
